# Supplementary material
Source: PubMed Central journal article supplement (PMC3524651)
Supplement: tableS1.pdf [file tableS1.pdf]

**Supplementary table 1. Gene clusters enriched in the liver after *in vivo* Plin2-ASO treatment**

**A. Fatty acid metabolism**

| <b>Gene Name and Gene Symbol</b>                                                   |         | <b>FC</b> | <b>FDR (%)</b> | <b>Probe ID*</b> | <b>Target ID**</b> |
|------------------------------------------------------------------------------------|---------|-----------|----------------|------------------|--------------------|
| myosin VA                                                                          | Myo5a   | 3.43      | 0.28           | A_52_P635898     | NM_010864          |
| arachidonate 5-lipoxygenase activating protein                                     | Alox5ap | 3.03      | 0.24           | A_51_P235687     | NM_009663          |
| hydroxyacid oxidase 2                                                              | Hao3    | 2.56      | 0.24           | A_51_P114722     | NM_019545          |
| ELOVL family member 7, elongation of long chain fatty acids (yeast)                | Elov17  | 2.50      | 0.28           | A_52_P354682     | NM_029001          |
| acyl-CoA synthetase long-chain family member 4 similar to Quaking protein; quaking | Acs14   | 2.26      | 0.80           | A_52_P78203      | NM_207625          |
| Qk                                                                                 | Qk      | 2.17      | 0.40           | A_51_P434670     | NM_021881          |
| stearoyl-Coenzyme A desaturase 2                                                   | Scd2    | 2.16      | 0.92           | A_51_P129464     | NM_009128          |
| fatty acid desaturase 3                                                            | Fads3   | 1.66      | 0.55           | A_51_P464029     | NM_021890          |
| degenerative spermatocyte homolog 2 (Drosophila), lipid desaturase                 | Degs2   | 1.60      | 0.28           | A_51_P122649     | NM_027299          |
| ELOVL family member 5, elongation of long chain fatty acids (yeast)                | Elov15  | -1.60     | 0.92           | A_52_P676944     | NM_134255          |
| acyl-CoA synthetase long-chain family member 1                                     | Acs11   | -1.69     | 0.92           | A_51_P496432     | NM_007981          |
| acyl-CoA thioesterase 11                                                           | Acot11  | -1.70     | 0.36           | A_51_P226453     | NM_025590          |
| lipase, hormone sensitive                                                          | Lipe    | -1.80     | 0.36           | A_51_P435363     | NM_010719          |
| lipase, hepatic                                                                    | Lipc    | -2.07     | 0.35           | A_51_P263993     | NM_008280          |
| acyl-CoA synthetase medium-chain family member 1                                   | Acsm1   | -2.18     | 0.00           | A_51_P376138     | NM_054094          |
| NADH dehydrogenase (ubiquinone) 1, alpha/beta subcomplex, 1; predicted gene 4459   | Ndufab1 | -2.38     | 0.36           | A_52_P303235     | AK008788           |
| growth hormone receptor                                                            | Ghr     | -2.45     | 0.35           | A_52_P680941     | NM_010284          |
| cytochrome P450, family 4, subfamily a, polypeptide 12a                            | Cyp4a12 | -2.58     | 0.44           | A_51_P433360     | NM_177406          |

**B. Steroid metabolism**

| <b>Gene Name and Gene Symbol</b>                       |         | <b>FC</b> | <b>FDR (%)</b> | <b>Probe ID</b> | <b>Target ID</b> |
|--------------------------------------------------------|---------|-----------|----------------|-----------------|------------------|
| oxysterol binding protein-like 3                       | Osbp13  | 4.21      | 0.00           | A_51_P196844    | NM_027881        |
| sulfotransferase family 1E, member 1                   | Sult1e1 | 3.38      | 0.92           | A_51_P493649    | NM_023135        |
| cytochrome P450, family 39, subfamily a, polypeptide 1 | Cyp39a1 | 2.36      | 0.92           | A_52_P557265    | NM_018887        |
| oxysterol binding protein-like 3                       | Osbp13  | 2.04      | 0.28           | A_52_P360308    | AK040984         |

|                                                                                                                                        |         |        |      |              |              |
|----------------------------------------------------------------------------------------------------------------------------------------|---------|--------|------|--------------|--------------|
| oxysterol binding protein-like 7<br>tyrosine 3-<br>monooxygenase/tryptophan 5-<br>monooxygenase activation<br>protein, eta polypeptide | Osbp17  | 1.74   | 0.28 | A_52_P275354 | NM_001081434 |
| oxysterol binding protein-like 9<br>oxysterol binding protein-like<br>1A                                                               | Ywhah   | 1.69   | 0.40 | A_51_P306527 | NM_011738    |
| hydroxysteroid 11-beta<br>dehydrogenase 1                                                                                              | Osbp19  | -1.62  | 0.67 | A_51_P272844 | NM_173350    |
| 3-hydroxy-3-methylglutaryl-<br>Coenzyme A reductase                                                                                    | Osbp11a | -1.63  | 0.36 | A_52_P19606  | NM_207530    |
| lipase, hormone sensitive                                                                                                              | Hsd11b1 | -1.76  | 0.36 | A_51_P127297 | NM_008288    |
| hydroxysteroid (17-beta)<br>dehydrogenase 2                                                                                            | Hmgcr   | -1.77  | 0.36 | A_52_P232287 | NM_008255    |
| lipase, hepatic                                                                                                                        | Lipe    | -1.80  | 0.36 | A_51_P435363 | NM_010719    |
| hydroxy-delta-5-steroid<br>dehydrogenase, 3 beta- and<br>steroid delta-isomerase 2                                                     | Hsd17b2 | -2.05  | 0.40 | A_51_P441914 | NM_008290    |
| steroid 5 alpha-reductase 1<br>NAD(P) dependent steroid<br>dehydrogenase-like                                                          | Lipc    | -2.07  | 0.35 | A_51_P263993 | NM_008280    |
| sulfotransferase family 1B,<br>member 1                                                                                                | Hsd3b2  | -2.20  | 0.35 | A_52_P339759 | NM_153193    |
| predicted gene 4450; hydroxy-<br>delta-5-steroid dehydrogenase, 3<br>beta- and steroid delta-<br>isomerase 4; predicted gene<br>10681  | Srd5a1  | -2.89  | 0.80 | A_51_P420415 | NM_175283    |
| hydroxy-delta-5-steroid<br>dehydrogenase, 3 beta- and<br>steroid delta-isomerase 5                                                     | Nsdhl   | -2.96  | 0.36 | A_51_P326942 | NM_010941    |
|                                                                                                                                        | Sult1b1 | -5.29  | 0.36 | A_51_P206551 | NM_019878    |
|                                                                                                                                        | Hsd3b4  | -5.82  | 0.67 | A_51_P352005 | NM_008294    |
|                                                                                                                                        | Hsd3b5  | -33.59 | 0.36 | A_51_P496162 | NM_008295    |

### C. Mitosis/cell cycle

| Gene Name and<br>Gene Symbol                                                                            |        | FC   | FDR<br>(%) | Probe ID*    | Target ID** |
|---------------------------------------------------------------------------------------------------------|--------|------|------------|--------------|-------------|
| cell division cycle 20<br>homolog (S. cerevisiae)                                                       | Cdc20  | 6.19 | 0.00       | A_51_P361022 | NM_023223   |
| cyclin A2                                                                                               | Ccna2  | 3.86 | 0.00       | A_51_P481920 | NM_009828   |
| cell division cycle 2<br>homolog A (S. pombe)                                                           | Cdc2a  | 3.63 | 0.28       | A_51_P450033 | NM_007659   |
| predicted gene 8416;<br>predicted gene 5593; cyclin<br>B1; similar to cyclin B1;<br>predicted gene 4870 | Ccnb1  | 3.09 | 0.24       | A_52_P202770 | NM_172301   |
| SPC25, NDC80<br>kinetochore complex<br>component, homolog (S.<br>cerevisiae)                            | Spbc25 | 3.07 | 0.00       | A_51_P514700 | NM_025565   |
| shugoshin-like 1 (S. pombe)                                                                             | Sgol1  | 2.96 | 0.00       | A_51_P487999 | NM_028232   |

|                                                                                                                            |                   |      |      |              |           |
|----------------------------------------------------------------------------------------------------------------------------|-------------------|------|------|--------------|-----------|
| similar to Nuf2 protein;<br>NUF2, NDC80 kinetochore<br>complex component,<br>homolog ( <i>S. cerevisiae</i> )              | Cdca1             | 2.94 | 0.00 | A_51_P513682 | NM_023284 |
| centromere protein E                                                                                                       | Cenpe             | 2.79 | 0.00 | A_51_P164014 | BC059032  |
| similar to spindle assembly<br>checkpoint protein; MAD2<br>mitotic arrest deficient-like<br>1 (yeast)                      | Mad211            | 2.79 | 0.55 | A_51_P230873 | NM_019499 |
| ubiquitin-conjugating<br>enzyme E2C; predicted<br>gene 8956                                                                | Ube2c             | 2.70 | 0.00 | A_51_P451151 | NM_026785 |
| budding uninhibited by<br>benzimidazoles 1 homolog<br>( <i>S. cerevisiae</i> )                                             | Bub1              | 2.59 | 0.00 | A_51_P123405 | NM_009772 |
| inner centromere protein                                                                                                   | Incenp            | 2.47 | 0.28 | A_51_P264064 | NM_016692 |
| cell division cycle<br>associated 8                                                                                        | Cdca8             | 2.41 | 0.00 | A_51_P155142 | NM_026560 |
| cell division cycle<br>associated 2                                                                                        | Cdca2             | 2.37 | 0.28 | A_51_P444696 | NM_175384 |
| similar to Kifc1 protein;<br>kinesin family member C1;<br>predicted gene 4137                                              | Kifc1             | 2.27 | 0.28 | A_51_P137433 | NM_053173 |
| structural maintenance of<br>chromosomes 4                                                                                 | Smc4              | 2.26 | 0.92 | A_51_P111210 | NM_133786 |
| similar to Kinesin-like<br>protein KIF2C (Mitotic<br>centromere-associated<br>kinesin) (MCAK); kinesin<br>family member 2C | Kif2c             | 2.26 | 0.00 | A_51_P135092 | NM_134471 |
| sperm associated antigen 5                                                                                                 | Spag5             | 2.19 | 0.28 | A_51_P513530 | NM_017407 |
| similar to spindle assembly<br>checkpoint protein; MAD2<br>mitotic arrest deficient-like<br>1 (yeast)                      | Mad211            | 2.12 | 0.40 | A_51_P230878 | U83902    |
| nucleolar and spindle<br>associated protein 1                                                                              | Nusap1            | 2.08 | 0.28 | A_51_P240453 | NM_133851 |
| anillin, actin binding<br>protein                                                                                          | Anln              | 2.08 | 0.28 | A_52_P512955 | NM_028390 |
| non-SMC condensin I<br>complex, subunit D2                                                                                 | 2810406<br>C15Rik | 2.05 | 0.18 | A_52_P139399 | NM_146171 |
| kinesin family member 11                                                                                                   | Kif11             | 1.99 | 0.28 | A_51_P481398 | NM_010615 |
| structural maintenance of<br>chromosomes 2                                                                                 | Smc2              | 1.99 | 0.28 | A_52_P636199 | NM_008017 |
| cyclin B2                                                                                                                  | Ccnb2             | 1.98 | 0.28 | A_51_P457528 | NM_007630 |
| baculoviral IAP repeat-<br>containing 5                                                                                    | Birc5             | 1.94 | 0.40 | A_51_P230103 | NM_009689 |
| kinesin family member 20B                                                                                                  | Kif20b            | 1.82 | 0.30 | A_52_P149336 | NM_183046 |
| centromere protein E                                                                                                       | Cenpe             | 1.81 | 0.00 | A_51_P174192 | NM_173762 |

|                                                                                                                                                                                                                                                               |                             |              |              |                              |                        |
|---------------------------------------------------------------------------------------------------------------------------------------------------------------------------------------------------------------------------------------------------------------|-----------------------------|--------------|--------------|------------------------------|------------------------|
| anaphase promoting complex subunit 4<br>RIKEN cDNA<br>F630043A04 gene                                                                                                                                                                                         | Anapc4<br>F630043<br>A04Rik | 1.80<br>1.68 | 0.28<br>0.44 | A_51_P434198<br>A_51_P519791 | NM_024213<br>NM_198605 |
| budding uninhibited by benzimidazoles 1 homolog, beta ( <i>S. cerevisiae</i> )                                                                                                                                                                                | Bub1b                       | 1.65         | 0.92         | A_51_P490509                 | NM_009773              |
| cancer susceptibility candidate 5                                                                                                                                                                                                                             | Casc5                       | 1.64         | 0.28         | A_51_P489285                 | BC080815               |
| excision repair cross-complementing rodent repair deficiency complementation group 6-like                                                                                                                                                                     | Ercc6l                      | 1.61         | 0.40         | A_51_P123134                 | NM_146235              |
| rho/rac guanine nucleotide exchange factor (GEF) 2<br>predicted gene 8545;<br>microtubule-associated protein, RP/EB family, member 1; similar to Microtubule-associated protein RP/EB family member 1 (APC-binding protein EB1) (End-binding protein 1) (EB1) | Arhgef2<br>Mapre1           | 1.60<br>1.57 | 0.92<br>0.30 | A_52_P157677<br>A_51_P185509 | NM_008487<br>AK087318  |
| cell division cycle 25 homolog B ( <i>S. pombe</i> )                                                                                                                                                                                                          | Cdc25b                      | 1.56         | 0.28         | A_51_P474431                 | NM_023117              |
| cancer susceptibility candidate 5                                                                                                                                                                                                                             | Casc5                       | 1.55         | 0.24         | A_51_P442964                 | AK017750               |
| DSN1, MIND kinetochore complex component, homolog ( <i>S. cerevisiae</i> )                                                                                                                                                                                    | 1700022<br>L09Rik           | 1.55         | 0.28         | A_51_P337655                 | NM_025853              |
| ubiquitin specific peptidase 9, X chromosome                                                                                                                                                                                                                  | Usp9x                       | -1.64        | 0.40         | A_51_P261528                 | NM_009481              |
| thioredoxin-like 4A                                                                                                                                                                                                                                           | Txn14                       | -2.47        | 0.36         | A_51_P360836                 | NM_178604              |
| NIMA (never in mitosis gene a)-related expressed kinase 1                                                                                                                                                                                                     | Nek1                        | -2.51        | 0.35         | A_52_P673519                 | AK173292               |

#### D. Kinetochrome

| Gene Name and Gene Symbol                                                       |        | FC   | FDR (%) | Probe ID*    | Target ID** |
|---------------------------------------------------------------------------------|--------|------|---------|--------------|-------------|
| SPC25, NDC80<br>kinetochore complex component, homolog ( <i>S. cerevisiae</i> ) | Spbc25 | 3.07 | 0.00    | A_51_P514700 | NM_025565   |
| centromere protein A                                                            | Cenpa  | 2.97 | 0.24    | A_51_P273979 | NM_007681   |
| shugoshin-like 1 ( <i>S. pombe</i> )                                            | Sgol1  | 2.96 | 0.00    | A_51_P487999 | NM_028232   |

|                                                                                                                            |                       |       |      |              |           |
|----------------------------------------------------------------------------------------------------------------------------|-----------------------|-------|------|--------------|-----------|
| similar to Nuf2 protein;<br>NUF2, NDC80 kinetochore<br>complex component,<br>homolog ( <i>S. cerevisiae</i> )              | Cdca1                 | 2.94  | 0.00 | A_51_P513682 | NM_023284 |
| centromere protein E                                                                                                       | Cenpe                 | 2.79  | 0.00 | A_51_P164014 | BC059032  |
| similar to spindle assembly<br>checkpoint protein; MAD2<br>mitotic arrest deficient-like<br>1 (yeast)                      | Mad211                | 2.79  | 0.55 | A_51_P230873 | NM_019499 |
| budding uninhibited by<br>benzimidazoles 1 homolog<br>( <i>S. cerevisiae</i> )                                             | Bub1                  | 2.59  | 0.00 | A_51_P123405 | NM_009772 |
| inner centromere protein                                                                                                   | Incenp                | 2.47  | 0.28 | A_51_P264064 | NM_016692 |
| similar to Kinesin-like<br>protein KIF2C (Mitotic<br>centromere-associated<br>kinesin) (MCAK); kinesin<br>family member 2C | Kif2c                 | 2.26  | 0.00 | A_51_P135092 | NM_134471 |
| sperm associated antigen 5                                                                                                 | Spag5                 | 2.19  | 0.28 | A_51_P513530 | NM_017407 |
| similar to spindle assembly<br>checkpoint protein; MAD2<br>mitotic arrest deficient-like<br>1 (yeast)                      | Mad211                | 2.12  | 0.40 | A_51_P230878 | U83902    |
| centromere protein E                                                                                                       | Cenpe                 | 1.81  | 0.00 | A_51_P174192 | NM_173762 |
| RIKEN cDNA<br>F630043A04 gene                                                                                              | F63004<br>3A04Ri<br>k | 1.68  | 0.44 | A_51_P519791 | NM_198605 |
| centromere protein H                                                                                                       | Cenph                 | 1.66  | 0.28 | A_51_P492830 | NM_021886 |
| budding uninhibited by<br>benzimidazoles 1 homolog,<br>beta ( <i>S. cerevisiae</i> )                                       | Bub1b                 | 1.65  | 0.92 | A_51_P490509 | NM_009773 |
| cancer susceptibility<br>candidate 5                                                                                       | Casc5                 | 1.64  | 0.28 | A_51_P489285 | BC080815  |
| excision repair cross-<br>complementing rodent<br>repair deficiency<br>complementation group 6 -<br>like                   | Ercc6l                | 1.61  | 0.40 | A_51_P123134 | NM_146235 |
| cancer susceptibility<br>candidate 5                                                                                       | Casc5                 | 1.55  | 0.24 | A_51_P442964 | AK017750  |
| DSN1, MIND kinetochore<br>complex component,<br>homolog ( <i>S. cerevisiae</i> )                                           | 1700022<br>L09Rik     | 1.55  | 0.28 | A_51_P337655 | NM_025853 |
| nucleoporin 133                                                                                                            | Nup133                | -2.42 | 0.24 | A_51_P288447 | NM_172288 |

### E. Hepatocyte proliferation

| Gene Name and<br>Gene Symbol |     | FC    | FDR<br>(%) | Probe ID*    | Target ID** |
|------------------------------|-----|-------|------------|--------------|-------------|
| alpha fetoprotein            | Afp | 45.79 | 0.18       | A_51_P510891 | NM_007423   |

|                                                    |       |       |      |              |          |
|----------------------------------------------------|-------|-------|------|--------------|----------|
| H19 fetal liver mRNA                               | H19   | 20.61 | 0.00 | A_52_P571350 | AK003142 |
| H19 fetal liver mRNA                               | H19   | 15.86 | 0.00 | A_51_P142196 | BC025150 |
| antigen identified by<br>monoclonal antibody Ki 67 | Mki67 | 4.71  | 0.00 |              | X82786   |

#### F. Extracellular matrix

| Gene Name and<br>Gene Symbol                                                                                                                                                                       |         | FC   | FDR<br>(%) | Probe ID*    | Target ID** |
|----------------------------------------------------------------------------------------------------------------------------------------------------------------------------------------------------|---------|------|------------|--------------|-------------|
| collagen, type I, alpha 1                                                                                                                                                                          | Col1a1  | 7.73 | 0.28       | A_52_P525107 | NM_007742   |
| matrix metalloproteinase 12                                                                                                                                                                        | Mmp12   | 7.41 | 0.00       | A_51_P313674 | NM_008605   |
| lectin, galactose binding,<br>soluble 3                                                                                                                                                            | Lgals3  | 7.09 | 0.28       | A_51_P101929 | NM_010705   |
| coiled-coil domain<br>containing 80                                                                                                                                                                | Ccdc80  | 6.33 | 0.00       | A_51_P248786 | NM_026439   |
| collagen, type III, alpha 1                                                                                                                                                                        | Col3a1  | 6.22 | 0.24       | A_51_P515605 | NM_009930   |
| periostin, osteoblast<br>specific factor                                                                                                                                                           | Postn   | 4.38 | 0.18       | A_51_P489192 | NM_015784   |
| lumican                                                                                                                                                                                            | Lum     | 4.06 | 0.40       | A_51_P167527 | NM_008524   |
| collagen, type I, alpha 2                                                                                                                                                                          | Col1a2  | 3.32 | 0.92       | A_51_P182303 | NM_007743   |
| secreted acidic cysteine rich<br>glycoprotein; similar to<br>Secreted acidic cysteine<br>rich glycoprotein<br>similar to Nidogen<br>precursor (Entactin);<br>nidogen 1; similar to Nid1<br>protein | Sparc   | 3.29 | 0.18       | A_51_P431087 | NM_009242   |
|                                                                                                                                                                                                    | Nid1    | 3.27 | 0.28       | A_51_P339943 | NM_010917   |
| spondin 2, extracellular<br>matrix protein                                                                                                                                                         | Spon2   | 3.16 | 0.28       | A_52_P381484 | NM_133903   |
| collagen, type IV, alpha 1                                                                                                                                                                         | Col4a1  | 3.10 | 0.28       | A_51_P124254 | NM_009931   |
| matrix metalloproteinase 8                                                                                                                                                                         | Mmp8    | 2.89 | 0.28       | A_51_P231320 | NM_008611   |
| matrix metalloproteinase 7                                                                                                                                                                         | Mmp7    | 2.71 | 0.44       | A_51_P426096 | NM_010810   |
| collagen, type II, alpha 1                                                                                                                                                                         | Col2a1  | 2.70 | 0.67       | A_51_P317141 | NM_031163   |
| surfactant associated<br>protein D                                                                                                                                                                 | Sftpd   | 2.63 | 0.00       | A_51_P35982  | NM_009160   |
| collagen, type VI, alpha 1                                                                                                                                                                         | Col6a1  | 2.50 | 0.18       | A_51_P474496 | NM_009933   |
| collagen, type XIV, alpha 1                                                                                                                                                                        | Col14a1 | 2.50 | 0.30       | A_51_P326529 | NM_181277   |
| microfibrillar-associated<br>protein 2                                                                                                                                                             | Mfap2   | 2.36 | 0.28       | A_51_P227502 | NM_008546   |
| a disintegrin and<br>metalloproteinase domain 15<br>(metargidin)                                                                                                                                   | Adam15  | 2.27 | 0.40       | A_51_P291815 | NM_009614   |
| cartilage associated protein                                                                                                                                                                       | Crtap   | 2.24 | 0.28       | A_51_P201721 | NM_019922   |
| ectonucleoside triphosphate<br>diphosphohydrolase 2                                                                                                                                                | Entpd2  | 2.12 | 0.28       | A_51_P112932 | NM_009849   |
| transforming growth factor,<br>beta 3                                                                                                                                                              | Tgfb3   | 2.03 | 0.44       | A_51_P124748 | NM_009368   |
| collagen, type V, alpha 2                                                                                                                                                                          | Col5a2  | 2.00 | 0.92       | A_51_P247883 | NM_007737   |

|                                                                                |        |       |      |              |           |
|--------------------------------------------------------------------------------|--------|-------|------|--------------|-----------|
| epidermal growth factor-containing fibulin-like extracellular matrix protein 2 | Efemp2 |       |      | A_51_P160544 |           |
| transglutaminase 2, C polypeptide                                              | Tgm2   | 1.98  | 0.28 | A_52_P220879 | NM_021474 |
| multimerin 2                                                                   | Mmrn2  | 1.97  | 0.30 |              | NM_009373 |
| transforming growth factor, beta 1                                             | Tgfb1  | 1.93  | 0.30 | A_51_P414396 | NM_153127 |
| Von Willebrand factor homolog                                                  | Vwf    | 1.92  | 0.28 | A_51_P390715 | NM_011577 |
| laminin, gamma 1                                                               | Lamc1  | 1.85  | 0.44 | A_51_P103397 | DQ355288  |
| collagen, type V, alpha 1                                                      | Col5a1 | 1.84  | 0.40 | A_51_P199354 | NM_010683 |
| laminin, gamma 2                                                               | Lamc2  | 1.72  | 0.40 | A_51_P414637 | NM_015734 |
| collagen, type IV, alpha 2                                                     | Col4a2 | 1.67  | 0.28 | A_51_P174943 | NM_008485 |
| matrix metalloproteinase 14 (membrane-inserted)                                | Mmp14  | 1.64  | 0.18 | A_52_P496142 | NM_009932 |
| interphotoreceptor matrix proteoglycan 2                                       | Impg2  | 1.57  | 0.28 | A_51_P216303 | NM_008608 |
| laminin, alpha 3                                                               | Lama3  | -1.74 | 0.36 | A_52_P26106  | NM_174876 |
| angiogenin, ribonuclease, RNase A family, 5                                    | Ang1   | -1.76 | 0.36 | A_51_P167489 | XM_140451 |
| matrix metalloproteinase 15                                                    | Mmp15  | -1.87 | 0.36 | A_51_P391159 | NM_007447 |
| fibroblast growth factor 1                                                     | Fgf1   | -1.88 | 0.36 | A_51_P220062 | NM_008609 |
| collagen, type V, alpha 3                                                      | Col5a3 | -2.54 | 0.23 | A_51_P148828 | NM_010197 |
|                                                                                |        | -2.99 | 0.23 | A_52_P503796 | NM_016919 |

### G. Others

| Gene Name and Gene Symbol                                                                                                 | Gene Symbol | FC    | FDR (%) | Probe ID*    | Target ID** |
|---------------------------------------------------------------------------------------------------------------------------|-------------|-------|---------|--------------|-------------|
| flavin containing monooxygenase 3                                                                                         | Fmo3        | 26.80 | 0.24    | A_51_P269404 | NM_008030   |
| RIKEN cDNA D630002G06 gene                                                                                                | D63002G06   |       |         |              |             |
| small proline-rich protein 1A                                                                                             | Rik         | 16.44 | 0.00    | A_51_P144531 | NM_172776   |
| calmodulin-like 4                                                                                                         | Sprr1a      | 10.27 | 0.00    | A_51_P139678 | NM_009264   |
| keratin 23                                                                                                                | Calml4      | 7.91  | 0.67    | A_52_P367760 | NM_138304   |
| lipoprotein lipase; similar to Lipoprotein lipase precursor (LPL)                                                         | Krt23       | 7.37  | 0.00    | A_51_P287198 | NM_033373   |
| glycoprotein (transmembrane) nmb                                                                                          | Lpl         | 6.72  | 0.13    | A_52_P257812 | NM_008509   |
| lymphocyte antigen 6 complex, locus D                                                                                     | Gpnm        | 6.50  | 0.13    | A_51_P438967 | NM_053110   |
| secreted phosphoprotein 1                                                                                                 | b           | 6.33  | 0.28    | A_51_P343517 | NM_010742   |
| histocompatibility 2, Q region locus 1; histocompatibility 2, Q region locus 9; similar to H-2 class I histocompatibility | Spp1        | 6.22  | 0.24    | A_51_P358765 | NM_009263   |
|                                                                                                                           | H2-Q1       | 6.04  | 0.00    | A_52_P231729 | U96752      |

|                                                                                                                                                                                                                                                                                                                                                                                                |         |      |      |              |           |
|------------------------------------------------------------------------------------------------------------------------------------------------------------------------------------------------------------------------------------------------------------------------------------------------------------------------------------------------------------------------------------------------|---------|------|------|--------------|-----------|
| antigen, L-D alpha chain precursor; histocompatibility 2, Q region locus 8; histocompatibility 2, Q region locus 2; similar to MHC class Ib antigen; histocompatibility 2, Q region locus 7; histocompatibility 2, Q region locus 6; hypothetical protein LOC100044307; similar to H-2 class I histocompatibility antigen, Q7 alpha chain precursor (QA-2 antigen); RIKEN cDNA 0610037M15 gene |         |      |      |              |           |
| a disintegrin and metalloproteinase domain 8 predicted gene 4322; brain expressed gene 4                                                                                                                                                                                                                                                                                                       | Adam8   | 5.83 | 0.30 | A_51_P319917 | NM_007403 |
| capping protein (actin filament), gelsolin-like                                                                                                                                                                                                                                                                                                                                                | Bex4    | 5.70 | 0.00 | A_51_P494342 | NM_212457 |
| CD63 antigen                                                                                                                                                                                                                                                                                                                                                                                   | Capg    | 5.70 | 0.28 | A_51_P273921 | NM_007599 |
| similar to Annexin A2 (Annexin II) (Lipocortin II) (Calpactin I heavy chain) (Chromobindin-8) (p36) (Protein I) (Placental anticoagulant protein IV) (PAP-IV); annexin A2 regulator of G-protein signaling 1                                                                                                                                                                                   | Cd63    | 5.66 | 0.24 | A_51_P511810 | NM_007653 |
| neurotrophic tyrosine kinase, receptor, type 2                                                                                                                                                                                                                                                                                                                                                 | Anxa2   | 5.58 | 0.00 | A_52_P62037  | NM_007585 |
| tubulointerstitial nephritis antigen                                                                                                                                                                                                                                                                                                                                                           | Rgs1    | 5.45 | 0.92 | A_51_P260683 | NM_015811 |
| triggering receptor expressed on myeloid cells 2                                                                                                                                                                                                                                                                                                                                               | Ntrk2   | 5.43 | 0.24 | A_51_P516006 | AK018789  |
| predicted gene 7665; S100 calcium binding protein A11 (calgizzarin); predicted gene 5068                                                                                                                                                                                                                                                                                                       | Tinag   | 5.27 | 0.13 | A_51_P283004 | NM_012033 |
| cytochrome P450, family 3, subfamily a, polypeptide 44                                                                                                                                                                                                                                                                                                                                         | Trem2   | 5.20 | 0.00 | A_51_P269549 | NM_031254 |
| neural proliferation, differentiation and control gene 1                                                                                                                                                                                                                                                                                                                                       | S100a11 | 4.98 | 0.24 | A_51_P155643 | NM_016740 |
| DNA segment, Chr 17, human D6S56E 5                                                                                                                                                                                                                                                                                                                                                            | Cyp3a44 | 4.93 | 0.28 | A_52_P366803 | NM_177380 |
| maternally expressed 3                                                                                                                                                                                                                                                                                                                                                                         | Npdc1   | 4.93 | 0.00 | A_51_P154596 | NM_008721 |
|                                                                                                                                                                                                                                                                                                                                                                                                | D17H6   |      |      |              |           |
|                                                                                                                                                                                                                                                                                                                                                                                                | S56E-5  | 4.87 | 0.55 | A_52_P416756 | NM_033075 |
|                                                                                                                                                                                                                                                                                                                                                                                                | Meg3    | 4.86 | 0.13 | A_51_P455997 | AK155982  |



|                                                                                                  |                   |      |      |              |              |
|--------------------------------------------------------------------------------------------------|-------------------|------|------|--------------|--------------|
| tubulin, beta 6                                                                                  | Tubb6             | 4.84 | 0.00 | A_51_P421140 | NM_026473    |
| plakophilin 1                                                                                    | Pkp1              | 4.78 | 0.00 | A_51_P151732 | NM_019645    |
| CD36 antigen                                                                                     | Cd36              | 4.76 | 0.28 | A_51_P375138 | L23108       |
| CD14 antigen                                                                                     | Cd14              | 4.65 | 0.40 | A_51_P172853 | NM_009841    |
| cyclin-dependent kinase inhibitor 3                                                              | Cdkn3             | 4.59 | 0.00 | A_52_P30989  | BC049694     |
| neurotrophic tyrosine kinase, receptor, type 2                                                   | Ntrk2             | 4.59 | 0.00 | A_51_P516012 | NM_008745    |
| CD36 antigen                                                                                     | Cd36              | 4.54 | 0.28 | A_51_P375146 | NM_007643    |
| ependymin related protein 1 (zebrafish)                                                          | Epdr2             | 4.43 | 0.00 | A_52_P577388 | NM_134065    |
| tubulin, alpha 8                                                                                 | Tuba8             | 4.38 | 0.00 | A_52_P303161 | NM_017379    |
| protein regulator of cytokinesis 1                                                               | Prc1              | 4.34 | 0.00 | A_51_P366931 | NM_145150    |
| discoidin domain receptor family, member 1                                                       | Ddr1              | 4.31 | 0.00 | A_51_P161582 | NM_007584    |
| CD93 antigen                                                                                     | Cd93              | 4.28 | 0.18 | A_51_P238722 | NM_010740    |
| tubulin, beta 2A                                                                                 | Tubb2             | 4.28 | 0.00 | A_51_P490023 | NM_009450    |
| RIKEN cDNA 2310043N10 gene                                                                       | 2310043N10<br>Rik | 4.18 | 0.40 | A_51_P234692 | AK028745     |
| synaptogyrin 1                                                                                   | Syng1             | 4.14 | 0.24 | A_51_P270741 | NM_009303    |
| fibulin 5                                                                                        | Fbln5             | 4.10 | 0.28 | A_51_P186703 | NM_011812    |
| PDZ binding kinase                                                                               | Pbk               | 4.10 | 0.00 | A_51_P230098 | NM_023209    |
| lysozyme 2                                                                                       | Lyzs              | 4.08 | 0.30 | A_52_P238027 | NM_017372    |
| stathmin 1; predicted gene 11223; predicted gene 6393                                            | Stmn1             | 4.04 | 0.00 | A_51_P495641 | NM_019641    |
| minichromosome maintenance deficient 6 (MIS5 homolog, <i>S. pombe</i> ) ( <i>S. cerevisiae</i> ) | Mcm6              | 4.04 | 0.00 | A_51_P360492 | NM_008567    |
| brain expressed gene 1                                                                           | Bex1              | 4.01 | 0.00 | A_51_P279154 | NM_009052    |
| 5' nucleotidase, ecto                                                                            | Nt5e              | 4.01 | 0.00 | A_52_P574668 | NM_011851    |
| vimentin                                                                                         | Vim               | 3.87 | 0.30 | A_51_P392687 | NM_011701    |
| LysM, putative peptidoglycan-binding, domain containing 2                                        | Lysmd2            | 3.82 | 0.18 | A_51_P233160 | NM_027309    |
| RIKEN cDNA 1190002F15 gene                                                                       | 1190002F15<br>Rik | 3.79 | 0.80 | A_52_P354373 | AK138072     |
| RIKEN cDNA 5430435G22 gene                                                                       | 5430435G22<br>Rik | 3.74 | 0.28 | A_52_P244682 | NM_145509    |
| RIKEN cDNA 5730416F02 gene                                                                       | 5730416F02<br>Rik | 3.73 | 0.28 | A_52_P110070 | AK017567     |
| UDP-N-acetylglucosamine pyrophosphorylase 1-like 1                                               | Uap111            | 3.66 | 0.28 | A_51_P509669 | NM_001033293 |
| CD34 antigen                                                                                     | Cd34              | 3.65 | 0.44 | A_51_P204740 | NM_133654    |

|                                                                                                                                           |               |      |      |              |                  |
|-------------------------------------------------------------------------------------------------------------------------------------------|---------------|------|------|--------------|------------------|
| solute carrier family 5<br>(sodium iodide symporter),<br>member 5                                                                         | Slc5a5        | 3.64 | 0.00 | A_51_P115738 | NM_053248        |
| histone cluster 1, H1c                                                                                                                    | Hist1h<br>1c  | 3.64 | 0.00 | A_51_P516133 | NM_015786        |
| similar to LPS-induced CXC<br>chemokine; chemokine (C-X-<br>C motif) ligand 5                                                             | Cxcl5         | 3.56 | 0.28 | A_52_P295432 | NM_009141        |
| mesoderm specific transcript                                                                                                              | Mest          | 3.51 | 0.55 | A_51_P124535 | NM_008590        |
| colony stimulating factor 2<br>receptor, beta 2, low-affinity<br>(granulocyte-macrophage)                                                 | Csf2rb<br>2   | 3.46 | 0.28 | A_51_P146753 | NM_007781        |
| cyclin-dependent kinase<br>inhibitor 2C (p18, inhibits<br>CDK4)                                                                           | Cdkn2<br>c    | 3.43 | 0.28 | A_51_P513720 | U19596           |
| zinc finger, DHHC domain<br>containing 2                                                                                                  | Zdhhc<br>2    | 3.42 | 0.30 | A_52_P281941 | NM_178395        |
| SH3 domain binding<br>glutamic acid-rich protein-<br>like 3                                                                               | Sh3bgr<br>l3  | 3.40 | 0.28 | A_51_P344752 | NM_080559        |
| armadillo repeat containing,<br>X-linked 4                                                                                                | AI448<br>196  | 3.37 | 0.28 | A_51_P346634 | BC025879         |
| CD68 antigen                                                                                                                              | Cd68<br>18100 | 3.36 | 0.28 | A_51_P120470 | NM_009853        |
| interferon, alpha-inducible<br>protein 27 like 2B                                                                                         | 23F06<br>Rik  | 3.35 | 0.28 | A_51_P391432 | NM_145449        |
| cytoskeleton associated<br>protein 2-like                                                                                                 | Ckap2l        | 3.35 | 0.00 | A_52_P399584 | NM_181589        |
| BMP-binding endothelial<br>regulator                                                                                                      | Bmper         | 3.35 | 0.28 | A_51_P488196 | NM_028472        |
| WAP four-disulfide core<br>domain 3                                                                                                       | Wfdc3         | 3.31 | 0.00 | A_52_P416086 | NM_027961        |
| pleckstrin homology-like<br>domain, family A, member 3                                                                                    | Phlda3        | 3.30 | 0.28 | A_51_P329928 | NM_013750        |
| zinc finger protein 259                                                                                                                   | Zfp259        | 3.30 | 0.44 | A_52_P43135  | AK168061         |
| NIMA (never in mitosis gene<br>a)-related expressed kinase 2                                                                              | Nek2          | 3.27 | 0.00 | A_51_P501018 | NM_010892        |
| lysozyme 1                                                                                                                                | Lzp-s         | 3.26 | 0.30 | A_52_P582059 | NM_013590        |
| abhydrolase domain<br>containing 2                                                                                                        | Abhd2         | 3.25 | 0.30 | A_51_P440584 | NM_018811        |
| ceroid-lipofuscinosis,<br>neuronal 6                                                                                                      | Cln6          | 3.21 | 0.28 | A_52_P163939 | NM_00103317<br>5 |
| predicted gene 6560;<br>predicted gene 2124;<br>predicted gene 6992;<br>pyruvate kinase, muscle;<br>similar to M2-type pyruvate<br>kinase | Pkm2          | 3.20 | 0.40 | A_52_P150212 | NM_011099        |
| pleiomorphic adenoma gene-<br>like 1                                                                                                      | Plagl1        | 3.19 | 0.00 | A_52_P532456 | BC065150         |
| solute carrier family 25                                                                                                                  | Slc25a        | 3.18 | 0.28 | A_52_P105040 | NM_007450        |

|                                                                                                                                                                                                                                                        |                |      |      |              |           |
|--------------------------------------------------------------------------------------------------------------------------------------------------------------------------------------------------------------------------------------------------------|----------------|------|------|--------------|-----------|
| (mitochondrial carrier, adenine nucleotide translocator), member 4                                                                                                                                                                                     | 4              |      |      |              |           |
|                                                                                                                                                                                                                                                        | Golph          |      |      |              |           |
| golgi membrane protein 1                                                                                                                                                                                                                               | 2              | 3.16 | 0.18 | A_51_P171200 | NM_027307 |
| integrin alpha 6                                                                                                                                                                                                                                       | Itga6          | 3.16 | 0.28 | A_51_P262401 | BC024571  |
| basic helix-loop-helix domain containing, class B9                                                                                                                                                                                                     | Bhlhb9         | 3.14 | 0.00 | A_51_P323081 | NM_198161 |
| histone cluster 1, H2ad; histone cluster 1, H2ae; histone cluster 1, H2ag; histone cluster 1, H2ah; histone cluster 1, H2ai; similar to histone 2a; histone cluster 1, H2an; histone cluster 1, H2ao; histone cluster 1, H2ac; histone cluster 1, H2ab | MGC7<br>3635   | 3.13 | 0.00 | A_52_P130490 | BC090402  |
| glypican 3                                                                                                                                                                                                                                             | Gpc3           | 3.13 | 0.28 | A_52_P23225  | NM_016697 |
| coactosin-like 1 (Dictyostelium)                                                                                                                                                                                                                       | Cot11          | 3.11 | 0.28 | A_52_P435356 | NM_028071 |
| RecQ protein-like 4                                                                                                                                                                                                                                    | Recql4         | 3.09 | 0.18 | A_51_P260178 | NM_058214 |
| methylenetetrahydrofolate dehydrogenase (NADP+ dependent) 1-like                                                                                                                                                                                       | Mthfd<br>11    | 3.09 | 0.00 | A_52_P167278 | NM_172308 |
| WD repeat domain 40B                                                                                                                                                                                                                                   | Wdr40<br>b     | 3.08 | 0.28 | A_51_P170795 | NM_178739 |
| cell division cycle associated 3                                                                                                                                                                                                                       | Cdca3          | 3.06 | 0.00 | A_52_P628067 | NM_013538 |
| chemokine (C-C motif) ligand 6                                                                                                                                                                                                                         | Ccl6           | 3.04 | 0.55 | A_51_P460954 | NM_009139 |
| predicted gene 6560; predicted gene 2124; predicted gene 6992; pyruvate kinase, muscle; similar to M2-type pyruvate kinase                                                                                                                             | Pkm2           | 3.00 | 0.28 | A_51_P428913 | D38379    |
| shisa homolog 2 (Xenopus laevis)                                                                                                                                                                                                                       | Tmem<br>46     | 2.99 | 0.28 | A_51_P408649 | NM_145463 |
| predicted gene 9975                                                                                                                                                                                                                                    | C7300<br>49P21 | 2.99 | 0.28 | A_52_P238159 | AK050463  |
| insulin-like growth factor 2                                                                                                                                                                                                                           | Igf2           | 2.99 | 0.30 | A_51_P516826 | NM_010514 |
| centromere protein A                                                                                                                                                                                                                                   | Cenpa          | 2.97 | 0.24 | A_51_P273979 | NM_007681 |
| growth arrest specific 6                                                                                                                                                                                                                               | Gas6           | 2.97 | 0.18 | A_51_P172054 | NM_019521 |
| ASF1 anti-silencing function 1 homolog B (S. cerevisiae)                                                                                                                                                                                               | Asf1b          | 2.97 | 0.00 | A_51_P330213 | NM_024184 |
| chemokine (C-C motif) ligand 4                                                                                                                                                                                                                         | Ccl4           | 2.97 | 0.28 | A_51_P509573 | NM_013652 |
| Rho GTPase activating protein 22                                                                                                                                                                                                                       | Arhga<br>p22   | 2.96 | 0.00 | A_51_P438165 | NM_153800 |
| Kruppel-like factor 6                                                                                                                                                                                                                                  | Klf6           | 2.93 | 0.18 | A_51_P503162 | NM_011803 |

|                                                              |          |      |      |              |              |
|--------------------------------------------------------------|----------|------|------|--------------|--------------|
| cathepsin S                                                  | Ctss     | 2.92 | 0.67 | A_51_P423981 | NM_021281    |
|                                                              | Hist1h   |      |      |              |              |
| histone cluster 1, H1d                                       | 1d       | 2.90 | 0.00 | A_52_P10683  | NM_145713    |
| EP300 interacting inhibitor of differentiation 1             | Cri1     | 2.90 | 0.40 | A_51_P205564 | NM_025613    |
| serum deprivation response                                   | Sdpr     | 2.89 | 0.55 | A_51_P277336 | NM_138741    |
| nerve growth factor receptor (TNFRSF16) associated protein 1 | Ngfrap1  | 2.86 | 0.18 | A_51_P408155 | NM_009750    |
| CD44 antigen                                                 | Cd44     | 2.83 | 0.55 | A_52_P229536 | NM_009851    |
| histone cluster 1, H4k;                                      |          |      |      |              |              |
| histone cluster 1, H4m;                                      |          |      |      |              |              |
| histone cluster 4, H4; similar to germinal histone H4 gene;  |          |      |      |              |              |
| histone cluster 1, H4h;                                      |          |      |      |              |              |
| histone cluster 1, H4j;                                      |          |      |      |              |              |
| histone cluster 1, H4i;                                      |          |      |      |              |              |
| histone cluster 1, H4d;                                      |          |      |      |              |              |
| histone cluster 1, H4c;                                      |          |      |      |              |              |
| histone cluster 1, H4f;                                      |          |      |      |              |              |
| histone cluster 1, H4b;                                      |          |      |      |              |              |
| histone cluster 1, H4a;                                      |          |      |      |              |              |
| histone cluster 2, H4; similar to histone H4                 | Hist2h4  | 2.83 | 0.18 | A_51_P426975 | NM_033596    |
| potassium channel tetramerisation domain containing 17       | Kctd17   | 2.82 | 0.24 | A_52_P35057  | NM_001081367 |
| Rac GTPase-activating protein 1; predicted gene 1859         | Racgap1  | 2.82 | 0.24 | A_51_P243750 | NM_012025    |
| RIKEN cDNA 4931408D14 gene                                   | 08D14Rik | 2.81 | 0.00 | A_51_P480020 | AK016444     |
| GIPC PDZ domain containing family, member 2                  | Gipc2    | 2.81 | 0.18 | A_51_P446131 | NM_016867    |
|                                                              | Hist1h   |      |      |              |              |
| histone cluster 1, H2af                                      | 2af      | 2.81 | 0.00 | A_52_P498210 | NM_175661    |
| Rho GTPase activating protein 25                             | Arhgap25 | 2.80 | 0.30 | A_51_P248629 | NM_175476    |
| cyclin D1                                                    | Ccnd1    | 2.79 | 0.00 | A_51_P262766 | NM_007631    |
| myoferlin                                                    | Fer113   | 2.79 | 0.30 | A_51_P378589 | XM_283556    |
| tubulin, beta 5                                              | Tubb5    | 2.79 | 0.00 | A_52_P163795 | NM_011655    |
| predicted gene 15428;                                        | 28104    |      |      |              |              |
| RIKEN cDNA 2810417H13 gene; predicted gene 9171              | 17H13Rik | 2.78 | 0.00 | A_52_P13448  | NM_026515    |
| pannexin 1                                                   | Panx1    | 2.77 | 0.55 | A_51_P135340 | NM_019482    |
| histone cluster 1, H4k;                                      |          |      |      |              |              |
| histone cluster 1, H4m;                                      |          |      |      |              |              |
| histone cluster 4, H4; similar to germinal histone H4 gene;  |          |      |      |              |              |
| histone cluster 1, H4h;                                      | Hist1h4f | 2.76 | 0.18 | A_52_P52964  | NM_175655    |

|                                                                                                                                                                                                                                                                                                                                                                                                 |                       |      |      |              |           |  |
|-------------------------------------------------------------------------------------------------------------------------------------------------------------------------------------------------------------------------------------------------------------------------------------------------------------------------------------------------------------------------------------------------|-----------------------|------|------|--------------|-----------|--|
| histone cluster 1, H4j;<br>histone cluster 1, H4i;<br>histone cluster 1, H4d;<br>histone cluster 1, H4c;<br>histone cluster 1, H4f;<br>histone cluster 1, H4b;<br>histone cluster 1, H4a;<br>histone cluster 2, H4; similar<br>to histone H4                                                                                                                                                    |                       |      |      |              |           |  |
| lysyl oxidase-like 2                                                                                                                                                                                                                                                                                                                                                                            | Loxl2                 | 2.75 | 0.28 | A_52_P480351 | NM_033325 |  |
| low density lipoprotein-<br>related protein 12                                                                                                                                                                                                                                                                                                                                                  | Lrp12                 | 2.75 | 0.28 | A_51_P200484 | NM_172814 |  |
| ect2 oncogene                                                                                                                                                                                                                                                                                                                                                                                   | Ect2                  | 2.75 | 0.30 | A_51_P130015 | NM_007900 |  |
| tetraspanin 8                                                                                                                                                                                                                                                                                                                                                                                   | Tspan8                | 2.75 | 0.28 | A_52_P306744 | NM_146010 |  |
| FXYP domain-containing<br>ion transport regulator 5                                                                                                                                                                                                                                                                                                                                             | Fxyd5                 | 2.75 | 0.28 | A_51_P381260 | NM_008761 |  |
| DNA primase, p49 subunit                                                                                                                                                                                                                                                                                                                                                                        | Prim1                 | 2.74 | 0.28 | A_51_P168632 | NM_008921 |  |
| neuron derived neurotrophic<br>factor                                                                                                                                                                                                                                                                                                                                                           | Nenf<br>28100         | 2.72 | 0.28 | A_51_P126987 | NM_025424 |  |
| RIKEN cDNA 2810022L02<br>gene                                                                                                                                                                                                                                                                                                                                                                   | 22L02<br>Rik          | 2.71 | 0.24 | A_51_P202911 | NM_144882 |  |
| establishment of cohesion 1<br>homolog 2 ( <i>S. cerevisiae</i> )                                                                                                                                                                                                                                                                                                                               | Esco2                 | 2.71 | 0.55 | A_51_P195034 | NM_028039 |  |
| ST3 beta-galactoside alpha-<br>2,3-sialyltransferase 2                                                                                                                                                                                                                                                                                                                                          | St3gal<br>2<br>28100  | 2.70 | 0.13 | A_52_P408530 | NM_178048 |  |
| coiled-coil domain<br>containing 34                                                                                                                                                                                                                                                                                                                                                             | 27O19<br>Rik<br>A3300 | 2.68 | 0.44 | A_51_P312482 | NM_026613 |  |
| RIKEN cDNA A330021E22<br>gene                                                                                                                                                                                                                                                                                                                                                                   | 21E22<br>Rik          | 2.65 | 0.00 | A_51_P116601 | NM_172447 |  |
| transgelin 2                                                                                                                                                                                                                                                                                                                                                                                    | Tagln2                | 2.65 | 0.28 | A_52_P35240  | NM_178598 |  |
| cytochrome b-245, alpha<br>polypeptide                                                                                                                                                                                                                                                                                                                                                          | Cyba                  | 2.64 | 0.80 | A_51_P131800 | NM_007806 |  |
| coronin, actin binding protein<br>1A                                                                                                                                                                                                                                                                                                                                                            | Coro1a                | 2.64 | 0.30 | A_51_P300277 | NM_009898 |  |
| histone cluster 1, H4k;<br>histone cluster 1, H4m;<br>histone cluster 4, H4; similar<br>to germinal histone H4 gene;<br>histone cluster 1, H4h;<br>histone cluster 1, H4j;<br>histone cluster 1, H4i;<br>histone cluster 1, H4d;<br>histone cluster 1, H4c;<br>histone cluster 1, H4f;<br>histone cluster 1, H4b;<br>histone cluster 1, H4a;<br>histone cluster 2, H4; similar<br>to histone H4 | Hist1h<br>4d          | 2.64 | 0.24 | A_51_P136097 | NM_175654 |  |

|                                                                                      |              |      |      |              |             |
|--------------------------------------------------------------------------------------|--------------|------|------|--------------|-------------|
| epithelial membrane protein 1                                                        | Emp1         | 2.63 | 0.44 | A_52_P120037 | NM_010128   |
| xylosyltransferase 1                                                                 | Xylt1        | 2.63 | 0.28 | A_51_P205913 | NM_175645   |
| guanine nucleotide binding protein (G protein), gamma 11                             | Gng11        | 2.62 | 0.92 | A_51_P136355 | NM_025331   |
| kinesin family member 20A                                                            | Kif20a       | 2.62 | 0.00 | A_51_P133138 | Y09632      |
| RIKEN cDNA 6330439K17 gene                                                           | 39F03<br>Rik | 2.62 | 0.18 | A_51_P237548 | NM_172859   |
| bicaudal C homolog 1 (Drosophila)                                                    | Bicc1        | 2.61 | 0.28 | A_51_P356493 | NM_031397   |
| Fc receptor, IgE, high affinity I, gamma polypeptide                                 | Fcer1g       | 2.60 | 0.44 | A_51_P405476 | NM_010185   |
| Max dimerization protein 3 linker for activation of T cells family, member 2         | Mxd3         | 2.60 | 0.00 | A_51_P315530 | NM_016662   |
| integrin alpha X                                                                     | Lat2         | 2.59 | 0.28 | A_51_P242930 | NM_022964   |
| S100 calcium binding protein G                                                       | Itgax        | 2.59 | 0.30 | A_51_P303424 | NM_021334   |
| transcription factor 19                                                              | S100g        | 2.58 | 0.28 | A_51_P118545 | NM_009789   |
| mitogen-activated protein kinase kinase kinase 4                                     | Tcf19        | 2.58 | 0.30 | A_51_P505172 | NM_025674   |
| ATP-binding cassette, sub-family D (ALD), member 2                                   | 80K19<br>Rik | 2.58 | 0.18 | A_51_P439876 | AK020498    |
| ras homolog gene family, member C                                                    | Abcd2        | 2.58 | 0.28 | A_51_P249302 | NM_011994   |
| amyloid beta (A4) precursor protein                                                  | Rhoc         | 2.57 | 0.18 | A_51_P282508 | NM_007484   |
| tropomyosin 1, alpha                                                                 | App          | 2.57 | 0.40 | A_52_P468472 | NM_007471   |
| tumor necrosis factor receptor superfamily, member 12a                               | Tpm1         | 2.57 | 0.00 | A_52_P44949  | NM_024427   |
| integrin beta 2                                                                      | Tnfrsf12a    | 2.56 | 0.00 | A_51_P131408 | NM_013749   |
| kinesin family member 22                                                             | Itgb2        | 2.56 | 0.67 | A_51_P262208 | NM_008404   |
| RIKEN cDNA B830017H08 gene                                                           | Kif22        | 2.56 | 0.24 | A_51_P493467 | NM_145588   |
| endothelin receptor type B                                                           | B8300        |      |      |              | NM_00100279 |
| myosin IF                                                                            | 17H08<br>Rik | 2.55 | 0.28 | A_52_P131249 | 0           |
| RNA polymerase II associated protein 3; predicted gene 5697                          | Ednrb        | 2.55 | 0.92 | A_52_P577662 | NM_007904   |
| filamin, alpha                                                                       | Myo1f        | 2.52 | 0.28 | A_52_P113190 | NM_053214   |
| chromobox homolog 6; neuronal pentraxin receptor; Cbx6-Nptxr readthrough transcripts | D15Ert       |      |      |              |             |
| cell growth regulator with EF                                                        | d682e        | 2.52 | 0.80 | A_51_P354154 | NM_028003   |
|                                                                                      | Flna         | 2.51 | 0.40 | A_51_P151828 | BC038478    |
|                                                                                      | Cbx6         | 2.51 | 0.40 | A_51_P391764 | NM_028763   |
|                                                                                      | Cgref1       | 2.50 | 0.18 | A_51_P372550 | BC023116    |

|                                                             |          |      |      |              |           |
|-------------------------------------------------------------|----------|------|------|--------------|-----------|
| hand domain 1                                               |          |      |      |              |           |
| WW domain binding protein 5                                 | Wbp5     | 2.50 | 0.00 | A_51_P139848 | NM_011712 |
| prominin 1                                                  | Prom1    | 2.49 | 0.24 | A_51_P414072 | NM_008935 |
| brain glycogen phosphorylase                                | Pygb     | 2.49 | 0.00 | A_52_P350664 | NM_153781 |
| inhibitor of DNA binding 1                                  | Id1      | 2.49 | 0.55 | A_51_P385786 | NM_010495 |
|                                                             | 28104    |      |      |              |           |
| RIKEN cDNA 2810433K01 gene                                  | 33K01    |      |      |              |           |
|                                                             | Rik      | 2.48 | 0.28 | A_52_P139650 | NM_025581 |
| ATPase, Ca <sup>++</sup> transporting, plasma membrane 2    | Atp2b2   | 2.48 | 0.40 | A_51_P256384 | NM_009723 |
| retinol dehydrogenase 5                                     | Rdh5     | 2.47 | 0.00 | A_51_P479618 | NM_134006 |
|                                                             | 06100    |      |      |              |           |
| small nucleolar RNA, C/D box 123                            | 07N19    |      |      |              |           |
|                                                             | Rik      | 2.47 | 0.28 | A_52_P670812 | AK002304  |
| apolipoprotein A-IV                                         | Apoa4    | 2.47 | 0.80 | A_51_P327491 | NM_007468 |
| peptidylprolyl isomerase C                                  | Ppic     | 2.47 | 0.28 | A_51_P161086 | NM_008908 |
| predicted gene 6665; glutathione S-transferase, mu 2        | Gstm2    | 2.46 | 0.24 | A_51_P284486 | NM_008183 |
|                                                             | Fkbp1    |      |      |              |           |
| FK506 binding protein 10                                    | 0        | 2.46 | 0.28 | A_51_P216965 | NM_010221 |
| nodal                                                       | Nodal    | 2.45 | 0.28 | A_52_P633560 | X70514    |
| renin binding protein                                       | Renbp    | 2.45 | 0.28 | A_51_P123765 | NM_023132 |
| apelin                                                      | Apln     | 2.44 | 0.28 | A_51_P209327 | NM_013912 |
| leupaxin                                                    | Lpxn     | 2.44 | 0.55 | A_52_P577748 | NM_134152 |
| keratinocyte associated protein 3                           | Krtcap3  | 2.43 | 0.00 | A_51_P476559 | NM_027221 |
| C1q and tumor necrosis factor related protein 6             | C1qtnf6  | 2.43 | 0.28 | A_52_P405177 | NM_028331 |
| signal peptide, CUB domain, EGF-like 1                      | Scube1   | 2.42 | 0.00 | A_51_P447595 | NM_022723 |
| thrombospondin 2                                            | Thbs2    | 2.42 | 0.00 | A_51_P461877 | NM_011581 |
| solute carrier family 15, member 3                          | Slc15a3  | 2.42 | 0.67 | A_52_P467389 | NM_023044 |
| retinol binding protein 1, cellular                         | Rbp1     | 2.41 | 0.24 | A_51_P423484 | NM_011254 |
| histone cluster 1, H4k;                                     |          |      |      |              |           |
| histone cluster 1, H4m;                                     |          |      |      |              |           |
| histone cluster 4, H4; similar to germinal histone H4 gene; |          |      |      |              |           |
| histone cluster 1, H4h;                                     |          |      |      |              |           |
| histone cluster 1, H4j;                                     |          |      |      |              |           |
| histone cluster 1, H4i;                                     |          |      |      |              |           |
| histone cluster 1, H4d;                                     |          |      |      |              |           |
| histone cluster 1, H4c;                                     |          |      |      |              |           |
| histone cluster 1, H4f;                                     |          |      |      |              |           |
| histone cluster 1, H4b;                                     | Hist1h4i | 2.41 | 0.28 | A_51_P505521 | NM_175656 |
| histone cluster 1, H4a;                                     | 4i       |      |      |              |           |

|                                                                                                                             |           |      |      |              |           |
|-----------------------------------------------------------------------------------------------------------------------------|-----------|------|------|--------------|-----------|
| histone cluster 2, H4; similar to histone H4                                                                                |           |      |      |              |           |
|                                                                                                                             | C4300     |      |      |              |           |
| RIKEN cDNA C430004E15                                                                                                       | 04E15     |      |      |              |           |
| gene                                                                                                                        | Rik       | 2.41 | 0.24 | A_51_P176661 | NM_175286 |
| mucin 6, gastric                                                                                                            | Muc6      | 2.41 | 0.30 | A_51_P256407 | NM_181729 |
| similar to CLM3; CMRF-35-like molecule 3                                                                                    | Clm3      | 2.40 | 0.28 | A_52_P275786 | NM_199201 |
| histone cluster 2, H3b;                                                                                                     |           |      |      |              |           |
| histone cluster 1, H3f;                                                                                                     |           |      |      |              |           |
| histone cluster 1, H3e;                                                                                                     |           |      |      |              |           |
| histone cluster 2, H3c1;                                                                                                    |           |      |      |              |           |
| histone cluster 1, H3d;                                                                                                     |           |      |      |              |           |
| histone cluster 1, H3c;                                                                                                     |           |      |      |              |           |
| histone cluster 1, H3b;                                                                                                     |           |      |      |              |           |
| histone cluster 2, H3c2;                                                                                                    |           |      |      |              |           |
| histone cluster 2, H2aa1;                                                                                                   | Hist2h    |      |      |              |           |
| histone cluster 2, H2aa2                                                                                                    | 2aa1      | 2.40 | 0.00 | A_52_P64609  | NM_013549 |
| Rho, GDP dissociation                                                                                                       | Arhgd1    |      |      |              |           |
| inhibitor (GDI) beta                                                                                                        | b         | 2.40 | 0.44 | A_52_P515247 | NM_007486 |
| cathepsin B                                                                                                                 | Ctsb      | 2.40 | 0.28 | A_52_P433889 | NM_007798 |
| retinoblastoma-like 1 (p107)                                                                                                | Rbl1      | 2.39 | 0.00 | A_51_P286665 | NM_011249 |
| pleckstrin homology domain containing, family O member 1                                                                    | Plekho1   | 2.39 | 0.67 | A_51_P509971 | NM_023320 |
| expressed sequence                                                                                                          | AW14      |      |      |              |           |
| AW146242                                                                                                                    | 6242      | 2.39 | 0.28 | A_51_P338040 | NM_146168 |
| integrin alpha 6                                                                                                            | Itga6     | 2.38 | 0.18 | A_52_P81270  | NM_008397 |
| nestin                                                                                                                      | Nes       | 2.38 | 0.00 | A_51_P452323 | NM_016701 |
|                                                                                                                             | 18100     |      |      |              |           |
|                                                                                                                             | 15A11     |      |      |              |           |
| YdjC homolog (bacterial)                                                                                                    | Rik       | 2.38 | 0.28 | A_52_P162298 | NM_026940 |
| pleckstrin homology domain containing, family O member 2                                                                    | Plekhq1   | 2.38 | 0.28 | A_51_P293982 | NM_153119 |
| hematopoietic cell signal transducer                                                                                        | Hcst      | 2.38 | 0.40 | A_52_P170188 | NM_011827 |
| ubiquitin-like, containing PHD and RING finger domains, 1; predicted gene 5648; similar to nuclear zinc finger protein Np95 | Uhrf1     | 2.37 | 0.00 | A_51_P491742 | NM_010931 |
|                                                                                                                             | 31100     |      |      |              |           |
| platelet endothelial aggregation receptor 1                                                                                 | Rik       | 2.37 | 0.28 | A_52_P278295 | NM_028460 |
| follistatin-like 1                                                                                                          | Fstl1     | 2.37 | 0.44 | A_51_P215106 | NM_008047 |
| predicted gene 5353;                                                                                                        |           |      |      |              |           |
| immunoglobulin heavy chain (J558 family); similar to Ig heavy chain V region 108A precursor; similar to Ig heavy            | Igh-VJ558 | 2.37 | 0.28 | A_51_P509679 | BC004786  |



|                                                                                                                                                                                                                                   |               |      |      |              |             |
|-----------------------------------------------------------------------------------------------------------------------------------------------------------------------------------------------------------------------------------|---------------|------|------|--------------|-------------|
| chain V-I region V35<br>precursor; predicted gene<br>900; immunoglobulin heavy<br>chain complex; similar to Ig<br>H-chain V-JH1-region;<br>immunoglobulin heavy<br>variable V1-31;<br>immunoglobulin heavy chain<br>2 (serum IgA) |               |      |      |              |             |
| angiopoietin 2                                                                                                                                                                                                                    | Angpt<br>2    | 2.36 | 0.28 | A_51_P201982 | NM_007426   |
| tandem C2 domains, nuclear<br>solute carrier family 13<br>(sodium-dependent<br>dicarboxylate transporter),<br>member 3                                                                                                            | Mtac2<br>d1   | 2.36 | 0.30 | A_51_P161410 | NM_028924   |
| protocadherin gamma<br>subfamily A, 7<br>membrane protein,<br>palmitoylated                                                                                                                                                       | Slc13a<br>3   | 2.36 | 0.44 | A_51_P233768 | NM_054055   |
| echinoderm microtubule<br>associated protein like 1;<br>similar to echinoderm<br>microtubule associated<br>protein like 1                                                                                                         | Pcdhga<br>7   | 2.35 | 0.44 | A_51_P474518 | NM_033590   |
| tetraspanin 6                                                                                                                                                                                                                     | Mpp1          | 2.35 | 0.28 | A_51_P124568 | NM_008621   |
| solute carrier family 38,<br>member 1                                                                                                                                                                                             |               |      |      |              | NM_00104333 |
| non-SMC condensin I<br>complex, subunit H                                                                                                                                                                                         | Eml1          | 2.35 | 0.55 | A_51_P421279 | 5           |
| histone cluster 1, H2aa                                                                                                                                                                                                           | Tspan6        | 2.35 | 0.40 | A_51_P473272 | NM_019656   |
| G protein-coupled receptor<br>120                                                                                                                                                                                                 | Slc38a<br>1   | 2.34 | 0.28 | A_51_P133005 | AK162429    |
| transmembrane protein 88                                                                                                                                                                                                          | Brrn1         | 2.34 | 0.13 | A_52_P363039 | NM_144818   |
| minichromosome<br>maintenance deficient 3 (S.<br>cerevisiae)                                                                                                                                                                      | Hist1h<br>2aa | 2.34 | 0.80 | A_51_P405773 | NM_175658   |
| collectin sub-family member<br>10                                                                                                                                                                                                 | Gpr12<br>0    | 2.33 | 0.18 | A_52_P503663 | NM_181748   |
| C-type lectin domain family<br>4, member d                                                                                                                                                                                        | Tmem<br>88    | 2.33 | 0.40 | A_52_P209484 | NM_025915   |
| embigin                                                                                                                                                                                                                           | Mcm3          | 2.33 | 0.24 | A_52_P364776 | NM_008563   |
| thioredoxin-related                                                                                                                                                                                                               | Colec1<br>0   | 2.33 | 0.92 | A_51_P144160 | NM_173422   |
| transmembrane protein 4                                                                                                                                                                                                           | Clec4d        | 2.33 | 0.92 | A_51_P383032 | NM_010819   |
| mitogen-activated protein<br>kinase kinase kinase 1                                                                                                                                                                               | Emb           | 2.32 | 0.30 | A_51_P382849 | NM_010330   |
| chemokine-like factor                                                                                                                                                                                                             | Txndc<br>13   | 2.31 | 0.92 | A_51_P319379 | BC054558    |
| histone cluster 2, H2ac                                                                                                                                                                                                           | Map4k<br>1    | 2.31 | 0.44 | A_52_P552589 | NM_008279   |
|                                                                                                                                                                                                                                   | Cklf          | 2.30 | 0.40 | A_51_P394715 | NM_029295   |
|                                                                                                                                                                                                                                   | Hist2h        | 2.30 | 0.00 | A_52_P340480 | NM_175662   |

|                                                                                                                                                                                             | 2ac      |      |      |              |           |
|---------------------------------------------------------------------------------------------------------------------------------------------------------------------------------------------|----------|------|------|--------------|-----------|
| retinoic acid early transcript 1E; retinoic acid early transcript beta; retinoic acid early transcript 1, alpha; retinoic acid early transcript delta; retinoic acid early transcript gamma | Raet1a   | 2.30 | 0.40 | A_51_P256766 | NM_009016 |
| similar to spermidine/spermine N1-acetyltransferase; predicted gene 5552; spermidine/spermine N1-acetyl transferase 1                                                                       | Sat1     | 2.30 | 0.28 | A_51_P348494 | NM_009121 |
| oligophrenin 1                                                                                                                                                                              | Ophn1    | 2.29 | 0.55 | A_51_P161724 | NM_052976 |
| annexin A5                                                                                                                                                                                  | Anxa5    | 2.29 | 0.28 | A_51_P426754 | NM_009673 |
| Fanconi anemia, complementation group I                                                                                                                                                     | BC025462 | 2.29 | 0.00 | A_51_P441843 | NM_145946 |
| topoisomerase (DNA) II alpha                                                                                                                                                                | Top2a    | 2.29 | 0.00 | A_51_P252157 | NM_011623 |
| solute carrier family 1 (glutamate/neutral amino acid transporter), member 4                                                                                                                | Slc1a4   | 2.29 | 0.00 | A_52_P273098 | NM_018861 |
| cadherin 1                                                                                                                                                                                  | Cdh1     | 2.29 | 0.28 | A_51_P137336 | NM_009864 |
| WAP four-disulfide core domain 15B                                                                                                                                                          | Wfdc15   | 2.29 | 0.28 | A_51_P462708 | NM_138685 |
| collagen, type VI, alpha 2                                                                                                                                                                  | Col6a2   | 2.29 | 0.55 | A_51_P279639 | NM_146007 |
| IQ motif containing GTPase activating protein 3                                                                                                                                             | Iqgap3   | 2.28 | 0.00 | A_52_P588881 | BC068159  |
| protein phosphatase 1, regulatory subunit 9B                                                                                                                                                | Ppp1r9b  | 2.28 | 0.30 | A_51_P402484 | NM_172261 |
| similar to cytoplasmic dynein light chain 1; predicted gene 11582; dynein light chain LC8-type 1; predicted gene 6788                                                                       | Dynll1   | 2.28 | 0.28 | A_51_P414518 | NM_019682 |
| chemokine (C-X-C motif) receptor 4                                                                                                                                                          | Cxcr4    | 2.28 | 0.55 | A_52_P585124 | NM_009911 |
| catechol-O-methyltransferase domain containing 1                                                                                                                                            | Comtd1   | 2.27 | 0.24 | A_52_P469381 | NM_026965 |
| similar to Saccharopine dehydrogenase (putative); saccharopine dehydrogenase (putative)                                                                                                     | Sccpdh   | 2.27 | 0.28 | A_51_P162773 | NM_178653 |
| transcription elongation factor A (SII)-like 8; similar to transcription elongation factor A (SII)-like 8                                                                                   | Tceal8   | 2.27 | 0.28 | A_51_P135379 | NM_025703 |
| complement component 3a receptor 1                                                                                                                                                          | C3ar1    | 2.26 | 0.28 | A_51_P282557 | NM_009779 |
| transmembrane protein 86A                                                                                                                                                                   | Tmem86a  | 2.26 | 0.18 | A_51_P314285 | NM_026436 |

|                                                                                                                                                                                                                                                                                                             | 86a      |      |      |              |           |
|-------------------------------------------------------------------------------------------------------------------------------------------------------------------------------------------------------------------------------------------------------------------------------------------------------------|----------|------|------|--------------|-----------|
| flavin containing monooxygenase 2                                                                                                                                                                                                                                                                           | Fmo2     | 2.26 | 0.55 | A_51_P301998 | NM_018881 |
| retinoic acid receptor, beta intercellular adhesion molecule 2                                                                                                                                                                                                                                              | Rarb     | 2.26 | 0.40 | A_51_P202440 | NM_011243 |
|                                                                                                                                                                                                                                                                                                             | Icam2    | 2.25 | 0.28 | A_51_P267754 | NM_010494 |
|                                                                                                                                                                                                                                                                                                             | 90306    |      |      |              |           |
| RIKEN cDNA 9030625A04 gene                                                                                                                                                                                                                                                                                  | 25A04    |      |      |              |           |
|                                                                                                                                                                                                                                                                                                             | Rik      | 2.25 | 0.24 | A_51_P427171 | NM_172488 |
| cytokine receptor-like factor 1                                                                                                                                                                                                                                                                             | Crlf1    | 2.24 | 0.55 | A_51_P156108 | NM_018827 |
| peptidyl-tRNA hydrolase 1 homolog ( <i>S. cerevisiae</i> )                                                                                                                                                                                                                                                  | Pthr1    | 2.24 | 0.28 | A_52_P605812 | NM_178595 |
| guanine nucleotide binding protein (G protein), gamma transducing activity polypeptide 2                                                                                                                                                                                                                    | Gngt2    | 2.23 | 0.80 | A_52_P44824  | NM_023121 |
|                                                                                                                                                                                                                                                                                                             | 12000    |      |      |              |           |
| RIKEN cDNA 1200009F10 gene                                                                                                                                                                                                                                                                                  | 09F10    |      |      |              |           |
|                                                                                                                                                                                                                                                                                                             | Rik      | 2.22 | 0.28 | A_52_P417694 | NM_027078 |
| acyl-CoA thioesterase 9                                                                                                                                                                                                                                                                                     | Acot9    | 2.22 | 0.92 | A_52_P392674 | NM_019736 |
| SEC14 and spectrin domains 1; predicted gene 9165                                                                                                                                                                                                                                                           | Sestd1   | 2.22 | 0.24 | A_51_P349166 | NM_175465 |
| coiled-coil domain containing 120                                                                                                                                                                                                                                                                           | Ccdc1    | 2.22 | 0.28 | A_51_P159610 | NM_207202 |
| fidgetin-like 1                                                                                                                                                                                                                                                                                             | Figl1    | 2.22 | 0.28 | A_52_P148553 | NM_021891 |
| amyloid beta (A4) precursor-like protein 1                                                                                                                                                                                                                                                                  | Aplp1    | 2.21 | 0.28 | A_51_P432380 | NM_007467 |
| serine/threonine kinase 10                                                                                                                                                                                                                                                                                  | Stk10    | 2.21 | 0.44 | A_51_P192130 | NM_009288 |
| insulin-like growth factor binding protein 3                                                                                                                                                                                                                                                                | Igfbp3   | 2.21 | 0.28 | A_52_P253179 | BC058261  |
| epithelial membrane protein 3                                                                                                                                                                                                                                                                               | Emp3     | 2.20 | 0.28 | A_51_P446510 | NM_010129 |
| pyrroline-5-carboxylate reductase family, member 2                                                                                                                                                                                                                                                          | Pycr2    | 2.20 | 0.18 | A_51_P249051 | NM_133705 |
| RNA component of mitochondrial RNAase P                                                                                                                                                                                                                                                                     | Rmrp     | 2.20 | 0.44 | A_52_P2670   | NR_001460 |
| histone cluster 1, H4k; histone cluster 1, H4m; histone cluster 4, H4; similar to germinal histone H4 gene; histone cluster 1, H4h; histone cluster 1, H4j; histone cluster 1, H4i; histone cluster 1, H4d; histone cluster 1, H4c; histone cluster 1, H4f; histone cluster 1, H4b; histone cluster 1, H4a; |          |      |      |              |           |
| histone cluster 2, H4; similar to histone H4                                                                                                                                                                                                                                                                | Hist1h4a | 2.19 | 0.28 | A_51_P412050 | NM_178192 |

|                                                                                                                                                                                                                                                                                                                                                     |                 |      |      |              |           |
|-----------------------------------------------------------------------------------------------------------------------------------------------------------------------------------------------------------------------------------------------------------------------------------------------------------------------------------------------------|-----------------|------|------|--------------|-----------|
| microtubule associated<br>monoxygenase, calponin and<br>LIM domain containing 1                                                                                                                                                                                                                                                                     | Mical1          | 2.19 | 0.40 | A_51_P356760 | NM_138315 |
| twinfilin, actin-binding<br>protein, homolog 2<br>(Drosophila)                                                                                                                                                                                                                                                                                      | Ptk91<br>Hspba  | 2.19 | 0.30 | A_51_P280304 | NM_011876 |
| Hspb associated protein 1                                                                                                                                                                                                                                                                                                                           | p1              | 2.19 | 0.00 | A_52_P43994  | NM_175111 |
| GATS protein-like 2                                                                                                                                                                                                                                                                                                                                 | Gats            | 2.18 | 0.28 | A_52_P89267  | BC026208  |
| neutrophil cytosolic factor 4                                                                                                                                                                                                                                                                                                                       | Ncf4            | 2.18 | 0.28 | A_51_P377452 | NM_008677 |
| major facilitator superfamily<br>domain containing 7C                                                                                                                                                                                                                                                                                               | BC011<br>209    | 2.18 | 0.55 | A_51_P386899 | NM_145447 |
| interleukin 1 receptor<br>antagonist                                                                                                                                                                                                                                                                                                                | Il1rn           | 2.18 | 0.28 | A_52_P431159 | NM_031167 |
| histone cluster 1, H2ad;<br>histone cluster 1, H2ae;<br>histone cluster 1, H2ag;<br>histone cluster 1, H2ah;<br>histone cluster 1, H2ai;<br>similar to histone 2a; histone<br>cluster 1, H2an; histone<br>cluster 1, H2ao; histone<br>cluster 1, H2ac; histone<br>cluster 1, H2ab                                                                   | Hist1h<br>2ai   | 2.18 | 0.00 | A_52_P651235 | NM_178182 |
| predicted gene 8697; similar<br>to large subunit ribosomal<br>protein L36a; predicted gene<br>11970; predicted gene 10077;<br>similar to ribosomal protein<br>L36a; predicted gene 2718;<br>predicted gene 10316;<br>predicted gene 8001;<br>predicted gene 6525;<br>predicted gene 9409;<br>ribosomal protein L36A;<br>ribosomal protein L36A-like | Rpl36a          | 2.17 | 0.55 | A_52_P197926 | NM_019865 |
| glycogenin                                                                                                                                                                                                                                                                                                                                          | Gyg             | 2.17 | 0.30 | A_51_P240019 | NM_013755 |
| plasminogen activator,<br>urokinase receptor                                                                                                                                                                                                                                                                                                        | Plaur<br>57305  | 2.17 | 0.30 | A_52_P681310 | NM_011113 |
| non-SMC condensin I<br>complex, subunit G                                                                                                                                                                                                                                                                                                           | 07H05<br>Rik    | 2.16 | 0.28 | A_52_P324584 | AJ237585  |
| annexin A13                                                                                                                                                                                                                                                                                                                                         | Anxa1<br>3      | 2.16 | 0.18 | A_51_P296737 | NM_027211 |
| predicted gene, EG240055                                                                                                                                                                                                                                                                                                                            | C2300<br>78M08  | 2.16 | 0.28 | A_51_P232868 | NM_176995 |
| solute carrier family 6<br>(neurotransmitter transporter,<br>creatine), member 8                                                                                                                                                                                                                                                                    | Rik             | 2.16 | 0.28 | A_51_P232868 | NM_176995 |
| RIKEN cDNA 1810011H11                                                                                                                                                                                                                                                                                                                               | Slc6a8<br>18100 | 2.16 | 0.18 | A_51_P450829 | NM_133987 |
|                                                                                                                                                                                                                                                                                                                                                     |                 | 2.16 | 0.80 | A_52_P308413 | AK007434  |

|                                                                                                                                                                                                                                                |                                |              |              |                              |                        |
|------------------------------------------------------------------------------------------------------------------------------------------------------------------------------------------------------------------------------------------------|--------------------------------|--------------|--------------|------------------------------|------------------------|
| gene                                                                                                                                                                                                                                           | 11H11<br>Rik<br>22104<br>10P13 |              |              |                              |                        |
| zinc finger protein 84                                                                                                                                                                                                                         | Rik                            | 2.16         | 0.55         | A_51_P128775                 | AK008890               |
| elastin                                                                                                                                                                                                                                        | Eln                            | 2.16         | 0.00         | A_52_P609972                 | NM_007925              |
| solute carrier family 25<br>(mitochondrial carrier,<br>phosphate carrier), member<br>24                                                                                                                                                        | Slc25a<br>24<br>Pcdh2          | 2.16         | 0.80         | A_52_P515057                 | NM_172685              |
| protocadherin 20<br>inter-alpha (globulin)<br>inhibitor H5                                                                                                                                                                                     | 0                              | 2.16         | 0.80         | A_52_P250400                 | NM_178685              |
| cyclin-dependent kinase<br>inhibitor 1A (P21)                                                                                                                                                                                                  | Itih5<br>Cdkn1<br>a            | 2.15<br>2.14 | 0.28<br>0.28 | A_51_P364250<br>A_51_P363947 | NM_172471<br>NM_007669 |
| predicted gene 13160;<br>predicted gene 8681;<br>predicted gene 13237;<br>predicted gene 4169;<br>predicted gene 8284; similar<br>to High mobility group box<br>2; predicted gene 13167;<br>high mobility group box 2;<br>predicted gene 13232 | Hmgb<br>2                      | 2.14         | 0.28         | A_52_P485417                 | NM_008252              |
| microrchidia 4                                                                                                                                                                                                                                 | Morc4                          | 2.14         | 0.28         | A_52_P147816                 | NM_029413              |
| mitogen-activated protein<br>kinase 7                                                                                                                                                                                                          | Mapk7<br>Tmem<br>45a           | 2.14         | 0.28         | A_51_P359018                 | NM_011841              |
| transmembrane protein 45a<br>ATP-binding cassette, sub-<br>family G (WHITE), member<br>1                                                                                                                                                       | Abcg1                          | 2.14         | 0.28         | A_51_P288876                 | NM_019631              |
| bicaudal C homolog 1<br>(Drosophila)                                                                                                                                                                                                           | Bicc1                          | 2.13         | 0.30         | A_51_P222467                 | NM_009593              |
| solute carrier family 7<br>(cationic amino acid<br>transporter, y+ system),<br>member 8                                                                                                                                                        | Slc7a8<br>E1301<br>19H09       | 2.13         | 0.80         | A_51_P112734                 | NM_016972              |
| RIKEN cDNA E130119H09<br>gene                                                                                                                                                                                                                  | Rik                            | 2.12         | 0.80         | A_51_P441745                 | AK021396               |
| DNA-damage-inducible<br>transcript 4-like<br>predicted gene 11942;<br>predicted gene 13777;<br>predicted gene 10073;                                                                                                                           | Ddit4l<br>LOC2<br>79067        | 2.12         | 0.18         | A_52_P541752                 | NM_030143              |
| ribosomal protein, large, P1<br>Shc SH2-domain binding<br>protein 1                                                                                                                                                                            | Shcbp<br>1                     | 2.12         | 0.67         | A_52_P84803                  | XM_205095              |
| ADP-ribosylation factor-like                                                                                                                                                                                                                   | Arl2bp                         | 2.12         | 0.44         | A_51_P204402                 | NM_011369              |
|                                                                                                                                                                                                                                                |                                | 2.12         | 0.28         | A_51_P396752                 | NM_024191              |

|                                                                              |               |      |      |              |           |  |
|------------------------------------------------------------------------------|---------------|------|------|--------------|-----------|--|
| 2 binding protein                                                            |               |      |      |              |           |  |
| mitogen-activated protein kinase kinase kinase 4                             | Map4k4        | 2.12 | 0.18 | A_51_P268053 | NM_008696 |  |
| poliovirus receptor protein kinase, membrane associated tyrosine/threonine 1 | Pvr           | 2.12 | 0.24 | A_52_P162695 | NM_027514 |  |
| predicted gene 5366; tubulin, alpha 3B; tubulin, alpha 3A                    | Pkmyt1        | 2.11 | 0.00 | A_51_P312360 | NM_023058 |  |
| unc-119 homolog (C. elegans)                                                 | Tuba3         | 2.11 | 0.28 | A_51_P145404 | NM_009446 |  |
| CD53 antigen                                                                 | Unc119        | 2.11 | 0.00 | A_51_P201638 | NM_011676 |  |
| procollagen lysine, 2-oxoglutarate 5-dioxygenase 2                           | Cd53          | 2.11 | 0.28 | A_51_P337675 | NM_007651 |  |
| CD9 antigen                                                                  | Plod2         | 2.11 | 0.00 | A_51_P396570 | NM_011961 |  |
| nudix (nucleoside diphosphate linked moiety X)-type motif 18                 | Cd9           | 2.11 | 0.30 | A_51_P320852 | NM_007657 |  |
| roundabout homolog 1 (Drosophila)                                            | Nudt18        | 2.11 | 0.30 | A_52_P492601 | NM_153136 |  |
| CDC42 effector protein (Rho GTPase binding) 2                                | Robo1         | 2.10 | 0.00 | A_51_P174314 | NM_019413 |  |
| tetratricopeptide repeat domain 9B                                           | Cdc42ep2      | 2.10 | 0.30 | A_52_P155554 | NM_026772 |  |
| immunoglobulin-like domain containing receptor 2                             | Ttc9b         | 2.10 | 0.44 | A_51_P358894 | BC089566  |  |
| calcium/calmodulin-dependent protein kinase II inhibitor 2                   | D1Ert471e     | 2.10 | 0.24 | A_51_P452533 | BC035277  |  |
| four and a half LIM domains 1                                                | Camk2n2       | 2.10 | 0.40 | A_51_P355151 | AK013788  |  |
| RIKEN cDNA 5730410E15 gene                                                   | Fhl1          | 2.10 | 0.92 | A_51_P335000 | NM_010211 |  |
| fascin homolog 1, actin bundling protein (Strongylocentrotus purpuratus)     | 5730410E15    | 2.10 | 0.28 | A_52_P424308 | NM_178765 |  |
| vesicle amine transport protein 1 homolog (T. californica)                   | Rik           | 2.09 | 0.28 | A_51_P366061 | NM_007984 |  |
| RIKEN cDNA 1200009I06 gene                                                   | Fscn1         | 2.09 | 0.28 | A_52_P79639  | NM_012037 |  |
| dynein cytoplasmic 2 light intermediate chain 1                              | Vat1120009I06 | 2.09 | 0.30 | A_51_P204486 | NM_028807 |  |
| surfactant associated protein A1                                             | Rik           | 2.09 | 0.18 | A_51_P472481 | NM_172256 |  |
| mannoside acetylglucosaminyltransferase 4, isoenzyme B                       | Dync2l1i1     | 2.09 | 0.28 | A_52_P24439  | NM_023134 |  |
|                                                                              | Sftpa1        | 2.08 | 0.24 | A_51_P268033 | BC026638  |  |

|                                                                                  |          |      |      |              |           |
|----------------------------------------------------------------------------------|----------|------|------|--------------|-----------|
| phosphoprotein enriched in astrocytes 15A                                        | Pea15    | 2.08 | 0.92 | A_51_P495540 | NM_011063 |
| cytoskeleton-associated protein 4                                                | Ckap4    | 2.08 | 0.30 | A_52_P32121  | NM_175451 |
| forkhead box M1; RIKEN cDNA 4933413G19 gene                                      | Foxm1    | 2.08 | 0.28 | A_52_P28806  | NM_008021 |
| ATPase, H <sup>+</sup> transporting, lysosomal V0 subunit E2                     | Atp6v0e2 | 2.08 | 0.28 | A_51_P212030 | NM_133764 |
| splA/ryanodine receptor domain and SOCS box containing 4                         | Spsb4    | 2.08 | 0.00 | A_52_P659312 | NM_145134 |
| transmembrane channel-like gene family 8                                         | Tmc8     | 2.08 | 0.67 | A_52_P205854 | NM_181856 |
| monoamine oxidase A                                                              | Maoa     | 2.08 | 0.00 | A_51_P125355 | NM_173740 |
| CAAX box 1 homolog A (human); CAAX box 1 homolog B (human); similar to mammalian |          |      |      |              |           |
| retrotransposon derived 8b                                                       | Cxx1b    | 2.07 | 0.18 | A_51_P293665 | AK003646  |
| sperm autoantigenic protein 17                                                   | Spa17    | 2.06 | 0.28 | A_51_P504065 | NM_011449 |
| glucuronidase, beta                                                              | Gusb     | 2.06 | 0.00 | A_51_P211491 | NM_010368 |
| chemokine (C-X-C motif) ligand 14                                                | Cxc14    | 2.06 | 0.92 | A_51_P209183 | NM_019568 |
| zinc finger protein 385A                                                         | Zfp385   | 2.06 | 0.44 | A_51_P152032 | NM_013866 |
| DEAD/H (Asp-Glu-Ala-Asp/His) box polypeptide 26B                                 | 05F04Rik | 2.06 | 0.18 | A_51_P280043 | BC051161  |
| moesin                                                                           | Msn      | 2.06 | 0.80 | A_52_P558411 | NM_010833 |
| filamin binding LIM protein 1                                                    | Fblim1   | 2.06 | 0.28 | A_52_P342443 | NM_133754 |
| RasGEF domain family, member 1B; hypothetical protein LOC100044232               | Rasgef1b | 2.06 | 0.55 | A_52_P188827 | NM_181318 |
| aldo-keto reductase family 1, member B3 (aldose reductase)                       | Akr1b3   | 2.06 | 0.28 | A_52_P346706 | NM_009658 |
| EGF-like domain 7                                                                | Egfl7    | 2.05 | 0.28 | A_52_P15122  | NM_178444 |
| zinc finger, CCHC domain containing 3                                            | Zcchc3   | 2.05 | 0.28 | A_51_P479132 | NM_175126 |
|                                                                                  | Tmem159  | 2.05 | 0.00 | A_51_P435348 | NM_145586 |
| transmembrane protein 159                                                        |          |      |      |              |           |
| neutrophil cytosolic factor 2; neutrophil cytosolic factor 2 related sequence    | Ncf2     | 2.04 | 0.55 | A_51_P402909 | NM_010877 |
|                                                                                  | 57305    |      |      |              |           |
| RIKEN cDNA 5730528L13 gene                                                       | 28L13Rik | 2.04 | 0.00 | A_52_P400584 | NM_028137 |
| solute carrier family 39 (metal ion transporter), member 6                       | Slc39a6  | 2.04 | 0.92 | A_51_P259214 | NM_139143 |

|                                                                                                                                                                                                                                                             |           |      |      |              |              |
|-------------------------------------------------------------------------------------------------------------------------------------------------------------------------------------------------------------------------------------------------------------|-----------|------|------|--------------|--------------|
| microtubule-associated protein, RP/EB family, member 2                                                                                                                                                                                                      | Mapre2    | 2.04 | 0.40 | A_51_P438149 | NM_153058    |
|                                                                                                                                                                                                                                                             | Dnmt3     |      |      |              |              |
| DNA methyltransferase 3A                                                                                                                                                                                                                                    | a         | 2.03 | 0.28 | A_52_P169048 | NM_007872    |
| carbonic anhydrase 2                                                                                                                                                                                                                                        | Car2      | 2.03 | 0.67 | A_51_P455647 | NM_009801    |
| transmembrane 6 superfamily member 1                                                                                                                                                                                                                        | Tm6sf1    | 2.03 | 0.92 | A_51_P401683 | NM_145375    |
| amyotrophic lateral sclerosis 2 (juvenile) chromosome region, candidate 4                                                                                                                                                                                   | Als2cr4   | 2.03 | 0.40 | A_51_P243168 | NM_001037812 |
| cytidine 5'-triphosphate synthase 2                                                                                                                                                                                                                         | Ctps2     | 2.03 | 0.30 | A_51_P485542 | NM_018737    |
| schlafen 2                                                                                                                                                                                                                                                  | Slfn2     | 2.02 | 0.92 | A_51_P423578 | NM_011408    |
| thrombospondin, type I, domain 1                                                                                                                                                                                                                            | Thsd1     | 2.02 | 0.28 | A_51_P427516 | NM_019576    |
| nurim (nuclear envelope membrane protein)                                                                                                                                                                                                                   | Nrm       | 2.02 | 0.28 | A_51_P379775 | NM_134122    |
| desmoglein 1 gamma                                                                                                                                                                                                                                          | Dsg1c     | 2.02 | 0.28 | A_52_P102432 | AK034104     |
| cysteine and glycine-rich protein 1                                                                                                                                                                                                                         | Csrp1     | 2.02 | 0.80 | A_52_P209184 | NM_007791    |
| lecithin-retinol acyltransferase (phosphatidylcholine-retinol-O-acyltransferase)                                                                                                                                                                            | Lrat22100 | 2.01 | 0.28 | A_52_P669005 | NM_023624    |
| tectonin beta-propeller repeat containing 1                                                                                                                                                                                                                 | 10N04Rik  | 2.01 | 0.18 | A_51_P240693 | BC046968     |
| similar to Ena-VASP-like; Ena-vasodilator stimulated phosphoprotein                                                                                                                                                                                         | EvlBC048  | 2.01 | 0.80 | A_51_P433467 | NM_007965    |
| cDNA sequence BC048507                                                                                                                                                                                                                                      | 507       | 2.00 | 0.28 | A_51_P289160 | BC048507     |
| glycosyltransferase-like domain containing 1                                                                                                                                                                                                                | Gtdc1     | 2.00 | 0.80 | A_52_P559877 | NM_172662    |
| ADP-ribosylarginine hydrolase                                                                                                                                                                                                                               | Adprh     | 2.00 | 0.92 | A_52_P504478 | NM_007414    |
| E2F transcription factor 2                                                                                                                                                                                                                                  | E2f2E1300 | 2.00 | 0.18 | A_51_P368009 | NM_177733    |
| RIKEN cDNA E130016E03 gene                                                                                                                                                                                                                                  | 16E03Rik  | 2.00 | 0.40 | A_52_P502771 | NM_001039556 |
| histone cluster 1, H4k; histone cluster 1, H4m; histone cluster 4, H4; similar to germinal histone H4 gene; histone cluster 1, H4h; histone cluster 1, H4j; histone cluster 1, H4i; histone cluster 1, H4d; histone cluster 1, H4c; histone cluster 1, H4f; | Hist4h4   | 2.00 | 0.67 | A_52_P299703 | NM_175652    |



|                                                                                                       |        |      |      |              |           |  |
|-------------------------------------------------------------------------------------------------------|--------|------|------|--------------|-----------|--|
| histone cluster 1, H4b;<br>histone cluster 1, H4a;<br>histone cluster 2, H4; similar<br>to histone H4 | Hist1h |      |      |              |           |  |
| histone cluster 1, H2ak                                                                               | 2ak    | 2.00 | 0.28 | A_52_P498208 | NM_178183 |  |
| early growth response 2                                                                               | Egr2   | 1.99 | 0.28 | A_51_P173043 | NM_010118 |  |
| FYVE, RhoGEF and PH<br>domain containing 1                                                            | Fgd1   | 1.99 | 0.30 | A_52_P428521 | NM_008001 |  |
| H2A histone family, member<br>X                                                                       | H2afx  | 1.99 | 0.18 | A_51_P245275 | NM_010436 |  |
| phosphodiesterase 4B, cAMP<br>specific                                                                | Pde4b  | 1.99 | 0.28 | A_51_P512340 | NM_019840 |  |
| heme binding protein 2                                                                                | Hebp2  | 1.99 | 0.28 | A_51_P159612 | NM_019487 |  |
| stabilin 1                                                                                            | Stab1  | 1.99 | 0.44 | A_51_P232371 | NM_138672 |  |
| similar to nuclear myosin I<br>beta; myosin IC                                                        | Myo1c  | 1.98 | 0.28 | A_52_P241519 | NM_008659 |  |
| polymerase (DNA directed),<br>delta 1, catalytic subunit                                              | Pold1  | 1.98 | 0.28 | A_51_P367125 | NM_011131 |  |
|                                                                                                       | 91300  |      |      |              |           |  |
|                                                                                                       | 17C17  |      |      |              |           |  |
| sorting nexin 20                                                                                      | Rik    | 1.98 | 0.55 | A_51_P309158 | NM_027840 |  |
|                                                                                                       | 46324  |      |      |              |           |  |
| RIKEN cDNA 4632428N05<br>gene                                                                         | 28N05  |      |      |              |           |  |
|                                                                                                       | Rik    | 1.98 | 0.28 | A_51_P372992 | NM_028732 |  |
| prostate transmembrane<br>protein, androgen induced 1;<br>similar to Nedd4 WW                         | LOC6   |      |      |              |           |  |
| binding protein 4                                                                                     | 76013  | 1.98 | 0.28 | A_51_P449777 | XM_986662 |  |
| similar to WD repeat domain<br>62; WD repeat domain 62                                                | Wdr62  | 1.97 | 0.67 | A_51_P336114 | BC054747  |  |
| myosin IG                                                                                             | Myo1g  | 1.97 | 0.92 | A_51_P333253 | NM_178440 |  |
|                                                                                                       | 20103  |      |      |              |           |  |
| RIKEN cDNA 2010317E24<br>gene                                                                         | 17E24  |      |      |              |           |  |
|                                                                                                       | Rik    | 1.97 | 0.18 | A_51_P472217 | BC070477  |  |
| glycolipid transfer protein                                                                           | Gltf   | 1.97 | 0.28 | A_52_P436700 | NM_019821 |  |
| SCO-spondin                                                                                           | Sspo   | 1.97 | 0.44 | A_51_P104710 | NM_173428 |  |
| villin-like                                                                                           | Vill   | 1.96 | 0.00 | A_51_P417077 | NM_011700 |  |
| prostaglandin reductase 1                                                                             | Ltb4dh | 1.96 | 0.28 | A_51_P444437 | NM_025968 |  |
| serine carboxypeptidase 1                                                                             | Scepl  | 1.96 | 0.28 | A_51_P118417 | NM_029023 |  |
| integrin alpha M                                                                                      | Itgam  | 1.96 | 0.80 | A_52_P669155 | AK170324  |  |
| trafficking protein particle<br>complex 6A                                                            | Trappc |      |      |              |           |  |
|                                                                                                       | 6a     | 1.96 | 0.44 | A_51_P485683 | NM_025960 |  |
| meteorin, glial cell<br>differentiation regulator-like                                                | Metrn1 | 1.96 | 0.67 | A_52_P355084 | NM_144797 |  |
| similar to growth arrest-<br>specific 2 like 3; growth<br>arrest-specific 2 like 3                    | Gas2l3 | 1.96 | 0.28 | A_52_P335354 | AK018456  |  |
| chromatin assembly factor 1,<br>subunit A (p150)                                                      | Chaf1a | 1.95 | 0.28 | A_51_P196973 | NM_013733 |  |

|                                 |        |      |      |              |             |
|---------------------------------|--------|------|------|--------------|-------------|
| basal cell adhesion molecule    | Bcam   | 1.95 | 0.80 | A_51_P173601 | NM_020486   |
| immediate early response 5      | Ier5   | 1.95 | 0.28 | A_51_P456941 | NM_010500   |
| transgelin                      | Tagln  | 1.95 | 0.80 | A_52_P517683 | NM_011526   |
| legumain                        | Lgmn   | 1.95 | 0.92 | A_51_P110576 | NM_011175   |
|                                 | BC020  |      |      |              |             |
| cDNA sequence BC020535          | 535    | 1.95 | 0.30 | A_51_P520802 | NM_145536   |
| discoidin, CUB and LCCL         |        |      |      |              |             |
| domain containing 1             | Dcbld1 | 1.94 | 0.55 | A_52_P158710 | BC026771    |
| sodium channel, voltage-        |        |      |      |              | NM_00101476 |
| gated, type II, beta            | Scn2b  | 1.94 | 0.44 | A_51_P212741 | 1           |
|                                 | Adora  |      |      |              | NM_00100853 |
|                                 | 1      | 1.94 | 0.92 | A_52_P661412 | 3           |
| adenosine A1 receptor           |        |      |      |              |             |
| synaptonemal complex            |        |      |      |              |             |
| central element protein 2       | Syce2  | 1.94 | 0.28 | A_51_P273538 | NM_027954   |
| lysosomal-associated protein    | Laptm  |      |      |              |             |
| transmembrane 5                 | 5      | 1.93 | 0.92 | A_51_P401668 | NM_010686   |
| tweety homolog 3                |        |      |      |              |             |
| (Drosophila)                    | Ttyh3  | 1.93 | 0.28 | A_52_P196105 | NM_175274   |
| collagen, type IV, alpha 5      | Col4a5 | 1.93 | 0.30 | A_51_P216005 | NM_007736   |
| ribonucleotide reductase M1     | Rrm1   | 1.93 | 0.40 | A_51_P502082 | NM_009103   |
| family with sequence            | BC030  |      |      |              |             |
| similarity 167, member B        | 183    | 1.93 | 0.92 | A_52_P326657 | NM_182783   |
| parvin, gamma                   | Parvg  | 1.92 | 0.67 | A_52_P531651 | NM_022321   |
| melanoma antigen, family H,     | Mageh  |      |      |              |             |
| 1                               | 1      | 1.92 | 0.28 | A_51_P497692 | NM_023788   |
| immunoglobulin                  |        |      |      |              |             |
| superfamily, member 8           | Igsf8  | 1.92 | 0.00 | A_51_P442788 | NM_080419   |
| olfactomedin-like 3             | Olfml3 | 1.92 | 0.28 | A_51_P191782 | NM_133859   |
| myosin, heavy polypeptide 9,    |        |      |      |              |             |
| non-muscle                      | Myh9   | 1.92 | 0.28 | A_51_P313711 | NM_022410   |
|                                 | G4300  |      |      |              |             |
| EH domain binding protein       | 02G23  |      |      |              |             |
| 1-like 1                        | Rik    | 1.92 | 0.28 | A_51_P222475 | NM_053252   |
| methionine sulfoxide            |        |      |      |              |             |
| reductase B2                    | MsrB2  | 1.92 | 0.55 | A_51_P464911 | NM_029619   |
| SFFV proviral integration 1     | Sfpi1  | 1.92 | 0.55 | A_52_P498086 | NM_011355   |
| proline/serine-rich coiled-coil |        |      |      |              |             |
| 1                               | Psrc1  | 1.92 | 0.24 | A_52_P493112 | NM_019976   |
| transcriptional adaptor 2       |        |      |      |              |             |
| (ADA2 homolog, yeast)-like      | Tada2l | 1.92 | 0.92 | A_51_P371522 | NM_172562   |
| aldehyde dehydrogenase 3        | Aldh3  |      |      |              |             |
| family, member B1               | b1     | 1.91 | 0.92 | A_51_P506356 | NM_026316   |
| cytochrome c oxidase,           | Cox7a  |      |      |              |             |
| subunit VIIa 2                  | 2      | 1.91 | 0.92 | A_52_P37894  | NM_009945   |
| collagen, type VIII, alpha 1    | Col8a1 | 1.91 | 0.28 | A_52_P282058 | NM_007739   |
| actin related protein 2/3       | Arcp1  |      |      |              |             |
| complex, subunit 1B             | b      | 1.91 | 0.28 | A_51_P331279 | NM_023142   |
|                                 | 37324  |      |      |              |             |
|                                 | 13I11  |      |      |              |             |
| ring finger protein 145         | Rik    | 1.91 | 0.00 | A_51_P331870 | NM_028862   |

|                                                                                                          |                       |      |      |              |                  |
|----------------------------------------------------------------------------------------------------------|-----------------------|------|------|--------------|------------------|
| transferrin receptor                                                                                     | Tfrc                  | 1.91 | 0.80 | A_52_P228236 | NM_011638        |
| complement component 5a<br>receptor 1                                                                    | C5ar1                 | 1.90 | 0.67 | A_51_P279542 | NM_007577        |
| MANSC domain containing<br>1                                                                             | Mansc<br>1            | 1.90 | 0.40 | A_51_P274124 | NM_026345        |
| CD19 antigen                                                                                             | Cd19                  | 1.90 | 0.40 | A_51_P318966 | NM_009844        |
| sushi, von Willebrand factor<br>type A, EGF and pentraxin<br>domain containing 1                         | Svep1                 | 1.90 | 0.28 | A_52_P319326 | NM_022814        |
| cystatin B                                                                                               | Cstb                  | 1.90 | 0.44 | A_51_P114910 | NM_007793        |
| interferon gamma receptor 1<br>tyrosine kinase with<br>immunoglobulin-like and<br>EGF-like domains 1     | Ifngr1                | 1.90 | 0.30 | A_51_P391445 | NM_010511        |
|                                                                                                          | Tie1                  | 1.90 | 0.28 | A_51_P177171 | NM_011587        |
| family with sequence<br>similarity 65, member C                                                          | 23100<br>33K02<br>Rik | 1.90 | 0.30 | A_51_P171180 | AK009597         |
| LAG1 homolog, ceramide<br>synthase 6                                                                     | Lass6                 | 1.90 | 0.28 | A_52_P323111 | AK136463         |
| similar to melanoma antigen<br>family D, 2; melanoma<br>antigen, family D, 2                             | Maged<br>2            | 1.90 | 0.55 | A_51_P121635 | NM_030700        |
| myotubularin related protein<br>11                                                                       | Mtmr1<br>1<br>LOC2    | 1.89 | 0.00 | A_52_P350537 | NM_181409        |
| predicted gene 5076                                                                                      | 80121                 | 1.89 | 0.44 | A_52_P151378 | XM_207492        |
| paired immunoglobulin-like<br>type 2 receptor beta 2; zinc<br>finger, CW type with PWWP<br>domain 1      | Zcwp<br>w1            | 1.89 | 0.40 | A_52_P154026 | NM_00100542<br>6 |
| echinoderm microtubule<br>associated protein like 2                                                      | Eml2                  | 1.89 | 0.00 | A_51_P428013 | AK005562         |
| zinc finger protein 385A                                                                                 | Zfp385                | 1.89 | 0.30 | A_52_P29392  | BC017644         |
| armadillo repeat containing,<br>X-linked 3; hypothetical<br>protein LOC100044266;<br>predicted gene 9299 | Armex<br>3            | 1.89 | 0.30 | A_52_P423380 | NM_027870        |
| BUD13 homolog (yeast)                                                                                    | Bud13                 | 1.89 | 0.28 | A_51_P159284 | NM_146000        |
| ecotropic viral integration<br>site 2b                                                                   | Evi2b                 | 1.89 | 0.67 | A_51_P383822 | NM_146023        |
| CAP-GLY domain<br>containing linker protein 2                                                            | Cyln2                 | 1.89 | 0.18 | A_52_P360112 | NM_009990        |
| lamin B receptor                                                                                         | Lbr                   | 1.89 | 0.55 | A_51_P201137 | NM_133815        |
| C-type lectin domain family<br>5, member a                                                               | Clec5a                | 1.88 | 0.67 | A_52_P218058 | NM_00103860<br>4 |
| tryptophan rich basic protein                                                                            | Wrb                   | 1.88 | 0.18 | A_52_P418602 | NM_207301        |
| tumor necrosis factor<br>receptor superfamily,<br>member 21                                              | Tnfrsf<br>21          | 1.88 | 0.00 | A_51_P168762 | NM_178589        |
| predicted gene 5521; similar<br>to mortality factor 4 like 2;                                            | Morf4l<br>2           | 1.88 | 0.67 | A_51_P416387 | NM_019768        |

|                                                                                                     |        |      |      |              |           |  |
|-----------------------------------------------------------------------------------------------------|--------|------|------|--------------|-----------|--|
| mortality factor 4 like 2                                                                           |        |      |      |              |           |  |
| solute carrier family 3<br>(activators of dibasic and<br>neutral amino acid transport),<br>member 2 | Slc3a2 | 1.88 | 0.28 | A_51_P472901 | NM_008577 |  |
| dedicator of cytokinesis 7                                                                          | Dock7  | 1.88 | 0.30 | A_51_P141110 | NM_026082 |  |
|                                                                                                     | Tmem   |      |      |              |           |  |
| transmembrane protein 51                                                                            | 51     | 1.88 | 0.44 | A_51_P125842 | NM_145402 |  |
| chromatin assembly factor 1,<br>subunit B (p60)                                                     | Chaf1b | 1.88 | 0.28 | A_51_P367310 | NM_028083 |  |
| hematopoietic cell specific<br>Lyn substrate 1                                                      | Hcls1  | 1.88 | 0.92 | A_51_P297679 | NM_008225 |  |
|                                                                                                     | Man2b  |      |      |              |           |  |
| mannosidase 2, alpha B2                                                                             | 2      | 1.88 | 0.28 | A_51_P311785 | NM_008550 |  |
| single immunoglobulin and<br>toll-interleukin 1 receptor<br>(TIR) domain                            | Sigirr | 1.88 | 0.44 | A_51_P145520 | NM_023059 |  |
| solute carrier family 38,<br>member 1                                                               | Slc38a |      |      |              |           |  |
| CTF18, chromosome                                                                                   | 1      | 1.88 | 0.00 | A_52_P232648 | NM_134086 |  |
| transmission fidelity factor                                                                        |        |      |      |              |           |  |
| 18 homolog ( <i>S. cerevisiae</i> )                                                                 | Chtf18 | 1.88 | 0.28 | A_51_P208680 | NM_145409 |  |
| benzodiazapine receptor<br>associated protein 1                                                     | Bzrap1 | 1.87 | 0.18 | A_51_P503993 | NM_172449 |  |
|                                                                                                     | 55304  |      |      |              |           |  |
| RIKEN cDNA 5530400B01<br>gene                                                                       | 00B01  |      |      |              |           |  |
|                                                                                                     | Rik    | 1.87 | 0.28 | A_51_P114314 | AK017419  |  |
|                                                                                                     | B9300  |      |      |              |           |  |
| RIKEN cDNA B930041F14<br>gene                                                                       | 41F14  |      |      |              |           |  |
|                                                                                                     | Rik    | 1.87 | 0.55 | A_51_P381086 | NM_178699 |  |
| protein tyrosine phosphatase,<br>receptor type, S                                                   | Ptprs  | 1.87 | 0.28 | A_51_P419726 | NM_011218 |  |
| GRAM domain containing                                                                              | Gramd  |      |      |              |           |  |
| 1B                                                                                                  | 1b     | 1.87 | 0.92 | A_51_P221008 | BC070451  |  |
| c-fos induced growth factor                                                                         | Figf   | 1.87 | 0.28 | A_51_P117739 | NM_010216 |  |
|                                                                                                     | 63305  |      |      |              |           |  |
| RIKEN cDNA 6330503K22<br>gene                                                                       | 03K22  |      |      |              |           |  |
|                                                                                                     | Rik    | 1.87 | 0.30 | A_52_P344160 | NM_182995 |  |
| leucine rich repeat containing                                                                      |        |      |      |              |           |  |
| 51                                                                                                  | Lrrc51 | 1.87 | 0.00 | A_52_P319137 | AK005758  |  |
| thymidylate synthase,<br>pseudogene                                                                 | Tyms-  |      |      |              |           |  |
| ps                                                                                                  | ps     | 1.87 | 0.55 | A_51_P351363 | M30774    |  |
| tubulointerstitial nephritis<br>antigen-like 1                                                      | Tinagl | 1.87 | 0.55 | A_52_P418489 | NM_023476 |  |
| insulin-like growth factor<br>binding protein 3                                                     | Igfbp3 | 1.86 | 0.28 | A_51_P228472 | NM_008343 |  |
|                                                                                                     | BC017  |      |      |              |           |  |
| cDNA sequence BC017612                                                                              | 612    | 1.86 | 0.40 | A_51_P437289 | NM_133214 |  |
| chloride intracellular channel                                                                      |        |      |      |              |           |  |
| 1                                                                                                   | Clic1  | 1.86 | 0.55 | A_51_P357341 | NM_033444 |  |
| Fanconi anemia,                                                                                     | Fancb  | 1.86 | 0.67 | A_52_P208613 | NM_175027 |  |

|                                                                                                                                                                                                                                                                 |                         |      |      |              |                         |
|-----------------------------------------------------------------------------------------------------------------------------------------------------------------------------------------------------------------------------------------------------------------|-------------------------|------|------|--------------|-------------------------|
| complementation group B                                                                                                                                                                                                                                         |                         |      |      |              |                         |
| ATP-binding cassette, sub-family A (ABC1), member 1                                                                                                                                                                                                             | Abca1                   | 1.86 | 0.92 | A_52_P665675 | NM_013454               |
| cytohesin 4                                                                                                                                                                                                                                                     | Pscd4                   | 1.86 | 0.80 | A_52_P271099 | NM_028195               |
| IQ motif containing GTPase activating protein 1                                                                                                                                                                                                                 | Iqgap1                  | 1.86 | 0.28 | A_52_P630828 | NM_016721               |
| selenoprotein N, 1                                                                                                                                                                                                                                              | Sepn1                   | 1.86 | 0.28 | A_51_P358152 | NM_029100               |
| tumor necrosis factor, alpha-induced protein 2                                                                                                                                                                                                                  | Tnfaip2                 | 1.86 | 0.92 | A_51_P364485 | NM_009396               |
| epithelial membrane protein 2                                                                                                                                                                                                                                   | Emp2                    | 1.86 | 0.18 | A_51_P437240 | NM_007929               |
| receptor accessory protein 4                                                                                                                                                                                                                                    | Reep4                   | 1.85 | 0.28 | A_51_P420655 | NM_180588               |
| SEC14 and spectrin domains 1; predicted gene 9165                                                                                                                                                                                                               | Sestd1                  | 1.85 | 0.28 | A_52_P408237 | AK044401<br>NM_00111338 |
| glutaminase                                                                                                                                                                                                                                                     | Gls                     | 1.85 | 0.80 | A_52_P665979 | 3                       |
| minichromosome maintenance deficient 5, cell division cycle 46 (S. cerevisiae)                                                                                                                                                                                  | Mcm5                    | 1.85 | 0.40 | A_51_P190111 | NM_008566               |
| killer cell lectin-like receptor, subfamily D, member 1                                                                                                                                                                                                         | Klrd1<br>49334<br>40J22 | 1.85 | 0.92 | A_51_P280947 | NM_010654               |
| centrosomal protein 72<br>predicted gene 13611;<br>ribosomal protein L36;<br>similar to Rpl36 protein;<br>predicted gene 9437; similar to ribosomal protein L36;<br>predicted gene 4604;<br>predicted gene 7703;<br>predicted gene 5614;<br>predicted gene 9416 | Rik<br>Rpl36            | 1.85 | 0.28 | A_51_P380587 | NM_028959               |
| vomer nasal 1 receptor, E6                                                                                                                                                                                                                                      | V1re6                   | 1.85 | 0.28 | A_51_P207028 | NM_134195               |
| caspase 2                                                                                                                                                                                                                                                       | Casp2                   | 1.85 | 0.28 | A_51_P296448 | NM_007610               |
| thymidylate synthase                                                                                                                                                                                                                                            | Tyms                    | 1.85 | 0.55 | A_51_P398366 | NM_021288               |
| olfactory receptor 469                                                                                                                                                                                                                                          | Olf469                  | 1.85 | 0.44 | A_52_P313007 | NM_146426               |
| DNA segment, Chr 2, ERATO Doi 750, expressed                                                                                                                                                                                                                    | D2Ert<br>750e           | 1.84 | 0.00 | A_52_P595663 | NM_026412               |
| inositol 1,4,5-triphosphate receptor 3                                                                                                                                                                                                                          | Itpr3                   | 1.84 | 0.28 | A_51_P104897 | NM_080553               |
| H1 histone family, member X                                                                                                                                                                                                                                     | H1fx                    | 1.84 | 0.28 | A_51_P114843 | NM_198622               |
| chromatin licensing and DNA replication factor 1                                                                                                                                                                                                                | Cdt1                    | 1.84 | 0.28 | A_51_P133612 | NM_026014               |
| mannose receptor, C type 2                                                                                                                                                                                                                                      | Mrc2                    | 1.84 | 0.28 | A_52_P424840 | AK086703                |
| transmembrane 4 superfamily member 1                                                                                                                                                                                                                            | Tm4sf1                  | 1.84 | 0.24 | A_51_P240614 | NM_008536               |

|                                                                                                                                                                        |          |      |      |              |           |
|------------------------------------------------------------------------------------------------------------------------------------------------------------------------|----------|------|------|--------------|-----------|
| G protein-coupled receptor, family C, group 5, member B                                                                                                                | Gprc5    |      |      |              |           |
| lamin B1                                                                                                                                                               | b        | 1.84 | 0.28 | A_51_P173709 | NM_022420 |
| corin                                                                                                                                                                  | Lmnb1    | 1.84 | 0.28 | A_51_P120717 | NM_010721 |
| polymerase (DNA directed), epsilon                                                                                                                                     | Corin    | 1.84 | 0.67 | A_51_P135268 | NM_016869 |
|                                                                                                                                                                        | Pole     | 1.84 | 0.92 | A_51_P155482 | NM_011132 |
|                                                                                                                                                                        | 31100    |      |      |              |           |
| predicted gene 6314; RIKEN cDNA 3110003A17 gene similar to SH3-domain binding protein 1; SH3-domain binding protein 1; similar to SH3 domain-binding protein 1 (3BP-1) | 03A17    |      |      |              |           |
| serine (or cysteine) peptidase inhibitor, clade H, member 1                                                                                                            | Rik      | 1.83 | 0.92 | A_52_P238873 | BC098509  |
| phosphatidylinositol transfer protein, alpha                                                                                                                           | Sh3bp1   | 1.83 | 0.30 | A_51_P342906 | NM_009164 |
| junction adhesion molecule 2                                                                                                                                           | Serpinh1 | 1.83 | 0.40 | A_51_P287069 | NM_009825 |
| ATPase family, AAA domain containing 2                                                                                                                                 | Pitpna   | 1.83 | 0.28 | A_51_P466371 | NM_008850 |
| similar to ADP-ribosylation factor-like protein 7; ADP-ribosylation factor-like 4C                                                                                     | Jam2     | 1.83 | 0.80 | A_51_P418375 | NM_023844 |
| tubulin, beta 4                                                                                                                                                        | Atad2    | 1.83 | 0.92 | A_52_P624168 | NM_027435 |
| nei like 3 (E. coli)                                                                                                                                                   | Arl4c    | 1.83 | 0.67 | A_51_P289796 | NM_177305 |
| DEAD/H (Asp-Glu-Ala-Asp/His) box polypeptide 26B                                                                                                                       | Tubb4    | 1.83 | 0.28 | A_51_P315795 | NM_009451 |
| polo-like kinase 2 (Drosophila)                                                                                                                                        | Neil3    | 1.83 | 0.28 | A_52_P251366 | NM_146208 |
| sema domain, seven thrombospondin repeats (type 1 and type 1-like), transmembrane domain (TM) and short cytoplasmic domain, (semaphorin) 5A                            | 63305    |      |      |              |           |
| RAB31, member RAS oncogene family                                                                                                                                      | 05F04    |      |      |              |           |
|                                                                                                                                                                        | Rik      | 1.83 | 0.80 | A_51_P337662 | NM_172779 |
|                                                                                                                                                                        | Plk2     | 1.83 | 0.80 | A_51_P290576 | NM_152804 |
| oligosaccharyltransferase complex subunit                                                                                                                              | Sema5a   | 1.82 | 0.92 | A_52_P409076 | NM_009154 |
| midkine                                                                                                                                                                | Rab31    | 1.82 | 0.67 | A_51_P209280 | NM_133685 |
| inhibitor of DNA binding 3                                                                                                                                             | 23100    |      |      |              |           |
| interleukin 7 receptor                                                                                                                                                 | 08M10    |      |      |              |           |
| claudin 7                                                                                                                                                              | Rik      | 1.82 | 0.30 | A_52_P592951 | NM_025509 |
|                                                                                                                                                                        | Mdk      | 1.82 | 0.24 | A_51_P225665 | NM_010784 |
|                                                                                                                                                                        | Id3      | 1.82 | 0.18 | A_51_P380178 | NM_008321 |
|                                                                                                                                                                        | Il7r     | 1.82 | 0.92 | A_51_P196695 | NM_008372 |
|                                                                                                                                                                        | Cldn7    | 1.81 | 0.28 | A_51_P165185 | NM_016887 |
|                                                                                                                                                                        | 48334    |      |      |              |           |
| GINS complex subunit 2 (Psf2 homolog)                                                                                                                                  | 27B12    |      |      |              |           |
| Rho GDP dissociation                                                                                                                                                   | Rik      | 1.81 | 0.00 | A_52_P381303 | BC082565  |
|                                                                                                                                                                        | Arhgd1   | 1.81 | 0.30 | A_52_P419405 | NM_133796 |

|                                                                                     |                |      |      |              |                          |
|-------------------------------------------------------------------------------------|----------------|------|------|--------------|--------------------------|
| inhibitor (GDI) alpha                                                               | a              |      |      |              |                          |
| asparaginase like 1                                                                 | Asrgl1         | 1.81 | 0.28 | A_52_P555262 | NM_025610                |
| solute carrier family 37<br>(glycerol-3-phosphate<br>transporter), member 2         | Slc37a<br>2    | 1.81 | 0.55 | A_51_P259774 | NM_020258                |
| solute carrier family 22<br>(organic cation transporter),<br>member 13              | Slc22a<br>13   | 1.81 | 0.80 | A_51_P154953 | NM_133980                |
| minichromosome<br>maintenance deficient 7 ( <i>S.</i><br><i>cerevisiae</i> )        | Mcm7           | 1.81 | 0.92 | A_51_P165704 | NM_008568                |
| adenosine monophosphate<br>deaminase 2 (isoform L)                                  | Ampd<br>2      | 1.81 | 0.00 | A_51_P479769 | NM_028779                |
| myosin, light polypeptide<br>kinase 2, skeletal muscle                              | Mylk2          | 1.80 | 0.92 | A_52_P60074  | AK079396                 |
| phospholipid scramblase 3;<br>similar to phospholipid<br>scramblase 3               | Plscr3         | 1.80 | 0.00 | A_51_P302458 | NM_023564<br>NM_00104043 |
| transforming, acidic coiled-<br>coil containing protein 3                           | Tacc3          | 1.80 | 0.00 | A_51_P220222 | 5                        |
| zinc finger protein 414                                                             | Zfp414         | 1.80 | 0.18 | A_51_P503543 | NM_026712                |
| pleckstrin homology domain<br>containing, family G (with<br>RhoGef domain) member 2 | Plekhg<br>2    | 1.80 | 0.80 | A_51_P178022 | NM_138752                |
| deltex 3 homolog<br>( <i>Drosophila</i> )                                           | Dtx3           | 1.79 | 0.55 | A_51_P249009 | NM_030714                |
| immunoglobulin joining<br>chain                                                     | Igj            | 1.79 | 0.55 | A_51_P150705 | NM_152839                |
| nuclear receptor coactivator 7                                                      | Ncoa7          | 1.79 | 0.40 | A_52_P669471 | NM_172495                |
| six transmembrane epithelial<br>antigen of prostate 2                               | Steap2         | 1.78 | 0.44 | A_52_P129456 | AK086787                 |
| centrin 4; predicted gene<br>7094                                                   | Cetn4<br>BC048 | 1.78 | 0.55 | A_51_P108990 | NM_145825<br>NM_00100117 |
| cDNA sequence BC048546                                                              | 546            | 1.78 | 0.92 | A_52_P173945 | 9                        |
| flap structure specific<br>endonuclease 1                                           | Fen1           | 1.78 | 0.28 | A_52_P502684 | NM_007999                |
| phosphatidic acid<br>phosphatase type 2A                                            | Ppap2a         | 1.78 | 0.92 | A_51_P189104 | NM_008903<br>NM_00100188 |
| myelin protein zero-like 1                                                          | Mpzl1          | 1.78 | 0.44 | A_51_P228295 | 0                        |
| EH-domain containing 4                                                              | Ehd4           | 1.78 | 0.28 | A_51_P455807 | NM_133838                |
| melatonin receptor 1A                                                               | Mtnr1a         | 1.78 | 0.67 | A_52_P73986  | NM_008639                |
| chemokine (C-C motif)<br>ligand 24                                                  | Ccl24          | 1.78 | 0.28 | A_51_P322640 | NM_019577                |
| MAP kinase-interacting<br>serine/threonine kinase 2                                 | Mknk2          | 1.78 | 0.44 | A_52_P376135 | NM_021462                |
| RIKEN cDNA 2010109K11 gene                                                          |                | 1.77 | 0.30 | A_52_P598835 | BC061478                 |
|                                                                                     | 26100          |      |      |              |                          |
| apoptosis-inducing, TAF9-<br>like domain 1                                          | 40C18<br>Rik   | 1.77 | 0.00 | A_51_P270519 | NM_027263                |

|                                                                                                                                                                           |                       |      |      |              |                          |
|---------------------------------------------------------------------------------------------------------------------------------------------------------------------------|-----------------------|------|------|--------------|--------------------------|
| megakaryocyte-associated tyrosine kinase                                                                                                                                  | Matk<br>C3300         | 1.77 | 0.30 | A_51_P399896 | NM_010768                |
| RIKEN cDNA C330027C09 gene                                                                                                                                                | 27C09<br>Rik          | 1.77 | 0.28 | A_51_P499233 | NM_172616                |
| protein phosphatase 1, regulatory (inhibitor) subunit 13B                                                                                                                 | Ppp1r1<br>3b          | 1.77 | 0.28 | A_51_P130409 | NM_011625                |
| PQ loop repeat containing                                                                                                                                                 | Pqlc3<br>23100        | 1.77 | 0.67 | A_51_P332652 | NM_172574                |
| RIKEN cDNA 2310022A10 gene                                                                                                                                                | 22A10<br>Rik          | 1.77 | 0.00 | A_51_P507172 | NM_175107                |
| predicted gene 9103; predicted gene 8503; similar to protein phosphatase 1, regulatory (inhibitor) subunit 14B; protein phosphatase 1, regulatory (inhibitor) subunit 14B | Ppp1r1<br>4b          | 1.77 | 0.24 | A_51_P133037 | NM_008889                |
| numb-like                                                                                                                                                                 | Numb1                 | 1.77 | 0.28 | A_51_P158355 | U96441                   |
| G two S phase expressed protein 1                                                                                                                                         | Gtse1<br>49305        | 1.77 | 0.28 | A_51_P195153 | NM_013882                |
| RIKEN cDNA 4930546H06 gene                                                                                                                                                | 46H06<br>Rik          | 1.76 | 0.67 | A_52_P357962 | NM_029205                |
| CD300A antigen                                                                                                                                                            | Cd300<br>a            | 1.76 | 0.80 | A_52_P492142 | NM_170758                |
| RIKEN cDNA 4932415G12 gene                                                                                                                                                | 49324<br>15G12<br>Rik | 1.76 | 0.40 | A_51_P152479 | BC067070                 |
| predicted gene 4066; smoothened homolog (Drosophila)                                                                                                                      | Smo<br>31100          | 1.76 | 0.67 | A_51_P258766 | NM_176996                |
| family with sequence similarity 164, member A                                                                                                                             | 50N22<br>Rik          | 1.76 | 0.28 | A_52_P361993 | NM_173181                |
|                                                                                                                                                                           | E1302<br>01N16        |      |      |              |                          |
| proline rich 15                                                                                                                                                           | Rik                   | 1.76 | 0.92 | A_51_P508959 | NM_030024                |
| EPS8-like 1                                                                                                                                                               | Eps8l1                | 1.76 | 0.67 | A_52_P37757  | NM_026146<br>NM_00107655 |
| spectrin alpha 2                                                                                                                                                          | Spna2                 | 1.75 | 0.28 | A_51_P125866 | 4                        |
| predicted gene 11575; predicted gene 10177; predicted gene 4184; SEC61, gamma subunit; similar to Sec61-complex gamma-subunit                                             | Sec61g                | 1.75 | 0.92 | A_51_P204390 | NM_011343                |
| angiomin                                                                                                                                                                  | Amot<br>Cd164l        | 1.75 | 0.28 | A_51_P321385 | AK129277                 |
| CD164 sialomucin-like 2                                                                                                                                                   | 2                     | 1.75 | 0.30 | A_51_P354757 | AK139809                 |



|                                |        |      |      |               |             |
|--------------------------------|--------|------|------|---------------|-------------|
| predicted gene 1060            | Gm10   |      |      |               | NM_00103346 |
| solute carrier family 44,      | 60     | 1.75 | 0.28 | A_52_P481279  | 0           |
| member 2                       | Slc44a |      |      |               |             |
| regulator of G-protein         | 2      | 1.75 | 0.55 | A_51_P140331  | NM_152808   |
| signalling 10                  | Rgs10  | 1.75 | 0.92 | A_51_P218774  | NM_026418   |
| CTTNBP2 N-terminal like        | Ctnbpb |      |      |               |             |
|                                | 2nl    | 1.75 | 0.28 | A_51_P511102  | NM_030249   |
| RIKEN cDNA 2010204K13          | 20102  |      |      |               |             |
| gene                           | 04K13  |      |      |               |             |
| grancalcin                     | Rik    | 1.75 | 0.28 | A_52_P155805  | AK008437    |
| RAB27A, member RAS             | Gca    | 1.74 | 0.28 | A_52_P287456  | NM_145523   |
| oncogene family                | Rab27  |      |      |               |             |
| expressed sequence             | a      | 1.74 | 0.28 | A_52_P426740  | NM_023635   |
| AU040320                       | AU040  |      |      |               |             |
| pleckstrin homology-like       | 320    | 1.74 | 0.28 | A_51_P276599  | NM_133886   |
| domain, family B, member 1     | Phldb1 | 1.74 | 0.55 | A_51_P395546  | NM_153537   |
| kinase 4                       | Adck4  | 1.74 | 0.40 | A_51_P197209  | NM_133770   |
| interleukin 1 alpha            | Il1a   | 1.74 | 0.92 | A_52_P100926  | NM_010554   |
| similar to Small nuclear       |        |      |      |               |             |
| ribonucleoprotein F (snRNP-    |        |      |      |               |             |
| F) (Sm protein F) (Sm-F)       |        |      |      |               |             |
| (SmF); small nuclear           |        |      |      |               |             |
| ribonucleoprotein              |        |      |      |               |             |
| polypeptide F; predicted gene  |        |      |      |               |             |
| 13092                          | Snrpf  | 1.74 | 0.24 | A_51_P255613  | BC100499    |
| centromere protein N           | 26105  |      |      |               |             |
| serine (or cysteine) peptidase | 10J17  |      |      |               |             |
| inhibitor, clade B, member 8   | Rik    | 1.74 | 0.28 | A_52_P304947  | NM_028131   |
| RAP2B, member of RAS           | Serpin |      |      |               |             |
| oncogene family                | b8     | 1.74 | 0.44 | A_52_P521054  | NM_011459   |
| bone morphogenetic protein     | Rap2b  | 1.74 | 0.24 | A_51_P213761  | NM_028712   |
| 7                              | Bmp7   | 1.74 | 0.28 | A_51_P492366  | NM_007557   |
| solute carrier family 16       |        |      |      |               |             |
| (monocarboxylic acid           | Slc16a |      |      |               |             |
| transporters), member 1        | 1      | 1.74 | 0.80 | A_51_P397363  | NM_009196   |
| tumor necrosis factor          |        |      |      |               |             |
| receptor superfamily,          | Tnfrsf |      |      |               |             |
| member 11a                     | 11a    | 1.74 | 0.67 | A_52_P1068320 | NM_009399   |
| potassium channel              |        |      |      |               |             |
| tetramerisation domain         |        |      |      |               |             |
| containing 12                  | Kctd12 | 1.74 | 0.18 | A_51_P371912  | NM_177715   |
| myosin IXb                     | Myo9b  | 1.73 | 0.67 | A_51_P399985  | NM_015742   |
| RIKEN cDNA 2310051F07          | 23100  |      |      |               |             |
| gene                           | 51F07  |      |      |               |             |
| immunoglobulin heavy           | Rik    | 1.73 | 0.44 | A_51_P166107  | AK075904    |
|                                | Ighg1  | 1.73 | 0.92 | A_52_P1054013 | BC003435    |

|                                                                          |        |      |      |              |           |
|--------------------------------------------------------------------------|--------|------|------|--------------|-----------|
| constant gamma 1 (G1m marker)                                            |        |      |      |              |           |
| IQ motif containing E                                                    | Iqce   | 1.73 | 0.55 | A_52_P465828 | NM_028833 |
|                                                                          | Mtac2  |      |      |              |           |
| tandem C2 domains, nuclear SRY-box containing gene 19;                   | d1     | 1.73 | 0.55 | A_52_P448749 | AK053942  |
| SRY-box containing gene 4                                                | Sox4   | 1.73 | 0.28 | A_51_P105178 | NM_009238 |
| GPI-anchored HDL-binding protein 1                                       | Gpihb  |      |      |              |           |
|                                                                          | p1     | 1.73 | 0.40 | A_51_P331328 | NM_026730 |
| adenine phosphoribosyl transferase                                       | Aprt   | 1.73 | 0.28 | A_52_P594768 | NM_009698 |
| ADP-ribosylation factor-like 2 binding protein                           | Arl2bp | 1.73 | 0.28 | A_52_P153189 | NM_024269 |
|                                                                          | 06100  |      |      |              |           |
| RIKEN cDNA 0610010012 gene                                               | 10O12  |      |      |              |           |
|                                                                          | Rik    | 1.73 | 0.92 | A_52_P227937 | BC028765  |
|                                                                          | Cdc42  |      |      |              |           |
| CDC42 small effector 1                                                   | se1    | 1.73 | 0.28 | A_51_P512591 | NM_172395 |
| aurora kinase B                                                          | Aurkb  | 1.72 | 0.28 | A_51_P415059 | NM_011496 |
| inositol (myo)-1(or 4)-monophosphatase 2                                 | Impa2  | 1.72 | 0.40 | A_51_P299287 | NM_053261 |
| rhotekin                                                                 | Rtkn   | 1.72 | 0.13 | A_51_P234330 | NM_133641 |
| transmembrane emp24 domain containing 3                                  | Tmed3  | 1.72 | 0.18 | A_51_P284244 | NM_025360 |
| adaptor protein complex AP-1, sigma 1                                    | Ap1s1  | 1.72 | 0.24 | A_51_P166394 | NM_007457 |
| solute carrier family 16 (monocarboxylic acid transporters), member 3    | Slc16a |      |      |              |           |
|                                                                          | 3      | 1.72 | 0.67 | A_51_P144090 | NM_030696 |
|                                                                          | 23000  |      |      |              |           |
| TMF1-regulated nuclear protein 1                                         | 02D11  |      |      |              |           |
| hematological and neurological expressed sequence 1; predicted gene 3687 | Rik    | 1.72 | 0.40 | A_52_P391624 | BC049168  |
| NCK associated protein 1 like                                            | Hn1    | 1.72 | 0.18 | A_51_P247157 | NM_008258 |
|                                                                          | Nckap  |      |      |              |           |
|                                                                          | 11     | 1.72 | 0.80 | A_51_P119429 | NM_153505 |
| sorting nexin 8                                                          | Snx8   | 1.71 | 0.67 | A_52_P77245  | NM_172277 |
| beta-carotene 15,15'-monooxygenase                                       | Bcmo1  | 1.71 | 0.80 | A_51_P374137 | NM_021486 |
|                                                                          | E3300  |      |      |              |           |
| RIKEN cDNA E330016A19 gene                                               | 16A19  |      |      |              |           |
|                                                                          | Rik    | 1.71 | 0.67 | A_51_P289647 | NM_173386 |
|                                                                          | 96300  |      |      |              |           |
| ubiquitin domain containing 2                                            | 54F20  |      |      |              |           |
|                                                                          | Rik    | 1.71 | 0.92 | A_52_P284958 | NM_173784 |
| integral membrane protein 2C                                             | Itm2c  | 1.71 | 0.40 | A_51_P267370 | NM_022417 |
| predicted gene 7743; calmodulin 3; calmodulin 2;                         | Calm3  | 1.71 | 0.28 | A_52_P140356 | NM_007590 |

|                                                                                                          |                 |      |      |              |                          |
|----------------------------------------------------------------------------------------------------------|-----------------|------|------|--------------|--------------------------|
| calmodulin 1; predicted gene<br>7308                                                                     |                 |      |      |              |                          |
| nuclear factor of activated T-<br>cells, cytoplasmic,<br>calcineurin-dependent 4                         | Nfatc4          | 1.71 | 0.28 | A_52_P342159 | NM_023699                |
| myeloid/lymphoid or mixed-<br>lineage leukemia (trithorax<br>homolog, Drosophila);<br>translocated to, 3 | Mllt3<br>Otud7  | 1.71 | 0.44 | A_51_P394484 | NM_029931<br>NM_00102561 |
| OTU domain containing 7B                                                                                 | b               | 1.70 | 0.30 | A_52_P623738 | 3                        |
| napsin A aspartic peptidase<br>chemokine (C-C motif)<br>receptor 1                                       | Napsa           | 1.70 | 0.44 | A_51_P146149 | NM_008437                |
| tubulin folding cofactor E-<br>like                                                                      | Ccr1            | 1.70 | 0.67 | A_52_P616356 | NM_009912                |
|                                                                                                          | Lrrc35<br>50334 | 1.70 | 0.67 | A_52_P244723 | NM_173038                |
| RIKEN cDNA 5033421B08<br>gene                                                                            | 21B08<br>Rik    | 1.70 | 0.28 | A_52_P515620 | AK017181                 |
|                                                                                                          | 58304<br>83C08  |      |      |              |                          |
| Gen homolog 1,<br>endonuclease (Drosophila)<br>myosin, light polypeptide 9,<br>regulatory                | Rik             | 1.70 | 0.80 | A_52_P205951 | NM_177331                |
| polymerase (DNA directed),<br>mu                                                                         | Myl9            | 1.70 | 0.92 | A_51_P308298 | BC055439                 |
| paralemmin                                                                                               | Polm            | 1.70 | 0.28 | A_51_P397493 | NM_017401                |
| ferric-chelate reductase 1                                                                               | Palm            | 1.70 | 0.44 | A_52_P325444 | NM_023128                |
|                                                                                                          | Frrs1           | 1.70 | 0.18 | A_51_P440365 | NM_009146                |
|                                                                                                          | Shank           |      |      |              |                          |
| SH3/ankyrin domain gene 3                                                                                | 3               | 1.70 | 0.55 | A_51_P115626 | AJ245904                 |
| sodium channel, voltage-<br>gated, type I, beta                                                          | Scn1b           | 1.70 | 0.30 | A_52_P307394 | NM_011322                |
| cellular repressor of E1A-<br>stimulated genes 2                                                         | Creg2           | 1.70 | 0.28 | A_52_P387056 | NM_170597                |
|                                                                                                          | 27000           |      |      |              |                          |
| RIKEN cDNA 2700049P18<br>gene                                                                            | 49P18<br>Rik    | 1.70 | 0.55 | A_52_P144285 | NM_175382                |
|                                                                                                          | Hist3h          |      |      |              |                          |
| histone cluster 3, H2a                                                                                   | 2a              | 1.70 | 0.40 | A_52_P615375 | NM_178218                |
|                                                                                                          | Depdc           |      |      |              |                          |
| DEP domain containing 1B<br>MTOR associated protein,<br>LST8 homolog (S.<br>cerevisiae)                  | 1b              | 1.69 | 0.28 | A_51_P303749 | NM_178683                |
|                                                                                                          | Gbl             | 1.69 | 0.00 | A_52_P357402 | NM_019988                |
|                                                                                                          | A8300           |      |      |              |                          |
| RIKEN cDNA A830007P12<br>gene                                                                            | 07P12<br>Rik    | 1.69 | 0.67 | A_51_P410918 | NM_146115                |
| carboxypeptidase M                                                                                       | Cpm             | 1.69 | 0.55 | A_51_P304397 | BC100404                 |
|                                                                                                          | 63305           |      |      |              |                          |
| RIKEN cDNA 6330509M05<br>gene                                                                            | 09M05<br>Rik    | 1.69 | 0.18 | A_52_P923110 | AK031957                 |

|                                                                                                    |                               |      |      |              |                  |
|----------------------------------------------------------------------------------------------------|-------------------------------|------|------|--------------|------------------|
| brain expressed X-linked 2<br>unc-5 homolog B (C.<br>elegans)                                      | Bex2                          | 1.69 | 0.24 | A_51_P237668 | NM_009749        |
| meiosis-specific nuclear<br>structural protein 1                                                   | Unc5b                         | 1.69 | 0.28 | A_51_P294535 | NM_029770        |
| cytidine 5'-triphosphate<br>synthase                                                               | Mns1                          | 1.68 | 0.24 | A_51_P100174 | NM_008613        |
| nuclear factor of kappa light<br>polypeptide gene enhancer in<br>B-cells inhibitor, zeta           | Ctps                          | 1.68 | 0.92 | A_51_P251357 | NM_016748        |
| predicted gene 7270;<br>predicted gene 14680;                                                      | Nfkbiz                        | 1.68 | 0.28 | A_51_P387591 | NM_030612        |
| spermine synthase                                                                                  | Sms                           | 1.68 | 0.55 | A_51_P457259 | NM_009214        |
| deltex 4 homolog<br>(Drosophila)                                                                   | Dtx4<br>31100<br>37116        | 1.68 | 0.40 | A_52_P366666 | NM_172442        |
| defects in morphology 1<br>homolog (S. cerevisiae)                                                 | Rik                           | 1.68 | 0.28 | A_51_P197883 | NM_028457        |
| minichromosome<br>maintenance deficient 2                                                          | Mcm2                          | 1.68 | 0.44 | A_51_P158210 | NM_008564        |
| mitotin (S. cerevisiae)                                                                            | Ryr3                          | 1.68 | 0.67 | A_52_P261858 | NM_177652        |
| ryanodine receptor 3                                                                               | Lemd2                         | 1.68 | 0.40 | A_51_P251508 | BC050010         |
| LEM domain containing 2                                                                            | Dkk3                          | 1.67 | 0.28 | A_52_P220176 | NM_015814        |
| dickkopf homolog 3<br>(Xenopus laevis)                                                             | Ift80                         | 1.67 | 0.00 | A_51_P363090 | NM_026641        |
| intraflagellar transport 80<br>homolog (Chlamydomonas)                                             | Zmynd<br>12                   | 1.67 | 0.55 | A_51_P309084 | NM_00101490<br>0 |
| similar to zinc finger, MYND<br>domain containing 12; zinc<br>finger, MYND domain<br>containing 12 | Psat1                         | 1.67 | 0.00 | A_51_P317427 | NM_177420        |
| similar to Phosphoserine<br>aminotransferase 1;<br>phosphoserine<br>aminotransferase 1             | Snx26                         | 1.67 | 0.44 | A_51_P346272 | NM_178252        |
| sorting nexin 26                                                                                   | Ralb                          | 1.67 | 0.44 | A_52_P253004 | NM_022327        |
| v-ral simian leukemia viral<br>oncogene homolog B (ras<br>related)                                 | Trpm4<br>28104                | 1.67 | 0.67 | A_52_P303100 | NM_175130        |
| transient receptor potential<br>cation channel, subfamily M,<br>member 4                           | RIKEN cDNA 2810405K02<br>gene | 1.67 | 0.55 | A_51_P424878 | NM_025582        |
| G protein-coupled receptor<br>97                                                                   | Rik                           | 1.67 | 0.55 | A_51_P424878 | NM_025582        |
| Rho GTPase activating<br>protein 11A; predicted gene<br>4500; similar to DNA                       | Gpr97                         | 1.67 | 0.92 | A_51_P247694 | NM_173036        |
| directed RNA polymerase II                                                                         | Arhga<br>p11a                 | 1.67 | 0.28 | A_51_P409496 | NM_181416        |

|                                                                                                                         |                |      |      |              |                  |
|-------------------------------------------------------------------------------------------------------------------------|----------------|------|------|--------------|------------------|
| polypeptide A<br>hydroxyacylglutathione<br>hydrolase-like                                                               | Haghl          | 1.67 | 0.28 | A_51_P292073 | NM_026897        |
| similar to Tpd52 protein;<br>tumor protein D52                                                                          | Tpd52          | 1.66 | 0.80 | A_51_P506792 | NM_009412        |
| similar to creatine kinase,<br>brain; predicted gene 12892;<br>creatine kinase, brain                                   | Ckb<br>Tmem    | 1.66 | 0.67 | A_52_P385606 | NM_021273        |
| transmembrane protein 49                                                                                                | 49             | 1.66 | 0.18 | A_52_P127362 | NM_029478        |
| centromere protein H                                                                                                    | Cenph          | 1.66 | 0.28 | A_51_P492830 | NM_021886        |
| spermine oxidase                                                                                                        | Smox           | 1.66 | 0.24 | A_51_P372826 | NM_145533        |
| keratin 19                                                                                                              | Krt19<br>E3300 | 1.66 | 0.67 | A_51_P356642 | NM_008471        |
| RIKEN cDNA E330037M01<br>gene                                                                                           | 37M01<br>Rik   | 1.66 | 0.28 | A_52_P672437 | AK033305         |
| a disintegrin-like and<br>metallopeptidase (reprolysin<br>type) with thrombospondin<br>type 1 motif, 7                  | Adamt<br>s7    | 1.66 | 0.40 | A_51_P487244 | NM_00100391<br>1 |
| amidohydrolase domain<br>containing 2                                                                                   | Amdh<br>d2     | 1.66 | 0.40 | A_51_P260658 | NM_172935        |
| solute carrier family 9<br>(sodium/hydrogen<br>exchanger), member 7                                                     | Slc9a7         | 1.66 | 0.13 | A_51_P110088 | NM_177353        |
| cyclin-dependent kinase<br>inhibitor 2A                                                                                 | Cdkn2<br>a     | 1.66 | 0.92 | A_51_P144813 | NM_009877        |
| ADP-ribosylation factor-like<br>6 interacting protein 5                                                                 | Arl6ip<br>5    | 1.65 | 0.28 | A_51_P259902 | NM_022992        |
| ATPase, H <sup>+</sup> transporting,<br>lysosomal V1 subunit G1;<br>predicted gene 13453;<br>predicted gene 12344       | Atp6v<br>1g1   | 1.65 | 0.13 | A_51_P140171 | NM_024173        |
| glycerophosphodiester<br>phosphodiesterase domain<br>containing 1                                                       | Gdpd1          | 1.65 | 0.55 | A_52_P75465  | NM_025638        |
| Ellis van Creveld gene<br>homolog (human)                                                                               | Evc            | 1.65 | 0.28 | A_52_P476431 | NM_021292        |
| predicted gene,<br>ENSMUSG00000051562                                                                                   | Tmem<br>42     | 1.65 | 0.92 | A_51_P410927 | AK016980         |
| similar to platelet-derived<br>growth factor B chain;<br>platelet derived growth<br>factor, B polypeptide               | Pdgfb          | 1.65 | 0.40 | A_51_P175262 | NM_011057        |
| suppression of<br>tumorigenicity 14 (colon<br>carcinoma)                                                                | St14           | 1.65 | 0.18 | A_51_P282837 | NM_011176        |
| predicted gene 11401; similar<br>to transcription elongation<br>factor B (SIII), polypeptide<br>2; predicted gene 8971; | Tceb2          | 1.65 | 0.28 | A_51_P397823 | NM_026305        |

|                                                                                                                                                                                                                                                                                                              |          |      |      |              |           |
|--------------------------------------------------------------------------------------------------------------------------------------------------------------------------------------------------------------------------------------------------------------------------------------------------------------|----------|------|------|--------------|-----------|
| transcription elongation factor B (SIII), polypeptide 2                                                                                                                                                                                                                                                      | Tbx20    | 1.65 | 0.30 | A_52_P429876 | NM_194263 |
| T-box 20                                                                                                                                                                                                                                                                                                     |          |      |      |              |           |
| trans-acting transcription factor 5                                                                                                                                                                                                                                                                          | Sp5      | 1.65 | 0.92 | A_51_P404193 | NM_022435 |
| inhibitor of growth family, member 5                                                                                                                                                                                                                                                                         | Ing5     | 1.65 | 0.92 | A_51_P110168 | NM_025454 |
| prolylcarboxypeptidase (angiotensinase C)                                                                                                                                                                                                                                                                    | Prcp     | 1.65 | 0.30 | A_52_P99430  | NM_028243 |
| TBC1 domain family, member 10b                                                                                                                                                                                                                                                                               | Tbc1d10b | 1.65 | 0.00 | A_51_P233947 | NM_144522 |
| receptor accessory protein 1                                                                                                                                                                                                                                                                                 | Reep1    | 1.65 | 0.28 | A_51_P508341 | NM_178608 |
| Eph receptor B4                                                                                                                                                                                                                                                                                              | Ephb4    | 1.65 | 0.67 | A_52_P542612 | NM_010144 |
| mannoside acetylglucosaminyltransferase 4, isoenzyme B                                                                                                                                                                                                                                                       | Mgat4b   | 1.65 | 0.55 | A_52_P337220 | NM_145926 |
| similar to U1 small nuclear ribonucleoprotein C (U1 snRNP protein C) (U1C protein) (U1-C); predicted gene 2991; predicted gene 8849; predicted gene 8974; predicted gene 4674; U1 small nuclear ribonucleoprotein C                                                                                          | Snrp1c   | 1.64 | 0.55 | A_51_P157595 | NM_011432 |
| predicted gene 10191; predicted gene 7689; predicted gene 9401; similar to ribosomal protein L31; hypothetical protein LOC675768; predicted gene 13004; predicted gene 9228; predicted gene 10072; predicted gene 5437; predicted gene 9154; ribosomal protein L31; predicted gene 6670; predicted gene 8759 | Rpl31    | 1.64 | 0.44 | A_52_P321875 | NM_053257 |
| sperm flagellar 1                                                                                                                                                                                                                                                                                            | Spef1    | 1.64 | 0.28 | A_52_P156765 | BC006046  |
| annexin A9                                                                                                                                                                                                                                                                                                   | Anxa9    | 1.64 | 0.67 | A_51_P451482 | NM_023628 |
| interferon gamma receptor 2                                                                                                                                                                                                                                                                                  | Ifngr2   | 1.64 | 0.18 | A_52_P471395 | NM_008338 |
| small EDRK-rich factor 1                                                                                                                                                                                                                                                                                     | Serf1    | 1.64 | 0.28 | A_51_P254986 | NM_011353 |
| mitogen-activated protein kinase 3                                                                                                                                                                                                                                                                           | Mapk3    | 1.64 | 0.28 | A_51_P158628 | NM_011952 |
| centromere protein T                                                                                                                                                                                                                                                                                         | Cenpt    | 1.64 | 0.28 | A_52_P537566 | NM_177150 |
| PAS domain containing serine/threonine kinase                                                                                                                                                                                                                                                                | Pask     | 1.64 | 0.28 | A_51_P223709 | NM_080850 |
| histocompatibility 2, class II antigen A, beta 1; response to metastatic cancers 2; similar to H-2 class II                                                                                                                                                                                                  | H2-Ab1   | 1.64 | 0.55 | A_51_P215237 | NM_207105 |

|                                                                                                                     |                                |      |      |              |                  |
|---------------------------------------------------------------------------------------------------------------------|--------------------------------|------|------|--------------|------------------|
| histocompatibility antigen, A-D beta chain precursor                                                                | Csda                           | 1.63 | 0.92 | A_51_P311977 | NM_011733        |
| cold shock domain protein A predicted gene 6941; predicted gene 10131; enhancer of rudimentary homolog (Drosophila) | Erh                            | 1.63 | 0.28 | A_51_P223666 | NM_007951        |
| membrane metallo endopeptidase                                                                                      | Mme                            | 1.63 | 0.80 | A_52_P93837  | NM_008604        |
| integrin alpha 5 (fibronectin receptor alpha)                                                                       | Itga5<br>32304<br>01M21        | 1.63 | 0.28 | A_52_P364140 | NM_010577        |
| WD repeat domain 90                                                                                                 | Rik                            | 1.63 | 0.80 | A_51_P299216 | BC043315         |
| cytochrome c oxidase subunit VIb polypeptide 2                                                                      | Cox6b<br>2                     | 1.63 | 0.30 | A_51_P300506 | NM_183405        |
| predicted gene, 547127; transmembrane protein 181                                                                   | Gpr17<br>8                     | 1.63 | 0.80 | A_52_P503927 | NM_00103317<br>8 |
| MAD homolog 6 (Drosophila)                                                                                          | Smad6                          | 1.63 | 0.80 | A_51_P427926 | NM_008542        |
| glucose 6 phosphatase, catalytic, 3                                                                                 | G6pc3                          | 1.63 | 0.00 | A_51_P430555 | NM_175935        |
| expressed sequence AI467606                                                                                         | AI467<br>606                   | 1.63 | 0.55 | A_52_P458000 | NM_178901        |
| trehalase (brush-border membrane glycoprotein)                                                                      | Treh                           | 1.63 | 0.55 | A_51_P314135 | NM_021481        |
| predicted gene 8186; small nuclear ribonucleoprotein polypeptide G                                                  | Snrpg                          | 1.63 | 0.80 | A_51_P200134 | NM_026506        |
| SEC14 and spectrin domains 1; predicted gene 9165                                                                   | Sestd1                         | 1.62 | 0.18 | A_52_P415821 | AK005322         |
| protein phosphatase 1, regulatory subunit 3D                                                                        | Ppp1r3<br>d                    | 1.62 | 0.40 | A_51_P169516 | XM_141580        |
| polycystic kidney and hepatic disease 1                                                                             | Pkhd1<br>50314                 | 1.62 | 0.30 | A_52_P377941 | NM_153179        |
| RIKEN cDNA 5031425E22 gene                                                                                          | 25E22<br>Rik<br>49305<br>38D17 | 1.62 | 0.28 | A_52_P217492 | AK017143         |
| transmembrane protein 180                                                                                           | Rik                            | 1.62 | 0.40 | A_51_P345792 | NM_029186        |
| tubulin, alpha 4A                                                                                                   | Tuba4                          | 1.62 | 0.40 | A_52_P676271 | NM_009447        |
| WW domain containing E3 ubiquitin protein ligase 2                                                                  | Wwp2                           | 1.62 | 0.55 | A_51_P386358 | NM_025830        |
| brain derived neurotrophic factor                                                                                   | Bdnf                           | 1.61 | 0.55 | A_51_P261991 | NM_007540        |
| nuclear transcription factor-Y alpha                                                                                | Nfya                           | 1.61 | 0.80 | A_52_P550049 | BC057099         |
| TAO kinase 2                                                                                                        | Taok2                          | 1.61 | 0.55 | A_52_P566005 | AK129235         |
| colony stimulating factor 2 receptor, alpha, low-affinity                                                           | Csf2ra                         | 1.61 | 0.92 | A_51_P341465 | NM_009970        |

|                                                                                                                                                                                                                                                                      |                                         |      |      |              |                  |
|----------------------------------------------------------------------------------------------------------------------------------------------------------------------------------------------------------------------------------------------------------------------|-----------------------------------------|------|------|--------------|------------------|
| (granulocyte-macrophage)                                                                                                                                                                                                                                             |                                         |      |      |              |                  |
| RIKEN cDNA 2310079N02<br>gene                                                                                                                                                                                                                                        | 23100<br>79N02<br>Rik<br>27000<br>94F01 | 1.61 | 0.28 | A_51_P511707 | NM_025636        |
| transmembrane protein 209                                                                                                                                                                                                                                            | Rik                                     | 1.61 | 0.92 | A_52_P41294  | NM_178625        |
| T-cell acute lymphocytic<br>leukemia 1                                                                                                                                                                                                                               | Tal1                                    | 1.61 | 0.28 | A_51_P255853 | NM_011527        |
| a disintegrin and<br>metallopeptidase domain 23;<br>similar to ADAM23                                                                                                                                                                                                | Adam2<br>3                              | 1.61 | 0.30 | A_51_P282144 | NM_011780        |
| solute carrier family 16<br>(monocarboxylic acid<br>transporters), member 7                                                                                                                                                                                          | Slc16a<br>7                             | 1.61 | 0.44 | A_52_P408736 | AK085398         |
| RIKEN cDNA 1110007C09<br>gene                                                                                                                                                                                                                                        | 11100<br>07C09<br>Rik                   | 1.61 | 0.28 | A_51_P252677 | NM_026738        |
| predicted gene 9992;<br>predicted gene 8597; similar<br>to unc-93 homolog A; unc-93<br>homolog A (C. elegans)                                                                                                                                                        | Unc93<br>a                              | 1.61 | 0.80 | A_52_P326664 | NM_199252        |
| predicted gene, EG434795;<br>hypothetical protein<br>LOC100048591; DNA<br>segment, Chr X, Baylor 18;<br>similar to melanoma<br>associated antigen (mutated)<br>1-like 1; predicted gene,<br>OTTMUSG00000017677                                                       | LOC5<br>74405                           | 1.61 | 0.18 | A_52_P166292 | NM_00102538<br>4 |
| synaptotagmin XI; similar to<br>synaptotagmin XI                                                                                                                                                                                                                     | Syt11                                   | 1.61 | 0.00 | A_51_P260730 | NM_018804        |
| predicted gene 8624;<br>predicted gene 9701;<br>predicted gene 8467;<br>predicted gene 15450;<br>ribosomal protein S23;<br>similar to yeast ribosomal<br>protein S28 homologue;<br>predicted gene 5148; similar<br>to ribosomal protein S23;<br>predicted gene 10054 | LOC3<br>81438                           | 1.61 | 0.18 | A_52_P214408 | NM_198657        |
| lamin A                                                                                                                                                                                                                                                              | Lmna                                    | 1.61 | 0.30 | A_52_P137765 | NM_019390        |
| mediator complex subunit 23                                                                                                                                                                                                                                          | Crsp3                                   | 1.61 | 0.92 | A_51_P190124 | NM_027347        |
| E2F transcription factor 7                                                                                                                                                                                                                                           | E2f7                                    | 1.61 | 0.92 | A_52_P374997 | NM_178609        |
| pleckstrin homology domain-<br>containing, family A<br>(phosphoinositide binding<br>specific) member 2                                                                                                                                                               | Plekha<br>2                             | 1.60 | 0.44 | A_52_P78257  | NM_031257        |
| histone cluster 2, H3b;                                                                                                                                                                                                                                              | Hist1h                                  |      |      |              |                  |
| histone cluster 1, H3f;                                                                                                                                                                                                                                              | 3d                                      | 1.60 | 0.40 | A_51_P492488 | NM_178204        |



|                                |       |      |      |              |             |
|--------------------------------|-------|------|------|--------------|-------------|
| histone cluster 1, H3e;        |       |      |      |              |             |
| histone cluster 2, H3c1;       |       |      |      |              |             |
| histone cluster 1, H3d;        |       |      |      |              |             |
| histone cluster 1, H3c;        |       |      |      |              |             |
| histone cluster 1, H3b;        |       |      |      |              |             |
| histone cluster 2, H3c2;       |       |      |      |              |             |
| histone cluster 2, H2aa1;      |       |      |      |              |             |
| histone cluster 2, H2aa2       |       |      |      |              |             |
| predicted gene 8655;           |       |      |      |              |             |
| predicted gene 5145;           |       |      |      |              |             |
| predicted gene 8587; small     |       |      |      |              |             |
| nuclear ribonucleoprotein      |       |      |      |              |             |
| polypeptide A; predicted       |       |      |      |              |             |
| gene 5161                      | Snrpa | 1.60 | 0.28 | A_51_P389978 | BC003229    |
| villin 1                       | Vil1  | 1.60 | 0.67 | A_51_P381409 | NM_009509   |
| family with sequence           | BC038 |      |      |              |             |
| similarity 113, member B       | 822   | 1.60 | 0.30 | A_51_P402913 | NM_172293   |
| unc-84 homolog B (C.           | Unc84 |      |      |              |             |
| elegans)                       | b     | 1.60 | 0.30 | A_51_P324120 | NM_194342   |
|                                | 26100 |      |      |              |             |
| RIKEN cDNA 2610002J02          | 02J02 |      |      |              | NM_00103313 |
| gene                           | Rik   | 1.60 | 0.18 | A_52_P539361 | 4           |
| recombination activating       | Rag1a |      |      |              |             |
| gene 1 activating protein 1    | p1    | 1.60 | 0.28 | A_52_P658513 | NM_009057   |
| valyl-tRNA synthetase          | Vars2 | 1.60 | 0.92 | A_51_P203501 | NM_011690   |
| heterogeneous nuclear          |       |      |      |              |             |
| ribonucleoprotein L            | Hnrpl | 1.60 | 0.28 | A_51_P181571 | NM_177301   |
| similar to SH2/SH3 adaptor     |       |      |      |              |             |
| protein; non-catalytic region  |       |      |      |              |             |
| of tyrosine kinase adaptor     |       |      |      |              |             |
| protein 2; predicted gene      |       |      |      |              |             |
| 6226                           | Nck2  | 1.60 | 0.80 | A_52_P372925 | NM_010879   |
| Treacher Collins               |       |      |      |              |             |
| Franceschetti syndrome 1,      |       |      |      |              |             |
| homolog                        | Tcof1 | 1.60 | 0.28 | A_51_P160284 | NM_011552   |
| potassium channel, subfamily   | Kcnk1 |      |      |              |             |
| K, member 13                   | 3     | 1.59 | 0.67 | A_51_P167763 | NM_146037   |
| sema domain,                   |       |      |      |              |             |
| immunoglobulin domain (Ig),    |       |      |      |              |             |
| short basic domain, secreted,  | Sema3 |      |      |              |             |
| (semaphorin) 3F                | f     | 1.59 | 0.80 | A_52_P498231 | NM_011349   |
| protein kinase, X-linked       | Prkx  | 1.59 | 0.28 | A_51_P179864 | NM_016979   |
| protein phosphatase 1F         |       |      |      |              |             |
| (PP2C domain containing)       | Ppm1f | 1.59 | 0.30 | A_51_P224564 | NM_176833   |
| non imprinted in Prader-       |       |      |      |              |             |
| Willi/Angelman syndrome 1      |       |      |      |              |             |
| homolog (human)                | Nipa1 | 1.59 | 0.92 | A_51_P122035 | NM_153578   |
| histone deacetylase 7; similar | Hdac7 |      |      |              |             |
| to histone deacetylase 7A      | a     | 1.59 | 0.28 | A_52_P435016 | NM_019572   |
| zinc finger CCCH type          | Zc3h1 |      |      |              |             |
| containing 12D                 | 2d    | 1.59 | 0.55 | A_52_P648688 | NM_172785   |

|                                                                                                                                                                                                                                                                                                                                                 |           |      |      |               |           |
|-------------------------------------------------------------------------------------------------------------------------------------------------------------------------------------------------------------------------------------------------------------------------------------------------------------------------------------------------|-----------|------|------|---------------|-----------|
| tripartite motif protein 8                                                                                                                                                                                                                                                                                                                      | Trim8     | 1.59 | 0.28 | A_52_P332513  | BC024694  |
| tumor necrosis factor receptor superfamily, member 10b                                                                                                                                                                                                                                                                                          | Tnfrsf10b | 1.59 | 0.28 | A_52_P10134   | NM_020275 |
| kinesin family member 23                                                                                                                                                                                                                                                                                                                        | Kif23     | 1.59 | 0.28 | A_51_P324287  | NM_024245 |
| diacylglycerol kinase zeta                                                                                                                                                                                                                                                                                                                      | Dgkz      | 1.59 | 0.18 | A_51_P505156  | NM_138306 |
| CTD (carboxy-terminal domain, RNA polymerase II, polypeptide A) small phosphatase 2                                                                                                                                                                                                                                                             | Ctdsp2    | 1.59 | 0.44 | A_52_P432685  | NM_146012 |
| solute carrier family 26, member 10                                                                                                                                                                                                                                                                                                             | C78409    | 1.59 | 0.80 | A_52_P140881  | NM_177615 |
| cell division cycle 42 homolog (S. cerevisiae); predicted gene 7407                                                                                                                                                                                                                                                                             | Cdc42     | 1.59 | 0.28 | A_51_P230977  | NM_009861 |
| G protein-coupled receptor 183                                                                                                                                                                                                                                                                                                                  | Ebi2      | 1.58 | 0.28 | A_51_P358683  | NM_183031 |
| RIKEN cDNA 5930416I19 gene                                                                                                                                                                                                                                                                                                                      | 16I19Rik  | 1.58 | 0.55 | A_52_P268549  | NM_197981 |
| predicted gene 5353; immunoglobulin heavy chain (J558 family); similar to Ig heavy chain V region 108A precursor; similar to Ig heavy chain V-I region V35 precursor; predicted gene 900; immunoglobulin heavy chain complex; similar to Ig H-chain V-JH1-region; immunoglobulin heavy variable V1-31; immunoglobulin heavy chain 2 (serum IgA) | Igh-VJ558 | 1.58 | 0.80 | A_52_P139027  | U39781    |
| DEP domain containing 1a                                                                                                                                                                                                                                                                                                                        | Depdc1a   | 1.58 | 0.40 | A_52_P290325  | NM_029523 |
| glycerol kinase                                                                                                                                                                                                                                                                                                                                 | Gyk       | 1.58 | 0.28 | A_52_P1020291 | NM_008194 |
| solute carrier family 12, member 4                                                                                                                                                                                                                                                                                                              | Slc12a4   | 1.58 | 0.28 | A_51_P251256  | NM_009195 |
| glycerol kinase                                                                                                                                                                                                                                                                                                                                 | Gyk       | 1.58 | 0.28 | A_52_P1020291 | NM_212444 |
| p21 protein (Cdc42/Rac)-activated kinase 1                                                                                                                                                                                                                                                                                                      | Pak1      | 1.58 | 0.80 | A_51_P385054  | NM_011035 |
| sacsin                                                                                                                                                                                                                                                                                                                                          | Sacs      | 1.57 | 0.80 | A_52_P578043  | AK173011  |
| inhibin beta-B                                                                                                                                                                                                                                                                                                                                  | Inhbb     | 1.57 | 0.40 | A_51_P325904  | NM_008381 |
| polymerase (RNA) III (DNA directed) polypeptide G like                                                                                                                                                                                                                                                                                          | Polr3gl   | 1.57 | 0.44 | A_51_P467233  | NM_027241 |
| myeloid leukemia factor 1 interacting protein                                                                                                                                                                                                                                                                                                   | Mlflip    | 1.57 | 0.67 | A_52_P415931  | NM_027973 |
| transforming growth factor beta 1 induced transcript 1                                                                                                                                                                                                                                                                                          | Tgfb1i1   | 1.57 | 0.55 | A_51_P366344  | NM_009365 |
| RIKEN cDNA 6330442E10                                                                                                                                                                                                                                                                                                                           | 63304     | 1.57 | 0.28 | A_52_P220783  | NM_178745 |

|                                                                                                                                         |        |      |      |              |             |
|-----------------------------------------------------------------------------------------------------------------------------------------|--------|------|------|--------------|-------------|
| gene                                                                                                                                    | 42E10  |      |      |              |             |
|                                                                                                                                         | Rik    |      |      |              |             |
|                                                                                                                                         | 18100  |      |      |              |             |
| RIKEN cDNA 1810064F22                                                                                                                   | 64F22  |      |      |              | NM_00103315 |
| gene                                                                                                                                    | Rik    | 1.57 | 0.44 | A_52_P343381 | 1           |
| ATP-binding cassette, sub-family A (ABC1), member 5                                                                                     | Abca5  | 1.57 | 0.28 | A_52_P519653 | NM_147219   |
|                                                                                                                                         | Trim6  |      |      |              |             |
| tripartite motif-containing 68                                                                                                          | 8      | 1.57 | 0.80 | A_51_P490678 | NM_198012   |
| UPF3 regulator of nonsense transcripts homolog A (yeast)                                                                                | Upf3a  | 1.57 | 0.18 | A_51_P410830 | AK145471    |
| similar to growth arrest-specific 2 like 3; growth arrest-specific 2 like 3                                                             | Gas2l3 | 1.57 | 0.30 | A_52_P328492 | AK164505    |
| matrix metalloproteinase 2                                                                                                              | Mmp2   | 1.57 | 0.67 | A_51_P341736 | NM_008610   |
| Meis homeobox 1                                                                                                                         | Meis1  | 1.57 | 0.28 | A_52_P26195  | NM_010789   |
| RAB32, member RAS oncogene family                                                                                                       | Rab32  | 1.57 | 0.80 | A_51_P293688 | NM_026405   |
|                                                                                                                                         | 67204  |      |      |              |             |
|                                                                                                                                         | 58D17  |      |      |              |             |
| integrin alpha 9                                                                                                                        | Rik    | 1.56 | 0.28 | A_52_P542645 | AK032822    |
| DNA methyltransferase (cytosine-5) 1                                                                                                    | Dnmt1  | 1.56 | 0.44 | A_51_P195573 | NM_010066   |
|                                                                                                                                         | Mterfd |      |      |              |             |
| MTERF domain containing 3                                                                                                               | 3      | 1.56 | 0.92 | A_51_P202623 | NM_028832   |
|                                                                                                                                         | 49305  |      |      |              |             |
| RIKEN cDNA 4930547N16                                                                                                                   | 47N16  |      |      |              |             |
| gene                                                                                                                                    | Rik    | 1.56 | 0.28 | A_51_P480796 | NM_029249   |
| transmembrane 9 superfamily protein member 4                                                                                            | Tm9sf  |      |      |              |             |
|                                                                                                                                         | 4      | 1.56 | 0.18 | A_51_P483922 | NM_133847   |
|                                                                                                                                         | 15000  |      |      |              |             |
| RIKEN cDNA 1500010J02                                                                                                                   | 10J02  |      |      |              |             |
| gene                                                                                                                                    | Rik    | 1.56 | 0.40 | A_51_P211526 | NM_026889   |
| arrestin, beta 1                                                                                                                        | Arrb1  | 1.56 | 0.30 | A_51_P436727 | NM_177231   |
| cytochrome P450, family 4, subfamily f, polypeptide 16                                                                                  | Cyp4f  |      |      |              |             |
|                                                                                                                                         | 16     | 1.56 | 0.40 | A_51_P487869 | NM_024442   |
| solute carrier family 18 (vesicular monoamine), member 2                                                                                | Slc18a |      |      |              |             |
|                                                                                                                                         | 2      | 1.56 | 0.30 | A_52_P515572 | NM_172523   |
| platelet/endothelial cell adhesion molecule 1                                                                                           | Pecam  |      |      |              |             |
|                                                                                                                                         | 1      | 1.56 | 0.80 | A_51_P400868 | NM_008816   |
| similar to UDP-Gal:betaGal beta 1,3-galactosyltransferase, polypeptide 6; UDP-Gal:betaGal beta 1,3-galactosyltransferase, polypeptide 6 | B3galt |      |      |              |             |
|                                                                                                                                         | 6      | 1.56 | 0.80 | A_51_P211334 | NM_080445   |
| alkylglycerone phosphate synthase                                                                                                       | Agps   | 1.56 | 0.92 | A_51_P399504 | NM_172666   |
| dual specificity phosphatase                                                                                                            | Dusp8  | 1.55 | 0.44 | A_51_P263246 | NM_008748   |

|                                                                                                                                                           |                       |      |      |              |           |  |
|-----------------------------------------------------------------------------------------------------------------------------------------------------------|-----------------------|------|------|--------------|-----------|--|
| 8                                                                                                                                                         |                       |      |      |              |           |  |
| integrin beta 5                                                                                                                                           | Itgb5                 | 1.55 | 0.28 | A_51_P327796 | NM_010580 |  |
| similar to c-Maf long form;<br>avian musculoaponeurotic<br>fibrosarcoma (v-maf) AS42<br>oncogene homolog                                                  | Maf                   | 1.55 | 0.80 | A_52_P306079 | S74567    |  |
| purine rich element binding<br>protein B                                                                                                                  | Purb                  | 1.55 | 0.28 | A_51_P433091 | AK009365  |  |
| mitogen-activated protein<br>kinase kinase kinase 1                                                                                                       | Map3k<br>1            | 1.55 | 0.92 | A_51_P402193 | NM_011945 |  |
| solute carrier family 12<br>(potassium/chloride<br>transporters), member 8                                                                                | Slc12a<br>8           | 1.55 | 0.28 | A_51_P476618 | NM_134251 |  |
| claspin homolog ( <i>Xenopus<br/>laevis</i> )                                                                                                             | Clspn                 | 1.55 | 0.18 | A_52_P476075 | NM_175554 |  |
| solute carrier family 39 (zinc<br>transporter), member 10                                                                                                 | Slc39a<br>10          | 1.55 | 0.28 | A_51_P223498 | NM_172653 |  |
| LIM domain only 7                                                                                                                                         | Lmo7                  | 1.55 | 0.67 | A_52_P68755  | NM_201529 |  |
| ADP-ribosylation factor 4                                                                                                                                 | Arf4                  | 1.55 | 0.28 | A_51_P295625 | NM_007479 |  |
| DnaJ (Hsp40) homolog,<br>subfamily C, member 5 beta                                                                                                       | Dnajc5<br>b           | 1.55 | 0.28 | A_52_P396749 | NM_025489 |  |
| major facilitator superfamily<br>domain containing 10                                                                                                     | 06100<br>09O03<br>Rik | 1.55 | 0.92 | A_51_P410022 | NM_026660 |  |
| similar to protein tyrosine<br>phosphatase domain<br>containing 1 protein; protein<br>tyrosine phosphatase domain<br>containing 1; predicted gene<br>2719 | AW45<br>6874          | 1.55 | 0.28 | A_51_P123623 | NM_207232 |  |
| euchromatic histone lysine<br>N-methyltransferase 2                                                                                                       | Ehmt2<br>Nomo<br>1    | 1.55 | 0.28 | A_51_P343016 | NM_145830 |  |
| nodal modulator 1                                                                                                                                         | 1                     | 1.55 | 0.30 | A_51_P105520 | NM_153057 |  |
| calponin 2                                                                                                                                                | Cnn2                  | 1.54 | 0.92 | A_51_P427663 | NM_007725 |  |
| predicted gene 7603;<br>adaptor-related protein<br>complex 3, sigma 1 subunit;<br>predicted gene 5610                                                     | Ap3s1                 | 1.54 | 0.80 | A_51_P246962 | NM_009681 |  |
| proacrosin binding protein<br>polymerase (DNA directed),<br>kappa                                                                                         | Acrbp                 | 1.54 | 0.40 | A_51_P356265 | NM_016845 |  |
| Yip1 interacting factor<br>homolog B ( <i>S. cerevisiae</i> )                                                                                             | Polk                  | 1.54 | 0.28 | A_51_P363588 | NM_012048 |  |
| WD repeat domain 1                                                                                                                                        | Yif1b                 | 1.54 | 0.44 | A_51_P256842 | NM_029887 |  |
| phosphoglucomutase 1                                                                                                                                      | Wdr1                  | 1.54 | 0.44 | A_51_P184773 | NM_011715 |  |
| mesoderm development<br>candidate 1                                                                                                                       | Pgm1                  | 1.54 | 0.67 | A_51_P427530 | NM_025700 |  |
|                                                                                                                                                           | Mesdc<br>1            | 1.54 | 0.55 | A_52_P293232 | NM_030705 |  |
| family with sequence<br>similarity 176, member B                                                                                                          | 26100<br>27C15<br>Rik | 1.54 | 0.28 | A_52_P678056 | NM_172145 |  |

|                                                                                                                                                                                                                                  |                |      |      |              |              |
|----------------------------------------------------------------------------------------------------------------------------------------------------------------------------------------------------------------------------------|----------------|------|------|--------------|--------------|
| CUE domain containing 2                                                                                                                                                                                                          | Cuedc2         | 1.54 | 0.80 | A_51_P403334 | NM_024192    |
| RIKEN cDNA 2010007H12 gene                                                                                                                                                                                                       | 07H12<br>Rik   | 1.54 | 0.80 | A_51_P103865 | NM_027242    |
| F-box protein 10                                                                                                                                                                                                                 | Fbxo1          | 1.53 | 0.67 | A_52_P358093 | BC094565     |
| centrosomal protein 55                                                                                                                                                                                                           | Cep55          | 1.53 | 0.28 | A_51_P509651 | NM_028760    |
| hyaluronan mediated motility receptor (RHAMM)                                                                                                                                                                                    | Hmmr           | 1.53 | 0.92 | A_52_P9656   | NM_013552    |
| Mdm2, transformed 3T3 cell double minute p53 binding protein                                                                                                                                                                     | Mtbp           | 1.53 | 0.28 | A_51_P312310 | NM_134092    |
| interleukin 1 receptor-like 2 minichromosome maintenance deficient 4 homolog ( <i>S. cerevisiae</i> )                                                                                                                            | Il1rl2<br>Mcm4 | 1.53 | 0.28 | A_52_P261184 | AK085780     |
| WAS protein family, member 2                                                                                                                                                                                                     | Wasf2          | 1.53 | 0.92 | A_51_P399373 | AK150140     |
| serine incorporator 5                                                                                                                                                                                                            | Serinc5        | 1.53 | 0.67 | A_51_P128336 | NM_172588    |
| coiled-coil and C2 domain containing 1B                                                                                                                                                                                          | Cc2d1b         | 1.53 | 0.13 | A_51_P347115 | NM_177045    |
| TAF9B RNA polymerase II, TATA box binding protein (TBP)-associated factor predicted gene 5900; similar to Mitogen-activated protein kinase kinase 1 interacting protein 1 (MEK binding partner 1) (Mp1); MAPK scaffold protein 1 | Taf9b          | 1.53 | 0.92 | A_52_P592749 | NM_001001176 |
| STE20-related kinase adaptor alpha                                                                                                                                                                                               | Map2k1ip1      | 1.53 | 0.55 | A_51_P173555 | NM_019920    |
| N-acetylneuraminic acid synthase (sialic acid synthase)                                                                                                                                                                          | 19A05<br>Rik   | 1.52 | 0.40 | A_51_P413122 | NM_028126    |
| protein phosphatase 2C, magnesium dependent, catalytic subunit                                                                                                                                                                   | Nans           | 1.52 | 0.28 | A_52_P166770 | NM_053179    |
| adaptor-related protein complex AP-1, mu subunit 1                                                                                                                                                                               | Ppm2c          | 1.52 | 0.28 | A_51_P452637 | NM_001033453 |
| zinc finger protein 280B                                                                                                                                                                                                         | Ap1m1          | 1.52 | 0.92 | A_51_P190805 | NM_007456    |
| CCR4-NOT transcription complex, subunit 3                                                                                                                                                                                        | Suhw2          | 1.52 | 0.30 | A_51_P486068 | NM_177475    |
| transmembrane protein 164                                                                                                                                                                                                        | Cnot3          | 1.52 | 0.40 | A_52_P631098 | NM_146176    |
| RAD18 homolog ( <i>S. cerevisiae</i> )                                                                                                                                                                                           | Tmem164        | 1.52 | 0.44 | A_52_P516130 | NM_177592    |
| Rap guanine nucleotide                                                                                                                                                                                                           | Rad18          | 1.52 | 0.30 | A_51_P480855 | NM_021385    |
|                                                                                                                                                                                                                                  | Rapgef         | 1.52 | 0.28 | A_51_P116906 | NM_144850    |

|                                                                             |                                     |      |      |              |                  |
|-----------------------------------------------------------------------------|-------------------------------------|------|------|--------------|------------------|
| exchange factor (GEF) 3                                                     | 3                                   |      |      |              |                  |
| Rho guanine nucleotide exchange factor (GEF7)                               | Arhgef7                             | 1.52 | 0.28 | A_51_P165210 | NM_017402        |
| thyroid hormone receptor interactor 10                                      | Trip10                              | 1.52 | 0.67 | A_51_P132549 | NM_134125        |
| dedicator of cytokinesis 7                                                  | Dock7<br>17000                      | 1.52 | 0.28 | A_51_P354094 | BC006868         |
| RIKEN cDNA 1700025G04 gene                                                  | 25G04<br>Rik                        | 1.52 | 0.67 | A_51_P328489 | NM_197990        |
| tetratricopeptide repeat domain 5; predicted gene 9387                      | LOC6<br>68831                       | 1.52 | 0.80 | A_52_P575668 | XM_00100388<br>4 |
| kinesin family member 15                                                    | Kif15<br>11100                      | 1.51 | 0.80 | A_52_P227391 | NM_010620        |
| RIKEN cDNA 1110038F14 gene                                                  | 38F14<br>Rik                        | 1.51 | 0.80 | A_51_P121447 | NM_054099        |
| ankyrin repeat domain 57                                                    | Ankrd<br>57                         | 1.51 | 0.28 | A_52_P98625  | XM_884335        |
| ankyrin repeat domain 13b myelin-associated oligodendrocytic basic protein  | Ankrd<br>13b                        | 1.51 | 0.92 | A_51_P411757 | NM_172945        |
| CDC42 effector protein (Rho GTPase binding) 5                               | Mobp<br>Cdc42<br>ep5<br>C3300       | 1.51 | 0.28 | A_52_P384465 | AK083103         |
| RIKEN cDNA C330024D12 gene                                                  | 24D12<br>Rik                        | 1.51 | 0.55 | A_51_P316243 | AK021221         |
| ATX1 (antioxidant protein 1) homolog 1 (yeast)                              | Atox1                               | 1.51 | 0.44 | A_51_P346153 | NM_009720        |
| squamous cell carcinoma antigen recognized by T-cells 3                     | Sart3                               | 1.51 | 0.92 | A_51_P212023 | NM_016926        |
| F-box and leucine-rich repeat protein 14                                    | Fbxl14                              | 1.51 | 0.28 | A_51_P113722 | NM_133940        |
| protein tyrosine phosphatase, receptor type, F RAS, dexamethasone-induced 1 | Ptprf                               | 1.51 | 0.40 | A_51_P185639 | BC052322         |
| dysbindin (dystrobrevin binding protein 1) domain containing 2              | Rasd1                               | 1.51 | 0.44 | A_52_P496726 | NM_009026        |
| RIKEN cDNA C230094A16 gene                                                  | Dbnnd<br>2<br>C2300<br>94A16<br>Rik | 1.51 | 0.80 | A_52_P256569 | NM_026797        |
| chemokine (C-C motif) receptor 7                                            | Ccr7                                | 1.51 | 0.44 | A_52_P117221 | NM_146016        |
| fractured callus expressed transcript 1; dynein heavy chain domain 1        | Ccr7                                | 1.51 | 0.44 | A_51_P420229 | NM_007719        |
| SET domain containing 5                                                     | Fxc1                                | 1.51 | 0.18 | A_51_P396854 | NM_019502        |
|                                                                             | Setd5                               | 1.51 | 0.40 | A_52_P448304 | NM_028385        |

|                                                                                                                                                                                                                                                                                 |                             |       |      |              |                          |
|---------------------------------------------------------------------------------------------------------------------------------------------------------------------------------------------------------------------------------------------------------------------------------|-----------------------------|-------|------|--------------|--------------------------|
| guanine nucleotide binding protein (G protein), beta 1                                                                                                                                                                                                                          | Gnb1                        | 1.50  | 0.30 | A_52_P304858 | AB246709                 |
| WAP, FS, Ig, KU, and NTR-containing protein 1                                                                                                                                                                                                                                   | Wfikk<br>n1                 | 1.50  | 0.28 | A_51_P301773 | BC026460                 |
| E2F transcription factor 1                                                                                                                                                                                                                                                      | E2f1                        | 1.50  | 0.28 | A_52_P587611 | NM_007891                |
| centromere protein M                                                                                                                                                                                                                                                            | Cenpm<br>Gm44               | 1.50  | 0.28 | A_51_P463087 | NM_178269                |
| RUN domain containing 3B                                                                                                                                                                                                                                                        | 0                           | 1.50  | 0.28 | A_52_P619192 | NM_198620                |
| histone cluster 2, H3b;<br>histone cluster 1, H3f;<br>histone cluster 1, H3e;<br>histone cluster 2, H3c1;<br>histone cluster 1, H3d;<br>histone cluster 1, H3c;<br>histone cluster 1, H3b;<br>histone cluster 2, H3c2;<br>histone cluster 2, H2aa1;<br>histone cluster 2, H2aa2 | Hist2h<br>3c1<br>Tmem<br>64 | 1.50  | 0.40 | A_51_P359462 | NM_178216                |
| transmembrane protein 64                                                                                                                                                                                                                                                        | 64                          | 1.50  | 0.55 | A_52_P10017  | NM_181401                |
| ubiquitin specific peptidase 43                                                                                                                                                                                                                                                 | Usp43                       | 1.50  | 0.28 | A_52_P443310 | NM_173754                |
| phosphatidylinositol 3-kinase, C2 domain containing, gamma polypeptide                                                                                                                                                                                                          | Pik3c2<br>g                 | 1.50  | 0.40 | A_51_P191077 | NM_207683                |
| nuclear receptor coactivator 2 poly (ADP-ribose) polymerase family, member 6                                                                                                                                                                                                    | Ncoa2<br>Parp6              | -1.50 | 0.36 | A_52_P21971  | BC053387                 |
| proteasome (prosome, macropain) 26S subunit, non-ATPase, 1                                                                                                                                                                                                                      | Parp6                       | -1.50 | 0.80 | A_51_P197773 | BC062096                 |
| zinc finger, FYVE domain containing 1                                                                                                                                                                                                                                           | Psm1                        | -1.50 | 0.55 | A_52_P49727  | NM_027357                |
| similar to Archain 1; archain 1; similar to coat protein delta-cop; predicted gene 8752; predicted gene 8750; similar to archain                                                                                                                                                | Zfyve1                      | -1.51 | 0.92 | A_51_P181746 | NM_183154                |
| histidine ammonia lyase                                                                                                                                                                                                                                                         | Arcn1                       | -1.51 | 0.55 | A_52_P683957 | NM_145985                |
| ubiquitin-conjugating enzyme E2K (UBC1 homolog, yeast)                                                                                                                                                                                                                          | Hal                         | -1.51 | 0.36 | A_51_P172155 | NM_010401                |
| WAP, follistatin/kazal, immunoglobulin, kunitz and netrin domain containing 2                                                                                                                                                                                                   | Hip2                        | -1.51 | 0.67 | A_51_P363714 | NM_016786                |
| interferon, alpha-inducible protein 27 like 1                                                                                                                                                                                                                                   | Wfikk<br>n2                 | -1.51 | 0.00 | A_52_P283724 | NM_181819                |
| PR domain containing 2, with ZNF domain                                                                                                                                                                                                                                         | D12Ert<br>d647e<br>Prdm2    | -1.52 | 0.36 | A_52_P86693  | NM_026790<br>NM_00108135 |
|                                                                                                                                                                                                                                                                                 |                             | -1.52 | 0.92 | A_52_P25812  | 5                        |

|                                                                                                    |                         |       |      |              |                  |
|----------------------------------------------------------------------------------------------------|-------------------------|-------|------|--------------|------------------|
| glutaminase                                                                                        | Gls                     | -1.52 | 0.36 | A_51_P365489 | AK079838         |
| solute carrier family 31,<br>member 1                                                              | Slc31a<br>1             | -1.52 | 0.40 | A_52_P563655 | NM_175090        |
| hect domain and RLD 4                                                                              | Herc4<br>D6300<br>02J15 | -1.52 | 0.55 | A_52_P329019 | NM_026101        |
| transmembrane protein 213                                                                          | Rik                     | -1.52 | 0.44 | A_51_P401501 | AK021320         |
| CD302 antigen                                                                                      | Cd302<br>49334          | -1.52 | 0.92 | A_51_P514623 | NM_025422        |
| RIKEN cDNA 4933403F05<br>gene                                                                      | 03F05<br>Rik            | -1.52 | 0.55 | A_52_P416727 | NM_153794        |
| radixin                                                                                            | Rdx                     | -1.53 | 0.92 | A_52_P571684 | NM_009041        |
| trans-acting transcription<br>factor 4                                                             | Sp4                     | -1.53 | 0.80 | A_51_P479758 | NM_009239        |
| ATP-binding cassette, sub-<br>family C (CFTR/MRP),<br>member 9                                     | Abcc9                   | -1.53 | 0.36 | A_51_P328850 | NM_021041        |
| importin 7                                                                                         | Ipo7                    | -1.53 | 0.80 | A_52_P600851 | NM_181517        |
| solute carrier family 25<br>(mitochondrial carrier,<br>peroxisomal membrane<br>protein), member 17 | Slc25a<br>17            | -1.53 | 0.44 | A_51_P181170 | NM_011399        |
| Kv channel-interacting<br>protein 1                                                                | Kcnip1                  | -1.53 | 0.55 | A_51_P117087 | NM_027398        |
| solute carrier family 3,<br>member 1                                                               | Slc3a1                  | -1.53 | 0.36 | A_51_P391727 | NM_009205        |
| glutathione S-transferase,<br>alpha 3                                                              | Gsta3<br>62304<br>16A05 | -1.54 | 0.36 | A_52_P432124 | NM_010356        |
| coiled-coil domain<br>containing 90A                                                               | Rik                     | -1.54 | 0.36 | A_51_P308681 | AK018089         |
| amyloid beta (A4) precursor<br>protein-binding, family B,<br>member 2                              | Apbb2                   | -1.54 | 0.36 | A_51_P149562 | NM_009686        |
| pantothenate kinase 1                                                                              | Pank1                   | -1.54 | 0.55 | A_51_P263591 | NM_023792        |
| PQ loop repeat containing 1                                                                        | Pqlc1                   | -1.54 | 0.67 | A_51_P341369 | NM_025861        |
| coagulation factor VII                                                                             | F7                      | -1.54 | 0.67 | A_51_P484054 | NM_010172        |
| SEC16 homolog B ( <i>S.</i><br><i>cerevisiae</i> )                                                 | Lztr2                   | -1.54 | 0.67 | A_51_P470751 | NM_033354        |
| Smg-6 homolog, nonsense<br>mediated mRNA decay<br>factor ( <i>C. elegans</i> )                     | Smg6<br>17001           | -1.54 | 0.44 | A_52_P355276 | NM_00100276<br>4 |
| La ribonucleoprotein domain<br>family, member 2                                                    | 08L22<br>Rik            | -1.54 | 0.44 | A_51_P201237 | NM_00104039<br>9 |
| RAR-related orphan receptor<br>gamma                                                               | Rorc                    | -1.54 | 0.92 | A_51_P282930 | NM_011281        |
| thioredoxin-like 1                                                                                 | Txn1l                   | -1.54 | 0.92 | A_52_P183152 | NM_016792        |
| endoplasmic reticulum-golgi<br>intermediate compartment                                            | 12000<br>07D18          | -1.54 | 0.92 | A_52_P69707  | NM_026170        |



|                                                                                             |                       |       |      |              |           |
|---------------------------------------------------------------------------------------------|-----------------------|-------|------|--------------|-----------|
| (ERGIC) 1                                                                                   | Rik                   |       |      |              |           |
| S1 RNA binding domain 1                                                                     | Srbd1<br>49314        | -1.54 | 0.36 | A_52_P380460 | NM_030133 |
| pleckstrin and Sec7 domain<br>containing 3                                                  | 20C21<br>Rik          | -1.54 | 0.67 | A_52_P682330 | AK147606  |
| chemokine (C-X-C motif)<br>ligand 12                                                        | Cxcl12<br>A1300       | -1.55 | 0.44 | A_52_P685021 | NM_021704 |
| ubiquitin protein ligase E3<br>component n-recognin 3                                       | 30D10<br>Rik          | -1.55 | 0.36 | A_52_P160418 | NM_177783 |
|                                                                                             | 18100                 |       |      |              |           |
| par-3 partitioning defective 3<br>homolog B (C. elegans)                                    | 08K04<br>Rik          | -1.55 | 0.36 | A_52_P257532 | AK007379  |
|                                                                                             | 23100                 |       |      |              |           |
| RIKEN cDNA 2310044G17<br>gene                                                               | 44G17<br>Rik          | -1.55 | 0.92 | A_51_P453398 | AK122546  |
| SH3-domain binding protein<br>2                                                             | Sh3bp<br>2            | -1.55 | 0.44 | A_51_P364632 | NM_011893 |
| pellino 2                                                                                   | Peli2                 | -1.55 | 0.67 | A_52_P266033 | AK030564  |
| cytochrome P450, family 2,<br>subfamily d, polypeptide 34                                   | BC018<br>285          | -1.55 | 0.44 | A_51_P217395 | NM_145474 |
| interferon-induced protein<br>with tetratricopeptide repeats<br>3                           | Ifit3                 | -1.56 | 0.92 | A_51_P359570 | NM_010501 |
| cell growth regulator with<br>ring finger domain 1                                          | Cgrrf1<br>Dnase       | -1.56 | 0.36 | A_51_P331462 | NM_026832 |
|                                                                                             | 2b                    | -1.56 | 0.80 | A_51_P166099 | NM_019957 |
| deoxyribonuclease II beta<br>glutathione S-transferase, mu<br>6                             | Gstm6                 | -1.56 | 0.92 | A_52_P415996 | NM_008184 |
| proteasome (prosome,<br>macropain) 26S subunit, non-<br>ATPase, 7                           | Psm7                  | -1.57 | 0.55 | A_51_P487933 | NM_010817 |
| centaurin, beta 1                                                                           | Centb1                | -1.57 | 0.36 | A_51_P273489 | AK133473  |
| chloride channel 2                                                                          | Clcn2                 | -1.57 | 0.36 | A_51_P332141 | NM_009900 |
| nudix (nucleoside<br>diphosphate linked moiety<br>X)-type motif 9                           | Nudt9<br>Arl6ip       | -1.57 | 0.44 | A_51_P110814 | NM_028794 |
|                                                                                             | 2                     | -1.57 | 0.67 | A_51_P316993 | NM_019717 |
| atlastin GTPase 2                                                                           | Hdac8                 | -1.57 | 0.35 | A_52_P464062 | NM_027382 |
| histone deacetylase 8                                                                       | BC022                 |       |      |              |           |
| dehydrogenase/reductase<br>(SDR family) member 11                                           | 224                   | -1.57 | 0.92 | A_51_P432851 | NM_177564 |
| lipoic acid synthetase                                                                      | Lias                  | -1.58 | 0.44 | A_52_P243182 | NM_024471 |
| predicted gene, EG634650;<br>guanylate-binding protein 10;<br>RIKEN cDNA 5830443L24<br>gene | 58304<br>43L24<br>Rik | -1.58 | 0.92 | A_52_P544421 | NM_029509 |
|                                                                                             | 91300                 |       |      |              |           |
|                                                                                             | 22K13                 |       |      |              |           |
| apolipoprotein L 7a                                                                         | Rik                   | -1.58 | 0.55 | A_51_P497724 | NM_029419 |

|                                                                                                                        |                        |       |      |              |                          |
|------------------------------------------------------------------------------------------------------------------------|------------------------|-------|------|--------------|--------------------------|
| cysteine sulfinic acid<br>decarboxylase                                                                                | Csad<br>48314          | -1.58 | 0.36 | A_51_P325776 | NM_144942                |
| RIKEN cDNA 4831440D22<br>gene                                                                                          | 40D22<br>Rik           | -1.58 | 0.36 | A_51_P241653 | AK029243                 |
| DNA segment, Chr 14,<br>ERATO Doi 436, expressed                                                                       | D14Ert<br>d436e        | -1.58 | 0.55 | A_52_P81252  | NM_172599                |
| integral membrane protein<br>2B                                                                                        | Itm2b                  | -1.58 | 0.23 | A_51_P125513 | NM_008410                |
| threonine synthase-like 2<br>(bacterial)                                                                               | BC051<br>244           | -1.58 | 0.55 | A_52_P487599 | NM_178413                |
| propionyl Coenzyme A<br>carboxylase, beta polypeptide<br>SET and MYND domain<br>containing 3                           | Pccb                   | -1.59 | 0.36 | A_51_P418259 | NM_025835                |
| glyoxalase 1                                                                                                           | Smyd3<br>Glo1<br>13000 | -1.59 | 0.55 | A_51_P229325 | NM_027188                |
|                                                                                                                        | Glo1<br>13000          | -1.59 | 0.36 | A_52_P670745 | NM_025374                |
| solute carrier family 47,<br>member 1                                                                                  | 13J15<br>Rik           | -1.59 | 0.40 | A_51_P511927 | NM_026183<br>NM_00103952 |
| dynammin 2                                                                                                             | Dnm2                   | -1.59 | 0.67 | A_52_P177260 | 0                        |
| similar to polycomb group<br>ring finger 5; polycomb<br>group ring finger 5                                            | Pcgf5                  | -1.59 | 0.36 | A_51_P407989 | NM_029508                |
| protein kinase domain<br>containing, cytoplasmic<br>splicing factor,<br>arginine/serine-rich 2,<br>interacting protein | AW54<br>8124           | -1.60 | 0.36 | A_52_P299535 | NM_134117                |
| zinc finger, CCHC domain<br>containing 6                                                                               | Sfrs2ip                | -1.60 | 0.44 | A_52_P371918 | NM_028148                |
| sushi, nidogen and EGF-like<br>domains 1                                                                               | Zcchc6                 | -1.61 | 0.67 | A_51_P225761 | AK031537                 |
| glucan (1,4-alpha-),<br>branching enzyme 1                                                                             | Sned1                  | -1.61 | 0.80 | A_52_P602188 | NM_172463                |
| ADP-ribosylation factor<br>related protein 1                                                                           | Gbe1                   | -1.61 | 0.55 | A_51_P273684 | NM_028803                |
| protein phosphatase 2<br>(formerly 2A), regulatory<br>subunit B", alpha; RIKEN<br>cDNA 3222402P14 gene                 | Arfrp1                 | -1.61 | 0.80 | A_52_P153497 | NM_029702                |
| major facilitator superfamily<br>domain containing 1                                                                   | 32224<br>02P14<br>Rik  | -1.61 | 0.80 | A_51_P270960 | BC031532                 |
| sialic acid binding Ig-like<br>lectin 1, sialoadhesin                                                                  | Mfsd1                  | -1.62 | 0.92 | A_51_P500550 | NM_025813                |
| cell division cycle 37<br>homolog ( <i>S. cerevisiae</i> )-like<br>1                                                   | Siglec<br>1            | -1.62 | 0.36 | A_51_P359891 | NM_011426                |
| Rap guanine nucleotide<br>exchange factor (GEF) 6                                                                      | Cdc371<br>1            | -1.62 | 0.55 | A_52_P676406 | NM_025950                |
| similar to zinc finger and                                                                                             | Rapgef<br>6            | -1.62 | 0.92 | A_51_P407209 | NM_175258                |
|                                                                                                                        | Zbtb40                 | -1.62 | 0.36 | A_52_P162659 | NM_198248                |

|                                                                          |                       |       |      |              |           |
|--------------------------------------------------------------------------|-----------------------|-------|------|--------------|-----------|
| BTB domain containing 40;<br>zinc finger and BTB domain<br>containing 40 | Olfr69                |       |      |              |           |
| olfactory receptor 690                                                   | 0                     | -1.63 | 0.36 | A_51_P211064 | NM_020290 |
| carboxypeptidase N,<br>polypeptide 2                                     | Cpn2                  | -1.63 | 0.92 | A_51_P170562 | BC025836  |
| SUMO1/sentrin specific<br>peptidase 7                                    | Senp7                 | -1.63 | 0.36 | A_51_P462516 | NM_025483 |
| ADP-ribosylation factor-like<br>13B                                      | Arl13b                | -1.63 | 0.80 | A_51_P409985 | NM_026577 |
| cyclin T1                                                                | Ccnt1                 | -1.63 | 0.44 | A_51_P356425 | NM_009833 |
| proteasome (prosome,<br>macropain) 26S subunit,<br>ATPase, 4             | Psmc4                 | -1.63 | 0.35 | A_51_P108051 | NM_011874 |
| tetraspanin 1                                                            | Tspan1                | -1.63 | 0.67 | A_51_P333923 | NM_133681 |
| serine<br>hydroxymethyltransferase 1<br>(soluble)                        | Shmt1                 | -1.63 | 0.55 | A_52_P673499 | NM_009171 |
| zinc finger protein 36, C3H<br>type-like 1                               | Zfp361<br>1           | -1.64 | 0.36 | A_51_P235801 | NM_007564 |
| trafficking protein, kinesin<br>binding 1                                | Trak1                 | -1.64 | 0.67 | A_51_P437021 | BC058971  |
| coiled-coil domain<br>containing 91                                      | Ccdc9<br>1            | -1.64 | 0.40 | A_52_P311129 | NM_025911 |
| dpy-19-like 1 (C. elegans)                                               | Dpy19<br>11           | -1.64 | 0.40 | A_51_P518528 | NM_172920 |
| diaphanous homolog 2<br>(Drosophila)                                     | Diap2                 | -1.64 | 0.36 | A_52_P348638 | NM_017398 |
| cytochrome P450, family 2,<br>subfamily j, polypeptide 5                 | Cyp2j5                | -1.64 | 0.36 | A_52_P315766 | NM_010007 |
| proprotein convertase<br>subtilisin/kexin type 5                         | Pcsk5                 | -1.65 | 0.44 | A_52_P544043 | BC013068  |
| aconitase 1                                                              | Aco1                  | -1.65 | 0.36 | A_51_P391082 | NM_007386 |
| FAST kinase domains 5                                                    | Fastkd<br>5           | -1.65 | 0.35 | A_51_P448866 | NM_198176 |
| olfactory receptor 120                                                   | Olfr12<br>0           | -1.65 | 0.36 | A_51_P360658 | NM_146631 |
| RNA pseudouridylate<br>synthase domain containing 3                      | Rpusd<br>3            | -1.65 | 0.44 | A_52_P411507 | AK076749  |
| RIKEN cDNA 1110033M05<br>gene                                            | 11100<br>33M05<br>Rik | -1.65 | 0.40 | A_52_P9289   | AK166285  |
| regulation of nuclear pre-<br>mRNA domain containing<br>1A               | BC021<br>395          | -1.65 | 0.55 | A_51_P375406 | NM_144861 |
| proteasome (prosome,<br>macropain) activator subunit<br>4                | Psmc4                 | -1.66 | 0.55 | A_52_P111438 | NM_134013 |
| RIKEN cDNA 1700012B07<br>gene                                            | 17000<br>12B07        | -1.66 | 0.92 | A_51_P287241 | BC048675  |

|                                                                                       | Rik    |       |      |              |             |
|---------------------------------------------------------------------------------------|--------|-------|------|--------------|-------------|
| component of oligomeric golgi complex 4                                               | Cog4   | -1.66 | 0.36 | A_52_P353322 | NM_133973   |
| exostoses (multiple) 1                                                                | Ext1   | -1.66 | 0.36 | A_51_P416689 | NM_010162   |
| PDZ and LIM domain 5                                                                  | Pdlim5 | -1.66 | 0.24 | A_52_P662600 | NM_019808   |
|                                                                                       | Tmem   |       |      |              |             |
| transmembrane protein 57                                                              | 57     | -1.66 | 0.36 | A_51_P342259 | NM_025382   |
|                                                                                       | 57305  |       |      |              |             |
|                                                                                       | 57B15  |       |      |              |             |
| ankyrin repeat domain 33B                                                             | Rik    | -1.67 | 0.67 | A_52_P463235 | NM_027496   |
| Kruppel-like factor 1 (erythroid)                                                     | Klf1   | -1.67 | 0.92 | A_51_P168630 | NM_010635   |
| EF-hand calcium binding domain 2                                                      | Efcab2 | -1.67 | 0.80 | A_52_P465986 | NM_026626   |
| pyrophosphatase (inorganic) 2                                                         | Ppa2   | -1.67 | 0.35 | A_52_P18972  | NM_146141   |
| synaptic nuclear envelope 2                                                           | Syne2  | -1.67 | 0.92 | A_52_P315022 | XM_917083   |
| tyrosine kinase 2                                                                     | Tyk2   | -1.68 | 0.67 | A_51_P466824 | NM_018793   |
| UBX domain protein 4                                                                  | Ubx2   | -1.68 | 0.36 | A_51_P184312 | NM_026390   |
| H2A histone family, member Y                                                          | H2afy  | -1.68 | 0.44 | A_52_P179238 | BC006955    |
|                                                                                       | A5300  |       |      |              |             |
| RIKEN cDNA A530082C11 gene                                                            | 82C11  |       |      |              |             |
|                                                                                       | Rik    | -1.68 | 0.36 | A_52_P119830 | NM_177186   |
| N-myristoyltransferase 1                                                              | Nmt1   | -1.68 | 0.67 | A_51_P180825 | NM_008707   |
| integrin alpha 2                                                                      | Itga2  | -1.69 | 0.40 | A_52_P612019 | NM_008396   |
| solute carrier family 25, member 45                                                   | AW49   |       |      |              |             |
|                                                                                       | 1445   | -1.70 | 0.36 | A_51_P349727 | NM_134154   |
| serine (or cysteine) peptidase inhibitor, clade B, member 1c                          | Serpin |       |      |              |             |
|                                                                                       | b1c    | -1.70 | 0.92 | A_51_P212057 | NM_173051   |
| lysophosphatidylglycerol acyltransferase 1                                            | Lpgat1 | -1.70 | 0.36 | A_51_P453351 | NM_172266   |
| Ndufab1 cytochrome P450, family 2, subfamily j, polypeptide 11                        | Cyp2j1 |       |      |              | NM_00100414 |
|                                                                                       | 1      | -1.71 | 0.36 | A_51_P423085 | 1           |
| receptor (TNFRSF)-interacting serine-threonine kinase 2                               | Ripk2  | -1.71 | 0.36 | A_52_P179785 | NM_138952   |
| peroxiredoxin 6, related sequence 2                                                   | Prdx6- |       |      |              | XM_00100080 |
|                                                                                       | rs2    | -1.71 | 0.36 | A_52_P467930 | 2           |
| interferon regulatory factor 2                                                        | Irf2   | -1.71 | 0.23 | A_51_P316523 | NM_008391   |
| regulatory solute carrier protein, family 1, member 1; DNA-damage inducible protein 2 | Ddi2   | -1.71 | 0.36 | A_51_P152115 | AK018643    |
| monocyte to macrophage differentiation-associated 2                                   | Mmd2   | -1.72 | 0.36 | A_51_P257885 | NM_175217   |
| regulatory factor X, 4 (influences HLA class II expression)                           | Rfx4   | -1.72 | 0.44 | A_51_P496309 | NM_00102491 |
|                                                                                       |        |       |      |              | 8           |

|                                                                                     |                 |       |      |              |               |
|-------------------------------------------------------------------------------------|-----------------|-------|------|--------------|---------------|
| exosome component 7                                                                 | Exosc7          | -1.73 | 0.67 | A_51_P381784 | BC094932      |
| RAB GTPase activating protein 1-like                                                | Rabga p11       | -1.73 | 0.00 | A_52_P158122 | NM_013862     |
| ubiquitin protein ligase E3 component n-recognin 2                                  | Ubr2            | -1.73 | 0.36 | A_52_P387502 | NM_146078     |
| ADP-ribosylation factor guanine nucleotide-exchange factor 1(brefeldin A-inhibited) | Arfgef 1        | -1.73 | 0.36 | A_52_P513439 | XM_975420     |
| aldehyde oxidase 1                                                                  | Aox1            | -1.73 | 0.36 | A_51_P333111 | NM_009676     |
| F-box protein 3                                                                     | Fbxo3           | -1.73 | 0.36 | A_52_P113350 | NM_212433     |
| tocopherol (alpha) transfer protein                                                 | Ttpa 26105      | -1.73 | 0.00 | A_52_P29610  | NM_015767     |
| RIKEN cDNA 2610507B11 gene                                                          | 07B11 Rik 31100 | -1.74 | 0.44 | A_51_P244543 | NM_00100200 4 |
| RIKEN cDNA 3110049J23 gene                                                          | 49J23 Rik       | -1.74 | 0.23 | A_51_P165451 | NM_026085     |
| AHNAK nucleoprotein (desmoyokin)                                                    | Ahnak           | -1.75 | 0.55 | A_52_P496566 | NM_00103995 9 |
| ethanolamine kinase 1                                                               | Etnk1           | -1.75 | 0.36 | A_52_P424640 | AK044502      |
| acyl-Coenzyme A dehydrogenase family, member 10                                     | Acad1 0 93301   | -1.76 | 0.55 | A_51_P187507 | NM_028037     |
| RIKEN cDNA 9330182L06 gene                                                          | 82L06 Rik       | -1.76 | 0.36 | A_52_P134642 | NM_172706     |
| S phase cyclin A-associated protein in the ER                                       | Zfp291          | -1.76 | 0.44 | A_52_P373205 | AK173175      |
| ankyrin repeat and sterile alpha motif domain containing 4B                         | Anks4 b         | -1.76 | 0.55 | A_51_P318618 | NM_028085     |
| phospholipase C, beta 1                                                             | Plcb1           | -1.77 | 0.92 | A_52_P18262  | BC058710      |
| programmed cell death 4                                                             | Pdcd4 28104     | -1.78 | 0.92 | A_51_P261428 | NM_011050     |
| RIKEN cDNA 2810474O19 gene                                                          | 74O19 Rik       | -1.78 | 0.36 | A_52_P437860 | NM_026054     |
| hexamethylene bis-acetamide inducible 1                                             | Hexim 1 17000   | -1.78 | 0.80 | A_51_P348397 | NM_138753     |
| RIKEN cDNA 1700028E10 gene                                                          | 28E10 Rik       | -1.78 | 0.55 | A_52_P643893 | AK006454      |
| biotinidase                                                                         | Btd 17000       | -1.79 | 0.92 | A_51_P196158 | NM_025295     |
| potassium channel, subfamily K, member 10                                           | 24D23 Rik       | -1.79 | 0.44 | A_52_P483391 | NM_029911     |
| sparc/osteonectin, cwcv and kazal-like domains proteoglycan 2                       | Spock 2         | -1.79 | 0.67 | A_52_P393181 | NM_052994     |
| UDP glucuronosyltransferase                                                         | Ugt2b           | -1.79 | 0.40 | A_51_P102438 | NM_053215     |

|                                                                                                                                                             |            |       |      |              |             |   |
|-------------------------------------------------------------------------------------------------------------------------------------------------------------|------------|-------|------|--------------|-------------|---|
| 2 family, polypeptide B37 lectin, galactose binding, soluble 8                                                                                              | 37         |       |      |              |             |   |
| solute carrier organic anion transporter family, member 1a5                                                                                                 | Lgals8     | -1.79 | 0.40 | A_51_P316981 | NM_018886   |   |
| similar to Adenosylhomocysteinase (S-adenosyl-L-homocysteine hydrolase) (AdoHcyase) (Liver copper-binding protein) (CUBP); S-adenosylhomocysteine hydrolase | Slco1a5    | -1.80 | 0.00 | A_52_P542496 | NM_130861   |   |
| similar to epithelial protein lost in neoplasm; LIM domain containing 2                                                                                     | Ahcy       | -1.80 | 0.67 | A_51_P473533 | BC015304    |   |
| RIKEN cDNA A330049M08 gene                                                                                                                                  | Limd2      | -1.80 | 0.00 | A_52_P78023  | NM_172397   |   |
| PTK2 protein tyrosine kinase 2 beta                                                                                                                         | A330049M08 |       |      |              |             |   |
| fer (fms/fps related) protein kinase, testis specific 2                                                                                                     | Rik        | -1.80 | 0.67 | A_51_P496795 | NM_145555   |   |
| SWI/SNF related, matrix associated, actin dependent regulator of chromatin, subfamily a, member 2                                                           | Ptk2b      | -1.80 | 0.35 | A_52_P684647 | NM_172498   |   |
| desmoglein 1 alpha                                                                                                                                          | Fert2      | -1.80 | 0.55 | A_52_P405340 | NM_00103799 | 7 |
| retinoblastoma binding protein 4                                                                                                                            | Smarca2    | -1.80 | 0.35 | A_51_P450052 | NM_026003   |   |
| ubiquitin-associated protein 1                                                                                                                              | Dsg1a      | -1.80 | 0.80 | A_52_P475111 | XM_484705   |   |
| centrosomal protein 110                                                                                                                                     | Rbbp4      | -1.81 | 0.00 | A_52_P296810 | NM_009030   |   |
| brain and reproductive organ-expressed protein                                                                                                              | Ubap1      | -1.81 | 0.36 | A_51_P480062 | NM_023305   |   |
| autophagy-related 3 (yeast)                                                                                                                                 | Cep110     | -1.81 | 0.67 | A_51_P234907 | BC079536    |   |
| interleukin 1 receptor accessory protein                                                                                                                    | Bre        | -1.81 | 0.36 | A_51_P197365 | NM_181279   |   |
| protein phosphatase 1, regulatory (inhibitor) subunit 9A                                                                                                    | Atg3       | -1.82 | 0.40 | A_52_P464003 | NM_026402   |   |
| leucine-rich repeat, immunoglobulin-like and transmembrane domains 1                                                                                        | Il1rap     | -1.82 | 0.67 | A_52_P467232 | NM_134103   |   |
| tau tubulin kinase 2; congenital dyserythropoietic anemia, type I (human)                                                                                   | Ppp1r9a    | -1.82 | 0.55 | A_52_P159490 | NM_181595   |   |
| complement component 4 binding protein                                                                                                                      | Lrrc21     | -1.82 | 0.92 | A_51_P145020 | NM_146245   |   |
| X-linked inhibitor of                                                                                                                                       | Ttbk2      | -1.82 | 0.40 | A_51_P184398 | NM_00102485 | 6 |
|                                                                                                                                                             | C4bp       | -1.83 | 0.36 | A_52_P60194  | NM_007576   |   |
|                                                                                                                                                             | Birc4      | -1.83 | 0.00 | A_51_P424893 | NM_009688   |   |

|                                                                                                                            |                       |       |      |              |                  |
|----------------------------------------------------------------------------------------------------------------------------|-----------------------|-------|------|--------------|------------------|
| apoptosis<br>RIKEN cDNA 9630025F12<br>gene; protein kinase C,<br>epsilon                                                   | Prkce                 | -1.83 | 0.44 | A_52_P375455 | NM_011104        |
| forkhead-associated (FHA)<br>phosphopeptide binding<br>domain 1                                                            | Fhad1                 | -1.83 | 0.92 | A_52_P675039 | NM_028429        |
| coagulation factor XI                                                                                                      | F11<br>49334          | -1.84 | 0.36 | A_51_P502119 | NM_028066        |
| RIKEN cDNA 4933438K21<br>gene                                                                                              | 38K21<br>Rik          | -1.84 | 0.36 | A_51_P299709 | AK017111         |
| D-aspartate oxidase                                                                                                        | Ddo                   | -1.84 | 0.00 | A_52_P448335 | AK019898         |
| Dmx-like 2                                                                                                                 | Dmx12                 | -1.84 | 0.92 | A_51_P141660 | XM_358382        |
| methyl-CpG binding domain<br>protein 1                                                                                     | Mbd1                  | -1.84 | 0.44 | A_52_P158923 | NM_013594        |
| GTP-binding protein 10<br>(putative); predicted gene<br>6877                                                               | BC034<br>507          | -1.84 | 0.36 | A_52_P646542 | NM_153116        |
| hook homolog 3 ( <i>Drosophila</i> )                                                                                       | Hook3                 | -1.84 | 0.23 | A_52_P247513 | NM_207659        |
| mitogen-activated protein<br>kinase kinase 3                                                                               | Map2k<br>3            | -1.85 | 0.24 | A_51_P272817 | NM_008928        |
| chemokine (C-C motif)<br>ligand 25                                                                                         | Ccl25                 | -1.86 | 0.36 | A_52_P326713 | NM_009138        |
| DNA segment, Chr 14,<br>Abbott 1 expressed                                                                                 | D14Ab<br>b1e<br>23100 | -1.86 | 0.92 | A_52_P182749 | XM_897688        |
| RIKEN cDNA 2310044G17<br>gene                                                                                              | 44G17<br>Rik          | -1.86 | 0.44 | A_52_P366772 | NM_173735        |
| ATP-binding cassette, sub-<br>family B (MDR/TAP),<br>member 10; similar to ABC<br>transporter                              | Abcb1<br>0            | -1.86 | 0.80 | A_51_P144696 | NM_019552        |
| dopa decarboxylase                                                                                                         | Ddc                   | -1.86 | 0.36 | A_52_P63905  | NM_016672        |
| cytochrome P450, family 4,<br>subfamily v, polypeptide 3                                                                   | Cyp4v<br>3            | -1.87 | 0.36 | A_52_P302345 | NM_133969        |
| sulfiredoxin 1 homolog ( <i>S.</i><br><i>cerevisiae</i> )                                                                  | Srxn1                 | -1.87 | 0.67 | A_51_P330125 | NM_029688        |
| endonuclease G                                                                                                             | Endog<br>49324        | -1.87 | 0.00 | A_51_P349073 | NM_007931        |
| regulatory associated protein<br>of MTOR, complex 1                                                                        | 17H02<br>Rik          | -1.87 | 0.40 | A_51_P413031 | NM_028898        |
| mitochondrial tumor<br>suppressor 1                                                                                        | Mtus1                 | -1.88 | 0.80 | A_52_P19159  | NM_00100586<br>5 |
| gamma-aminobutyric acid<br>(GABA) B receptor, 2;<br>similar to ortholog of human<br>G protein-coupled receptor<br>51 GPR51 | Gabbr<br>2            | -1.88 | 0.24 | A_52_P111145 | NM_00108114<br>1 |
| similar to modulator<br>recognition factor 2; AT rich<br>interactive domain 5B                                             | Arid5b                | -1.88 | 0.00 | A_52_P367621 | NM_023598        |

|                                                                                                           |                       |       |      |              |           |
|-----------------------------------------------------------------------------------------------------------|-----------------------|-------|------|--------------|-----------|
| (MRF1-like)                                                                                               |                       |       |      |              |           |
| bromodomain containing 4                                                                                  | Brd4                  | -1.89 | 0.36 | A_52_P494230 | NM_020508 |
| chimerin (chimaerin) 2                                                                                    | Chn2                  | -1.89 | 0.40 | A_52_P302587 | NM_023543 |
| myelin basic protein                                                                                      | Mbp                   | -1.89 | 0.55 | A_52_P329451 | NM_010777 |
| insulin-like growth factor binding protein, acid labile subunit                                           | Igfals                | -1.89 | 0.44 | A_51_P277088 | NM_008340 |
| interferon (alpha and beta) receptor 2                                                                    | Ifnar2                | -1.89 | 0.44 | A_52_P190405 | NM_010509 |
| MYST histone acetyltransferase 1                                                                          | Myst1                 | -1.89 | 0.13 | A_51_P103757 | NM_026370 |
| F-box protein 3                                                                                           | Fbxo3                 | -1.90 | 0.36 | A_52_P412529 | NM_020593 |
| ATP-binding cassette, sub-family G (WHITE), member 2                                                      | Abcg2                 | -1.91 | 0.67 | A_51_P184886 | NM_011920 |
| breast carcinoma amplified sequence 3                                                                     | Bcas3                 | -1.91 | 0.36 | A_51_P433584 | NM_138681 |
| calcium/calmodulin-dependent protein kinase ID                                                            | Camk1d                | -1.91 | 0.67 | A_52_P131353 | NM_177343 |
| mannose-binding lectin (protein A) 1                                                                      | Mbl1                  | -1.92 | 0.23 | A_51_P373619 | NM_010775 |
| achaete-scute complex homolog 2 (Drosophila)                                                              | Ascl2                 | -1.92 | 0.24 | A_51_P469147 | NM_008554 |
| chitinase domain containing 1                                                                             | 31100<br>23E09<br>Rik | -1.92 | 0.55 | A_52_P18922  | NM_026522 |
| tec protein tyrosine kinase                                                                               | Tec                   | -1.92 | 0.36 | A_51_P467505 | NM_013689 |
| Ca <sup>2+</sup> -dependent activator protein for secretion 2                                             | Cadps2                | -1.93 | 0.36 | A_51_P233153 | NM_153163 |
| thyroid hormone receptor interactor 4                                                                     | Trip4                 | -1.93 | 0.36 | A_52_P390918 | NM_019797 |
| protein phosphatase 1 (formerly 2C)-like superkiller viralicidic activity 2-like ( <i>S. cerevisiae</i> ) | Ppm11                 | -1.93 | 0.36 | A_51_P413111 | AK147389  |
| integrator complex subunit 4                                                                              | Ints4                 | -1.93 | 0.80 | A_51_P121252 | NM_021337 |
| IQ motif and ubiquitin domain containing; similar to IQ and ubiquitin-like domain-containing protein      | 49324<br>08B21        |       |      |              |           |
| FLJ35834 homolog                                                                                          | Rik                   | -1.93 | 0.36 | A_52_P512137 | NM_172535 |
| serine (or cysteine) peptidase inhibitor, clade B, member 9c                                              | Serpinb9c             | -1.93 | 0.00 | A_51_P483499 | NM_011453 |
| GTP cyclohydrolase 1                                                                                      | Gch1                  | -1.94 | 0.23 | A_51_P297579 | NM_008102 |
| syntaxin 8                                                                                                | Stx8                  | -1.94 | 0.23 | A_52_P603654 | NM_018768 |
| expressed sequence AI317395                                                                               | AI317395              | -1.94 | 0.80 | A_51_P436469 | NM_144821 |
| cut-like homeobox 1                                                                                       | Cutl1                 | -1.94 | 0.36 | A_52_P567658 | NM_198602 |
| transformation related protein 53 inducible nuclear protein                                               | Trp53inp2             | -1.96 | 0.36 | A_51_P228354 | NM_178111 |



|                                                                                                     |          |       |      |              |           |             |
|-----------------------------------------------------------------------------------------------------|----------|-------|------|--------------|-----------|-------------|
| 2                                                                                                   |          |       |      |              |           |             |
| adaptor-related protein complex 3, delta 1 subunit                                                  | Ap3d1    | -1.96 | 0.23 | A_51_P413710 | NM_007460 |             |
| collagen, type XXVII, alpha 1                                                                       | Col27a1  | -1.96 | 0.92 | A_52_P480088 | AK003879  |             |
| ariadne homolog 2 (Drosophila); predicted gene 12263                                                | Arih2    | -1.97 | 0.35 | A_52_P669843 | NM_011790 |             |
| methionine sulfoxide reductase A                                                                    | Msra     | -1.97 | 0.36 | A_51_P299243 | NM_026322 |             |
| 5',3'-nucleotidase, mitochondrial                                                                   | Nt5m     | -1.97 | 0.36 | A_51_P344046 | NM_134029 |             |
| leucine rich repeat containing 16A                                                                  | Lrrc16   | -1.98 | 0.44 | A_52_P474719 | NM_026825 |             |
| natriuretic peptide receptor 3                                                                      | Npr3     | -1.99 | 0.36 | A_51_P247184 | NM_008728 |             |
| germ cell-specific gene 1                                                                           | Gsg1     | -1.99 | 0.80 | A_51_P346252 | NM_010352 | NM_00100179 |
| ATPase, class VI, type 11C                                                                          | Atp11c   | -2.00 | 0.36 | A_51_P215815 | 8         |             |
| protein phosphatase 1, regulatory (inhibitor) subunit 3B                                            | Ppp1r3b  | -2.00 | 0.36 | A_51_P138933 | NM_177741 |             |
| SET binding factor 2                                                                                | Sbf2     | -2.00 | 0.23 | A_52_P371401 | BC067204  |             |
| glycine-N-acyltransferase                                                                           | Glyat    | -2.01 | 0.00 | A_51_P318856 | NM_145935 |             |
| transmembrane protein 70                                                                            | Tmem70   | -2.01 | 0.00 | A_51_P259415 | NM_027415 |             |
| C-reactive protein, pentraxin-related                                                               | Crp      | -2.01 | 0.36 | A_51_P105554 | NM_007768 |             |
| olfactory receptor 144                                                                              | Olf144   | -2.01 | 0.36 | A_51_P105554 | NM_007768 |             |
| homer homolog 2 (Drosophila)                                                                        | Homer2   | -2.02 | 0.55 | A_51_P436790 | NM_207665 |             |
| angiogenin, ribonuclease A family, member 2                                                         | Ang2     | -2.02 | 0.36 | A_52_P176573 | NM_011983 |             |
| similar to cytochrome b5 outer mitochondrial membrane precursor; cytochrome b5 type B               | Cyb5b    | -2.03 | 0.00 | A_51_P349888 | NM_007449 |             |
| CD99 antigen-like 2                                                                                 | Cd99l2   | -2.04 | 0.67 | A_51_P336827 | NM_025558 |             |
| alcohol dehydrogenase 6 (class V), pseudogene 1                                                     | Adh6-ps1 | -2.04 | 0.36 | A_52_P601385 | NM_138309 |             |
| fetuin beta                                                                                         | Fetub    | -2.04 | 0.55 | A_51_P120027 | AK004863  |             |
| SMAD specific E3 ubiquitin protein ligase 2; similar to SMAD specific E3 ubiquitin protein ligase 2 | Smurf2   | -2.04 | 0.24 | A_51_P353494 | NM_021564 |             |
| von Willebrand factor A domain containing 5B1                                                       | Vwf5b1   | -2.04 | 0.36 | A_52_P576886 | NM_025481 |             |
| vesicle transport through interaction with t-SNAREs homolog 1A (yeast)                              | Rik      | -2.04 | 0.55 | A_51_P104409 | XM_144060 |             |
|                                                                                                     | Vti1a    | -2.05 | 0.23 | A_52_P361664 | NM_016862 |             |

|                                                                                                 |            |       |      |              |              |
|-------------------------------------------------------------------------------------------------|------------|-------|------|--------------|--------------|
| attractin like 1                                                                                | Atrn1      | -2.05 | 0.44 | A_52_P584293 | NM_181415    |
| natriuretic peptide precursor type B                                                            | Nppb       | -2.05 | 0.36 | A_51_P426195 | NM_008726    |
| coiled-coil domain containing 17                                                                | LOC622665  | -2.05 | 0.36 | A_51_P426724 | NM_001037916 |
| phosphodiesterase 8A; similar to cAMP-specific cyclic nucleotide phosphodiesterase PDE8; MMPDE8 | Pde8a      | -2.05 | 0.23 | A_52_P391000 | NM_008803    |
| similar to Nedd4 binding protein 2; NEDD4 binding protein 2                                     | B3bp       | -2.05 | 0.00 | A_52_P573174 | NM_001024917 |
| fat storage-inducing transmembrane protein 1                                                    | 28A07      |       |      |              |              |
| phosphatidylinositol glycan anchor biosynthesis, class U                                        | Rik        | -2.06 | 0.92 | A_51_P164630 | NM_026808    |
| solute carrier family 17 (sodium-dependent inorganic phosphate cotransporter), member 8         | Cdc911     |       |      |              | NM_00100472  |
| forkhead box N3                                                                                 | 1          | -2.07 | 0.00 | A_52_P222709 | 1            |
| dymeclin                                                                                        | Slc17a8    | -2.07 | 0.40 | A_52_P163021 | NM_182959    |
| gephyrin                                                                                        | Ches1      | -2.07 | 0.36 | A_51_P367136 | BC029185     |
| RIKEN cDNA A730011L01 gene                                                                      | Dym        | -2.07 | 0.36 | A_51_P272586 | NM_027727    |
| SET binding factor 2                                                                            | Gphn       | -2.07 | 0.36 | A_52_P551594 | NM_172952    |
| arylformamidase                                                                                 | A730011L01 |       |      |              |              |
| RIKEN cDNA 4933407N01 gene                                                                      | Rik        | -2.08 | 0.92 | A_51_P361242 | NM_177394    |
| kyphoscoliosis peptidase                                                                        | Sbf2       | -2.08 | 0.55 | A_51_P250590 | AK080963     |
| angiogenin, ribonuclease A family, member 4                                                     | Afmid      | -2.09 | 0.92 | A_52_P219904 | NM_027827    |
| RIKEN cDNA 1110020G09 gene                                                                      | 07N01      |       |      |              |              |
| protein tyrosine phosphatase, receptor type, D                                                  | Rik        | -2.09 | 0.92 | A_52_P508317 | AK162571     |
| nuclear factor of activated T-cells, cytoplasmic, calcineurin-dependent 2                       | Ky         | -2.09 | 0.36 | A_52_P561272 | NM_024291    |
| similar to NFIL3/E4BP4 transcription factor; nuclear factor, interleukin 3, regulated           | Ang4       | -2.09 | 0.23 | A_51_P502906 | NM_177544    |
| T-cell immunoglobulin and mucin domain containing 4                                             | 11100      |       |      |              |              |
| RIKEN cDNA 9130016M20                                                                           | 20G09      |       |      |              |              |
|                                                                                                 | Rik        | -2.10 | 0.55 | A_52_P374274 | AK046666     |
|                                                                                                 | Ptprd      | -2.10 | 0.36 | A_51_P468231 | NM_011211    |
|                                                                                                 | Nfatc2     | -2.11 | 0.67 | A_52_P628171 | NM_010899    |
|                                                                                                 | Nfil3      | -2.12 | 0.36 | A_51_P111492 | NM_017373    |
|                                                                                                 | Timd4      | -2.12 | 0.36 | A_52_P609868 | NM_178759    |
|                                                                                                 | 91300      | -2.13 | 0.44 | A_52_P303754 | AK050221     |

|                                                                                                         |                       |       |      |               |                              |
|---------------------------------------------------------------------------------------------------------|-----------------------|-------|------|---------------|------------------------------|
| gene                                                                                                    | 16M20<br>Rik          |       |      |               |                              |
| nardilysin, N-arginine dibasic<br>convertase, NRD convertase<br>1                                       | Nrd1                  | -2.13 | 0.00 | A_52_P51783   | NM_146150                    |
| pyruvate dehydrogenase<br>kinase, isoenzyme 1                                                           | Pdk1                  | -2.15 | 0.00 | A_51_P406429  | NM_172665                    |
| endothelin converting<br>enzyme 2                                                                       | Ece2                  | -2.15 | 0.40 | A_52_P271572  | NM_139293                    |
| zinc finger and BTB domain<br>containing 20                                                             | Zbtb20                | -2.15 | 0.24 | A_52_P279651  | NM_019778                    |
| conserved helix-loop-helix<br>ubiquitous kinase                                                         | Chuk<br>49304         | -2.16 | 0.36 | A_52_P386468  | NM_007700                    |
| RIKEN cDNA 4930404H11<br>gene                                                                           | 04H11<br>Rik          | -2.16 | 0.36 | A_52_P1179483 | AK015079<br>NM_00103935<br>4 |
| lin-7 homolog A (C. elegans)<br>tankyrase, TRF1-interacting<br>ankyrin-related ADP-ribose<br>polymerase | Lin7a<br>Tnks         | -2.16 | 0.92 | A_52_P48762   | AK083986                     |
| cleavage and polyadenylation<br>specific factor 4-like                                                  | D11Ert<br>d636e       | -2.18 | 0.00 | A_51_P377557  | NM_029794                    |
| RIKEN cDNA 5033411D12<br>gene                                                                           | AF397<br>014          | -2.18 | 0.36 | A_51_P397200  | NM_138654                    |
| hydroxy-delta-5-steroid<br>dehydrogenase, 3 beta- and<br>steroid delta-isomerase 3                      | Hsd3b<br>3            | -2.18 | 0.36 | A_52_P459818  | NM_00101230<br>6             |
| transient receptor potential<br>cation channel, subfamily M,<br>member 2                                | Trpm2<br>BC015        | -2.20 | 0.44 | A_52_P676635  | NM_138301                    |
| cDNA sequence BC015286<br>predicted gene 7208;                                                          | 286                   | -2.20 | 0.92 | A_51_P436567  | NM_198171                    |
| carboxylesterase 6                                                                                      | Ces6                  | -2.20 | 0.00 | A_51_P443339  | NM_133960                    |
| Rap guanine nucleotide<br>exchange factor (GEF) 4                                                       | Rapgef<br>4           | -2.21 | 0.55 | A_51_P285916  | NM_019688                    |
| ubiquitin associated domain<br>containing 2                                                             | Phgdhl<br>1           | -2.21 | 0.67 | A_52_P82229   | NM_026861<br>NM_00101358     |
| par-3 (partitioning defective<br>3) homolog (C. elegans)                                                | Pard3                 | -2.21 | 0.00 | A_52_P224323  | 1                            |
| cytochrome P450, family 2,<br>subfamily c, polypeptide 39                                               | Cyp2c<br>39           | -2.22 | 0.92 | A_51_P304109  | NM_010003                    |
|                                                                                                         | 30214<br>01C12        |       |      |               |                              |
| ankyrin repeat domain 33B<br>prior incubation determinant<br>1; RIKEN cDNA                              | Rik<br>50334<br>14K04 | -2.22 | 0.36 | A_52_P92121   | AK053456<br>NM_00100394      |
| 5033414K04 gene                                                                                         | Rik                   | -2.22 | 0.67 | A_52_P269158  | 8                            |
| RIKEN cDNA 4930528F23<br>gene                                                                           | 49305<br>28F23        | -2.23 | 0.92 | A_51_P510640  | AK015924                     |

|                                                                                                            |                       |       |      |              |             |
|------------------------------------------------------------------------------------------------------------|-----------------------|-------|------|--------------|-------------|
| proline dehydrogenase                                                                                      | Rik<br>Prodh<br>48334 | -2.23 | 0.24 | A_51_P215438 | NM_011172   |
| RIKEN cDNA 4833442J19<br>gene                                                                              | 42J19<br>Rik          | -2.23 | 0.36 | A_52_P263673 | NM_177101   |
| McKusick-Kaufman<br>syndrome protein                                                                       | Mkks                  | -2.23 | 0.80 | A_52_P541939 | NM_021527   |
| coiled-coil domain<br>containing 21                                                                        | Ccdc2<br>1            | -2.24 | 0.35 | A_51_P379208 | NM_144527   |
| solute carrier family 1 (glial<br>high affinity glutamate<br>transporter), member 2                        | Slc1a2                | -2.24 | 0.00 | A_52_P168496 | NM_011393   |
| coronin 7                                                                                                  | Coro7                 | -2.24 | 0.23 | A_51_P323878 | NM_030205   |
| synaptotagmin I                                                                                            | Syt1                  | -2.24 | 0.36 | A_51_P297900 | NM_009306   |
| cytochrome P450, family 2,<br>subfamily d, polypeptide 13                                                  | Cyp2d<br>13           | -2.25 | 0.36 | A_52_P372062 | AK004933    |
| dipeptidylpeptidase 4                                                                                      | Dpp4                  | -2.25 | 0.13 | A_52_P443578 | NM_010074   |
| TBC1 domain family,<br>member 9B                                                                           | Tbc1d<br>9b           | -2.25 | 0.00 | A_51_P354461 | BC065080    |
| D-aspartate oxidase                                                                                        | Ddo                   | -2.26 | 0.00 | A_51_P384936 | NM_027442   |
| 6-phosphofructo-2-<br>kinase/fructose-2,6-<br>biphosphatase 3                                              | Pfkfb3                | -2.26 | 0.36 | A_52_P362917 | NM_133232   |
| myosin VB                                                                                                  | Myo5b                 | -2.27 | 0.36 | A_52_P408914 | NM_201600   |
| forkhead box N3                                                                                            | Ches1                 | -2.27 | 0.36 | A_51_P172344 | NM_183186   |
| heat shock protein, alpha-<br>crystallin-related, B6                                                       | Hspb6                 | -2.30 | 0.36 | A_51_P322022 | NM_00101240 |
| hairy and enhancer of split 6<br>(Drosophila)                                                              | Hes6                  | -2.32 | 0.00 | A_51_P429366 | 1           |
| SWI/SNF related, matrix<br>associated, actin dependent<br>regulator of chromatin,<br>subfamily a, member 2 | Smarc<br>a2           | -2.33 | 0.36 | A_51_P504037 | NM_011416   |
| Musashi homolog 2<br>(Drosophila)                                                                          | Msi2<br>18100         | -2.33 | 0.24 | A_52_P780821 | NM_054043   |
| RIKEN cDNA 1810011O10<br>gene                                                                              | 11O10<br>Rik          | -2.33 | 0.80 | A_51_P112308 | NM_026931   |
| membrane associated<br>guanylate kinase, WW and<br>PDZ domain containing 1                                 | Magi1                 | -2.33 | 0.36 | A_51_P406346 | NM_010367   |
| aminolevulinic acid synthase<br>2, erythroid                                                               | Alas2                 | -2.34 | 0.36 | A_51_P327451 | NM_009653   |
| angiogenin, ribonuclease A<br>family, member 3;                                                            |                       |       |      |              |             |
| angiogenin, ribonuclease A<br>family, member 5                                                             | Ang3                  | -2.35 | 0.00 | A_51_P179504 | U72672      |
| solute carrier family 10<br>(sodium/bile acid<br>cotransporter family),<br>member 1                        | Slc10a<br>1           | -2.36 | 0.40 | A_52_P69109  | NM_011387   |

|                                                                                                |                   |       |      |              |                 |
|------------------------------------------------------------------------------------------------|-------------------|-------|------|--------------|-----------------|
| RIKEN cDNA 2210408F21 gene                                                                     | 2210408F21<br>Rik | -2.36 | 0.00 | A_51_P436610 | XM_895387       |
| kynurenine 3-monooxygenase (kynurenine 3-hydroxylase)                                          | Kmo               | -2.37 | 0.00 | A_51_P493302 | NM_133809       |
| serine (or cysteine) peptidase inhibitor, clade E, member 2                                    | Serpine2          | -2.37 | 0.36 | A_51_P268094 | NM_009255       |
| <u>metastasis associated lung adenocarcinoma transcript 1 (non-coding RNA)</u>                 | Malat1            | -2.37 | 0.13 | A_51_P377045 | <u>AK090111</u> |
| serine/threonine kinase 40                                                                     | Stk40             | -2.38 | 0.13 | A_51_P363657 | NM_028800       |
| kininogen 2                                                                                    | Kng2              | -2.38 | 0.00 | A_52_P305539 | NM_201375       |
| DIP2 disco-interacting protein 2 homolog C (Drosophila)                                        | Dip2c             | -2.39 | 0.00 | A_51_P216516 | AK013596        |
| phospholipase C, beta 1                                                                        | Plcb1             | -2.40 | 0.00 | A_52_P351574 | NM_019677       |
| dihydropyrimidine dehydrogenase                                                                | Dpyd              | -2.41 | 0.13 | A_51_P473259 | NM_170778       |
| natriuretic peptide receptor 2                                                                 | Npr2              | -2.41 | 0.23 | A_51_P518940 | NM_173788       |
| Purkinje cell protein 4-like 1                                                                 | Pcp4l1            | -2.42 | 0.40 | A_51_P361150 | AK002772        |
| glycine-N-acyltransferase                                                                      | Glyat             | -2.43 | 0.55 | A_52_P506984 | BC015294        |
| HOP homeobox                                                                                   | Hod               | -2.43 | 0.13 | A_52_P512575 | NM_175606       |
| protein kinase C, zeta                                                                         | Prkcz             | -2.44 | 0.00 | A_52_P438084 | NM_008860       |
| sorcini                                                                                        | Sri               | -2.45 | 0.00 | A_51_P489313 | NM_025618       |
| protein kinase D3                                                                              | Prkcn             | -2.46 | 0.13 | A_52_P94495  | AK050059        |
| guanine nucleotide binding protein, alpha 14                                                   | Gna14             | -2.47 | 0.44 | A_51_P110323 | NM_008137       |
| fat mass and obesity associated                                                                | Fto               | -2.47 | 0.00 | A_52_P509188 | AK129437        |
| cytochrome P450, family 2, subfamily c, polypeptide 40; similar to RIKEN cDNA C730004C24 gene; |                   |       |      |              |                 |
| cytochrome P450, family 2, subfamily c, polypeptide 69;                                        |                   |       |      |              |                 |
| cytochrome P450, family 2, subfamily c, polypeptide 67                                         | Cyp2c40           | -2.47 | 0.00 | A_52_P200121 | NM_010004       |
| cullin 3                                                                                       | Cul3              | -2.47 | 0.24 | A_52_P47645  | NM_016716       |
| NLR family, pyrin domain containing 6                                                          | Nalp6             | -2.50 | 0.23 | A_52_P98531  | BC031139        |
| SET binding factor 2                                                                           | Sbf2              | -2.50 | 0.00 | A_52_P660745 | BC015069        |
| trafficking protein, kinesin binding 1                                                         | Trak1<br>D9300    | -2.50 | 0.36 | A_52_P458536 | NM_175114       |
| MACRO domain containing 1                                                                      | 10J01<br>Rik      | -2.51 | 0.24 | A_52_P559957 | NM_134147       |
| hairy and enhancer of split 2 (Drosophila)                                                     | Hes2              | -2.51 | 0.35 | A_51_P303308 | NM_008236       |
| cytochrome P450, family 4,                                                                     | Cyp4f             | -2.54 | 0.13 | A_51_P210603 | NM_130882       |

|                                                                                                                    |                       |                |      |                              |                        |
|--------------------------------------------------------------------------------------------------------------------|-----------------------|----------------|------|------------------------------|------------------------|
| subfamily f, polypeptide 13<br>tankyrase, TRF1-interacting<br>ankyrin-related ADP-ribose<br>polymerase             | 13<br>Tnks<br>06100   | -2.55          | 0.00 | A_52_P127024                 | NM_175091              |
| RIKEN cDNA 0610012H03<br>gene                                                                                      | 12H03<br>Rik          | -2.57          | 0.00 | A_51_P378622                 | NM_028747              |
| protein tyrosine phosphatase,<br>receptor type, G; similar to<br>protein tyrosine phosphatase,<br>receptor type, G | Ptprg                 | -2.58          | 0.00 | A_51_P103114                 | NM_008981              |
| insulin induced gene 1                                                                                             | Insig1                | -2.58          | 0.67 | A_51_P290207                 | NM_153526              |
| folate receptor 2 (fetal)                                                                                          | Folr2                 | -2.59          | 0.36 | A_51_P162671                 | NM_008035              |
| esterase 22                                                                                                        | Es22                  | -2.60          | 0.23 | A_51_P369784                 | NM_133660              |
| predicted gene 11225; 3-<br>hydroxyisobutyrate<br>dehydrogenase                                                    | Hibadh                | -2.60          | 0.00 | A_51_P165165                 | NM_145567              |
| neuropilin 1                                                                                                       | Nrp1                  | -2.61          | 0.44 | A_52_P371237                 | NM_008737              |
| vacuolar protein sorting 41<br>(yeast)                                                                             | Vps41                 | -2.64          | 0.00 | A_51_P412338                 | NM_172120              |
| cytochrome P450, family 27,<br>subfamily a, polypeptide 1                                                          | Cyp27<br>a1           | -2.65          | 0.36 | A_51_P112817                 | NM_024264              |
| nebulin                                                                                                            | Neb                   | -2.65          | 0.36 | A_51_P218535                 | XM_130232              |
| epidermal growth factor<br>receptor                                                                                | Egfr                  | -2.65          | 0.36 | A_52_P175190                 | AK033431               |
| spermidine/spermine N1-<br>acetyl transferase-like 1                                                               | Sat11                 | -2.67          | 0.36 | A_51_P288608                 | AK015086               |
| high density lipoprotein<br>(HDL) binding protein                                                                  | Hdlbp                 | -2.67          | 0.36 | A_52_P36586                  | NM_133808              |
| N-acylsphingosine<br>amidohydrolase 1                                                                              | Asah1                 | -2.68          | 0.23 | A_51_P509098                 | NM_019734              |
| neurexin I                                                                                                         | Nrxn1                 | -2.70          | 0.55 | A_51_P229547                 | AB093249               |
| deiodinase, iodothyronine,<br>type I; similar to Dio1<br>protein                                                   | Dio1                  | -2.70          | 0.35 | A_51_P403477                 | NM_007860              |
| leucine-rich repeats and<br>transmembrane domains 1                                                                | Lrtm1                 | -2.72          | 0.36 | A_51_P326685                 | NM_176920              |
| bromodomain containing 4<br>protein phosphatase 1<br>(formerly 2C)-like                                            | Brd4<br>Ppm11         | -2.72<br>-2.73 | 0.00 | A_52_P142965<br>A_51_P212515 | NM_198094<br>NM_178726 |
| potassium channel, subfamily<br>K, member 5                                                                        | Kcnk5                 | -2.75          | 0.36 | A_51_P267861                 | NM_021542              |
| solute carrier family 2<br>(facilitated glucose<br>transporter), member 5                                          | Slc2a5<br>Prnpip<br>1 | -2.76<br>-2.77 | 0.36 | A_51_P514405<br>A_52_P616591 | NM_019741<br>NM_080469 |
| exoribonuclease 3                                                                                                  |                       |                |      |                              |                        |
| UDP glycosyltransferases 3<br>family, polypeptide A2                                                               | Ugt3a2                | -2.78          | 0.36 | A_52_P557240                 | NM_144845              |
| RIKEN cDNA 4933407N01<br>gene                                                                                      | 49334<br>07N01        | -2.79          | 0.00 | A_51_P232771                 | NM_025745              |

|                                                                                                                                                    | Rik                        |                |              |                              |                                 |  |
|----------------------------------------------------------------------------------------------------------------------------------------------------|----------------------------|----------------|--------------|------------------------------|---------------------------------|--|
| cytidine monophospho-N-acetylneuraminic acid hydroxylase                                                                                           | Cmah                       | -2.80          | 0.36         | A_51_P172917                 | NM_007717                       |  |
| ornithine aminotransferase                                                                                                                         | Oat                        | -2.80          | 0.36         | A_51_P141535                 | NM_016978                       |  |
| transmembrane 7 superfamily member 2                                                                                                               | Tm7sf<br>2                 | -2.81          | 0.80         | A_52_P35064                  | NM_028454                       |  |
| pyruvate kinase liver and red blood cell                                                                                                           | Pklr<br>BC026              | -2.83          | 0.36         | A_51_P176042                 | NM_013631                       |  |
| carboxylesterase 8 (putative)                                                                                                                      | 374                        | -2.88          | 0.40         | A_51_P478881                 | NM_146213                       |  |
| SET binding factor 2                                                                                                                               | Sbf2                       | -2.90          | 0.00         | A_52_P676877                 | NM_177324                       |  |
| hydroxy-delta-5-steroid dehydrogenase, 3 beta- and steroid delta-isomerase 6                                                                       | Hsd3b<br>6<br>C2300        | -2.90          | 0.00         | A_52_P253567                 | NM_013821                       |  |
| indoleamine 2,3-dioxygenase 2                                                                                                                      | 43N17<br>Rik<br>LOC3       | -2.98          | 0.00         | A_51_P384515                 | AK082385<br>NM_00101377         |  |
| predicted gene 10319                                                                                                                               | 81806<br>Depdc             | -2.98          | 0.80         | A_52_P202367                 | 5                               |  |
| DEP domain containing 6                                                                                                                            | 6                          | -2.98          | 0.00         | A_51_P445841                 | NM_145470                       |  |
| DnaJ (Hsp40) homolog, subfamily C, member 1                                                                                                        | Dnajc1                     | -2.99          | 0.23         | A_51_P513041                 | AK014639                        |  |
| cytochrome P450, family 4, subfamily f, polypeptide 14 similar to cytochrome P450; CYP2C37; cytochrome P450, family 2, subfamily c, polypeptide 37 | Cyp4f<br>14<br>Cyp2c<br>37 | -2.99<br>-3.04 | 0.36<br>0.24 | A_51_P452768<br>A_51_P498882 | NM_022434<br>NM_010001          |  |
| cytochrome P450, family 2, subfamily c, polypeptide 44                                                                                             | Cyp2c<br>44                | -3.05          | 0.36         | A_51_P209782                 | NM_00100144<br>6<br>NM_00102461 |  |
| tsukushin                                                                                                                                          | Lrrc54<br>E1300            | -3.05          | 0.36         | A_51_P219483                 | 9                               |  |
| small nucleolar RNA host gene 11 (non-protein coding)                                                                                              | 13N09<br>Rik               | -3.10          | 0.00         | A_51_P267933                 | BC028327                        |  |
| epidermal growth factor receptor                                                                                                                   | Egfr                       | -3.11          | 0.36         | A_52_P106259                 | NM_207655                       |  |
| coronin 7                                                                                                                                          | Coro7                      | -3.13          | 0.00         | A_52_P287419                 | AK039585                        |  |
| F-box and leucine-rich repeat protein 17                                                                                                           | Fbx117                     | -3.13          | 0.00         | A_52_P268279                 | XM_925135                       |  |
| serine (or cysteine) peptidase inhibitor, clade A (alpha-1 antiproteinase, antitrypsin), member 11                                                 | Serpin<br>a11<br>Tspan3    | -3.13          | 0.36         | A_52_P423296                 | NM_199314                       |  |
| tetraspanin 33                                                                                                                                     | 3                          | -3.15          | 0.23         | A_51_P367240                 | NM_146173                       |  |
| ladinin                                                                                                                                            | Lad1                       | -3.17          | 0.00         | A_51_P116932                 | NM_133664                       |  |
| acyl-CoA synthetase short-chain family member 2                                                                                                    | Acss2                      | -3.18          | 0.40         | A_52_P566718                 | NM_019811                       |  |

|                                                                                                                      |             |       |      |               |             |
|----------------------------------------------------------------------------------------------------------------------|-------------|-------|------|---------------|-------------|
| camello-like 5<br>urocanase domain containing<br>1                                                                   | Cml5        | -3.18 | 0.36 | A_52_P2710    | NM_023493   |
| syntrophin, gamma 2                                                                                                  | Uroc1       | -3.24 | 0.00 | A_51_P206225  | NM_144940   |
| ARD1 homolog B (S.<br>cerevisiae)                                                                                    | Sntg2       | -3.25 | 0.36 | A_51_P369998  | NM_172951   |
| aldo-keto reductase family 1,<br>member C14                                                                          | C8000       | -3.27 | 0.00 | A_51_P282297  | NM_00103319 |
| amylase 1, salivary                                                                                                  | 8           | -3.27 | 0.00 | A_51_P282297  | 1           |
| ring finger protein 130;<br>similar to Ring finger protein<br>130                                                    | Akr1c<br>14 | -3.29 | 0.67 | A_51_P284177  | NM_134072   |
| kidney expressed gene 1                                                                                              | Amy1        | -3.35 | 0.23 | A_51_P383638  | NM_007446   |
| lactate dehydrogenase D                                                                                              | Rnf13       | -3.39 | 0.13 | A_52_P225438  | NM_021540   |
| fat mass and obesity<br>associated                                                                                   | 0           | -3.39 | 0.13 | A_52_P225438  | NM_021540   |
| BCL2-like 1                                                                                                          | Keg1        | -3.44 | 0.36 | A_52_P653825  | NM_029550   |
| E2F transcription factor 8<br>melanoma inhibitory activity<br>2                                                      | Ldhd        | -3.53 | 0.00 | A_52_P161454  | NM_027570   |
| cell division cycle 123<br>homolog (S. cerevisiae)                                                                   | Fto         | -3.56 | 0.00 | A_51_P199899  | NM_011936   |
| calcium channel, voltage-<br>dependent, gamma subunit 2                                                              | Bcl211      | -3.67 | 0.36 | A_52_P510877  | NM_009743   |
| predicted gene 1966;<br>predicted gene 8995;<br>GTPase, very large interferon<br>inducible 1                         | E2f8        | -3.68 | 0.80 | A_52_P1135379 | AK158295    |
| epidermal growth factor<br>receptor                                                                                  | Mia2        | -3.68 | 0.00 | A_52_P168319  | NM_177321   |
| G protein-coupled receptor<br>98                                                                                     | G4310       | -3.68 | 0.00 | A_52_P168319  | NM_177321   |
| 4short chain<br>dehydrogenase/reductase<br>family 9C, member 7                                                       | 01I09       | -3.68 | 0.00 | A_52_P168319  | NM_177321   |
| metastasis associated lung<br>adenocarcinoma transcript 1<br>(non-coding RNA)                                        | Rik         | -3.70 | 0.00 | A_52_P345351  | NM_133837   |
| nudix (nucleoside<br>diphosphate linked moiety<br>X)-type motif 7                                                    | Cacng       | -3.72 | 0.00 | A_51_P226645  | AK047238    |
| ankyrin repeat and KH<br>domain containing 1;<br>eukaryotic translation<br>initiation factor 4E binding<br>protein 3 | 2           | -3.72 | 0.00 | A_51_P226645  | AK047238    |
| solute carrier family 22<br>(organic anion transporter),<br>member 7                                                 | Gm19        | -3.81 | 0.36 | A_52_P431615  | XM_485982   |
| phospholipid scramblase 2                                                                                            | 66          | -3.81 | 0.36 | A_52_P431615  | XM_485982   |
|                                                                                                                      | Egfr        | -3.90 | 0.67 | A_52_P56471   | NM_007912   |
|                                                                                                                      | Gpr98       | -3.98 | 0.00 | A_51_P389539  | NM_054053   |
|                                                                                                                      | Sdro        | -4.03 | 0.00 | A_51_P319289  | NM_027301   |
|                                                                                                                      | Malat1      | -4.05 | 0.00 | A_52_P416123  | AK020483    |
|                                                                                                                      | Nudt7       | -4.19 | 0.36 | A_52_P136914  | NM_024437   |
|                                                                                                                      | Eif4eb      | -4.20 | 0.13 | A_52_P278497  | NM_201256   |
|                                                                                                                      | p3          | -4.20 | 0.13 | A_52_P278497  | NM_201256   |
|                                                                                                                      | Slc22a      | -4.20 | 0.00 | A_51_P395856  | NM_144856   |
|                                                                                                                      | 7           | -4.20 | 0.00 | A_51_P395856  | NM_144856   |
|                                                                                                                      | Plscr2      | -4.32 | 0.00 | A_51_P251022  | NM_008880   |



|                                                                                              |                  |        |      |               |           |
|----------------------------------------------------------------------------------------------|------------------|--------|------|---------------|-----------|
| acetyl-Coenzyme A<br>carboxylase beta                                                        | Acacb            | -4.33  | 0.00 | A_51_P239236  | BC022940  |
| CTAGE family, member 5                                                                       | Mgea6            | -4.34  | 0.00 | A_52_P471088  | NM_146034 |
| predicted gene 1966;<br>predicted gene 8995;<br>GTPase, very large interferon<br>inducible 1 | Gvin1            | -4.39  | 0.44 | A_52_P251690  | NM_029000 |
| cytochrome P450, family 8,<br>subfamily b, polypeptide 1                                     | Cyp8b<br>1       | -4.40  | 0.00 | A_51_P266618  | NM_010012 |
| cysteine and glycine-rich<br>protein 3                                                       | Csrp3            | -4.49  | 0.00 | A_51_P133684  | NM_013808 |
| cullin 4A                                                                                    | Cul4a            | -4.54  | 0.00 | A_51_P435251  | NM_146207 |
| formiminotransferase<br>cyclodeaminase                                                       | Ftcd             | -4.69  | 0.00 | A_51_P413740  | NM_080845 |
| neurexin I                                                                                   | Nrxn1            | -4.80  | 0.36 | A_52_P121342  | AK045351  |
| C-type lectin domain family<br>4, member f                                                   | Clec4f           | -4.94  | 0.00 | A_51_P271865  | NM_016751 |
| DnaJ (Hsp40) homolog,<br>subfamily C, member 1                                               | Dnajc1           | -5.14  | 0.00 | A_51_P159895  | NM_007869 |
| sushi domain containing 4                                                                    | Susd4            | -5.34  | 0.24 | A_51_P252000  | NM_144796 |
| V-set and immunoglobulin<br>domain containing 4                                              | Vsig4<br>C7300   | -5.53  | 0.00 | A_51_P128834  | NM_177789 |
| RIKEN cDNA C730036E19<br>gene                                                                | 36E19<br>Rik     | -5.61  | 0.00 | A_52_P972003  | AK050309  |
| NADH dehydrogenase<br>(ubiquinone) 1, alpha/beta<br>subcomplex, 1; predicted<br>gene 4459    | Ndufa<br>b1      | -5.90  | 0.00 | A_52_P1093473 | NM_028177 |
| IMP2 inner mitochondrial<br>membrane peptidase-like ( <i>S.</i><br><i>cerevisiae</i> )       | Immp2<br>1       | -6.33  | 0.36 | A_52_P517063  | NM_053122 |
| complement component 6                                                                       | C6               | -6.46  | 0.36 | A_51_P449995  | NM_016704 |
| family with sequence<br>similarity 158, member A                                             | 05A01<br>Rik     | -7.51  | 0.00 | A_51_P272147  | NM_033146 |
| similar to cytochrome P450;<br>cytochrome P450, family 2,<br>subfamily c, polypeptide 54     | Cyp2c<br>54      | -7.60  | 0.00 | A_52_P154580  | NM_206537 |
| CD163 antigen                                                                                | Cd163            | -8.05  | 0.00 | A_51_P231042  | NM_053094 |
| glial cell line derived<br>neurotrophic factor family<br>receptor alpha 1                    | Gfra1            | -8.83  | 0.00 | A_52_P398998  | NM_010279 |
| serine (or cysteine) peptidase<br>inhibitor, clade A, member 4,<br>pseudogene 1              | Serpin<br>a4-ps1 | -10.35 | 0.36 | A_52_P677262  | BC031891  |
| elongation of very long chain<br>fatty acids (FEN1/Elo2,<br>SUR4/Elo3, yeast)-like 3         | Elovl3           | -12.66 | 0.23 | A_51_P324633  | NM_007703 |
| complement factor D<br>(adipsin)                                                             | Cfd              | -13.06 | 0.92 | A_51_P156955  | NM_013459 |

|                                                             |          |        |      |              |           |
|-------------------------------------------------------------|----------|--------|------|--------------|-----------|
| solute carrier organic anion transporter family, member 1a1 | Slco1a1  | -22.38 | 0.00 | A_51_P165111 | NM_013797 |
| solute carrier organic anion transporter family, member 1a1 | Slco1a1  | -27.44 | 0.00 | A_51_P103144 | AY195869  |
| expressed sequence AU018778                                 | AU018778 | -28.68 | 0.00 | A_51_P178772 | NM_144930 |

\* Agilent ID. \*\* Refseq mRNA accession number (<http://www.ncbi.nlm.nih.gov>). Original microarray data are available at Gene expression omnibus ([www.ncbi.nlm.nih.gov/projects/geo](http://www.ncbi.nlm.nih.gov/projects/geo)) under the accession number GSEXXXX

\* Refseq mRNA accession number (<http://www.ncbi.nlm.nih.gov>). \*\* Agilent ID. Original microarray data are available at Gene expression omnibus ([www.ncbi.nlm.nih.gov/projects/geo](http://www.ncbi.nlm.nih.gov/projects/geo)) under the accession number GSEXXXX
